# Supplementary material for: Determinants of expression variability
Source: PubMed Central journal article supplement — Nucleic Acids Res. 2014 Jan 15;42(6):3503–14. doi: 10.1093/nar/gkt1364 (PMC3973347; doi:10.1093/nar/gkt1364), 2014-01-15

## Supplement 2

The figures indicate the mean values for a given feature in various tissues plotted according to different EV percentiles. The x-axis starts from 5% most hypo-variable and increments 5% upto 50%. This is followed by 50% most hyper-variable decrementing by 5% down to 5%. The names of tissues where a significant linear regression correlation was observed are colored red (positive) and blue (negative).

For DHS, histone marks, and intrinsic disorder, values are transformed using  $\ln(x/(1-x))$ , where x is the fraction of base pairs in the given region that exhibit the feature. Conservation values are mean PhastCons scores. Values for gene and transcript size are base pairs. CNV and disease genes are shown as fractions of their percentile. Protein-protein interaction is quantified as mean node degree.

### FEATURES

|                                                         |    |
|---------------------------------------------------------|----|
| Figures 1–4: DHS .....                                  | 2  |
| Figures 5–8: H3K4me3 .....                              | 6  |
| Figures 9–12: H3K27me3 .....                            | 10 |
| Figures 13–16: H3K36me3 .....                           | 14 |
| Figure 17: Conservation (PhastCons) .....               | 18 |
| Figure 18: Gene Size .....                              | 21 |
| Figure 19: nTranscripts .....                           | 24 |
| Figure 20: Num of Exons .....                           | 27 |
| Figure 21: GC fraction .....                            | 30 |
| Figure 22: Transcript Size .....                        | 33 |
| Figure 23: Num of TF clusters with a binding site ..... | 36 |
| Figure 24: CNV .....                                    | 39 |
| Figure 25: Intrinsic disorder .....                     | 42 |
| Figure 26: Disease gene fraction .....                  | 45 |
| Figure 27: Protein-protein interactions .....           | 48 |
| Figure 28: miRNA .....                                  | 51 |

Figure 1. DHS 2kb upstream

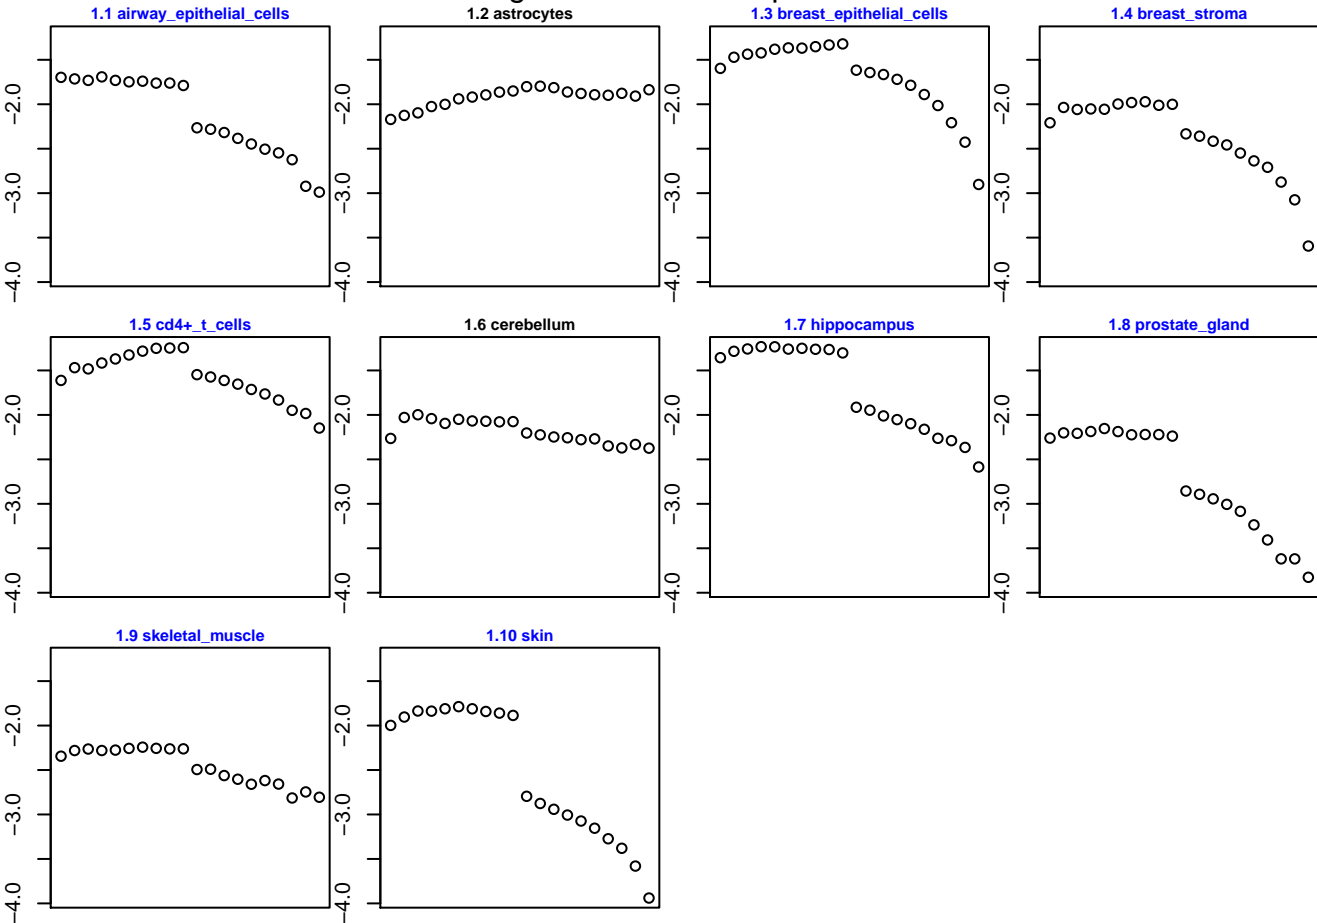

Figure 2. DHS 5kb upstream

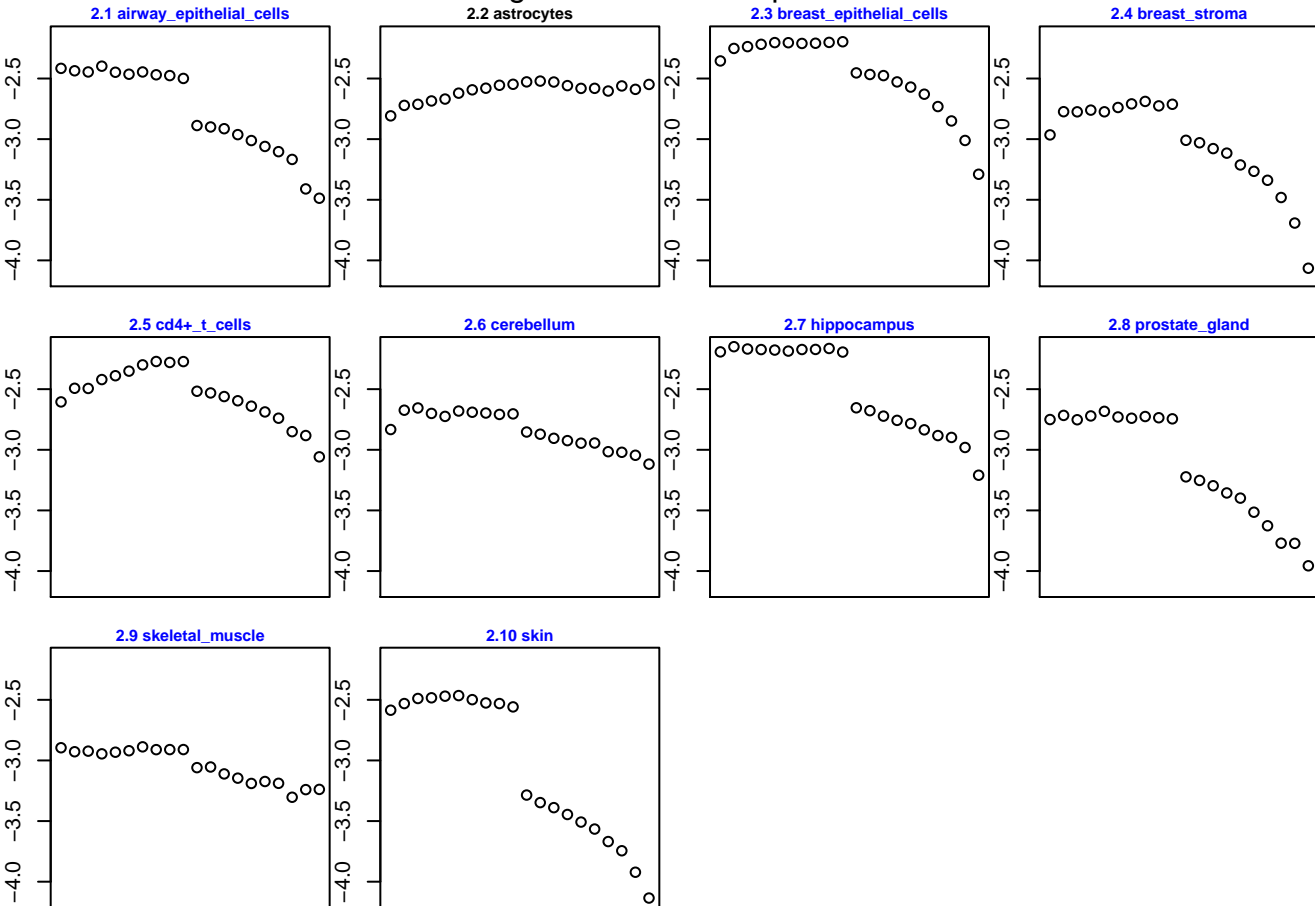

Figure 3. DHS gene body

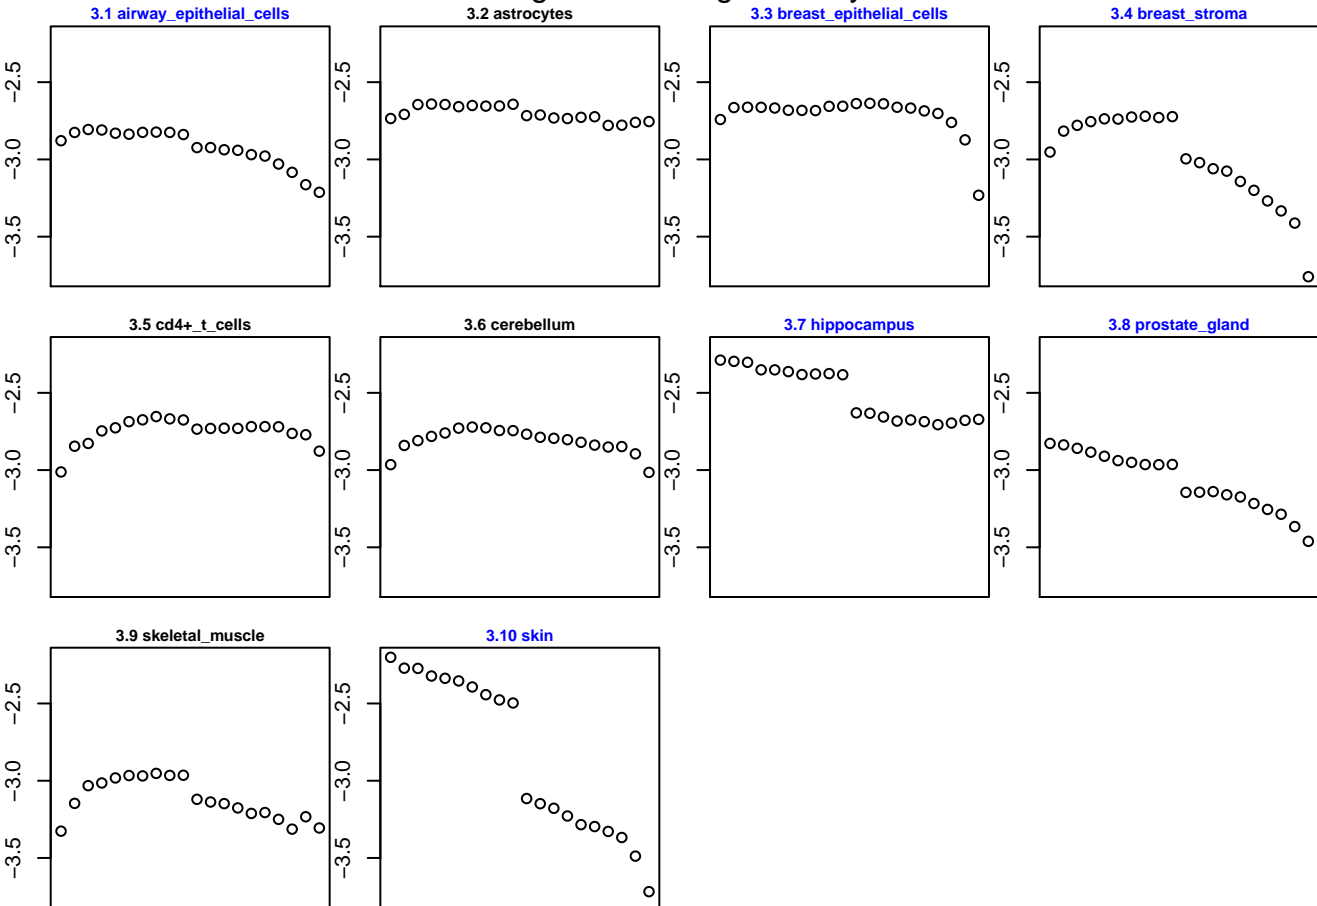

Figure 4. DHS gene + flanks

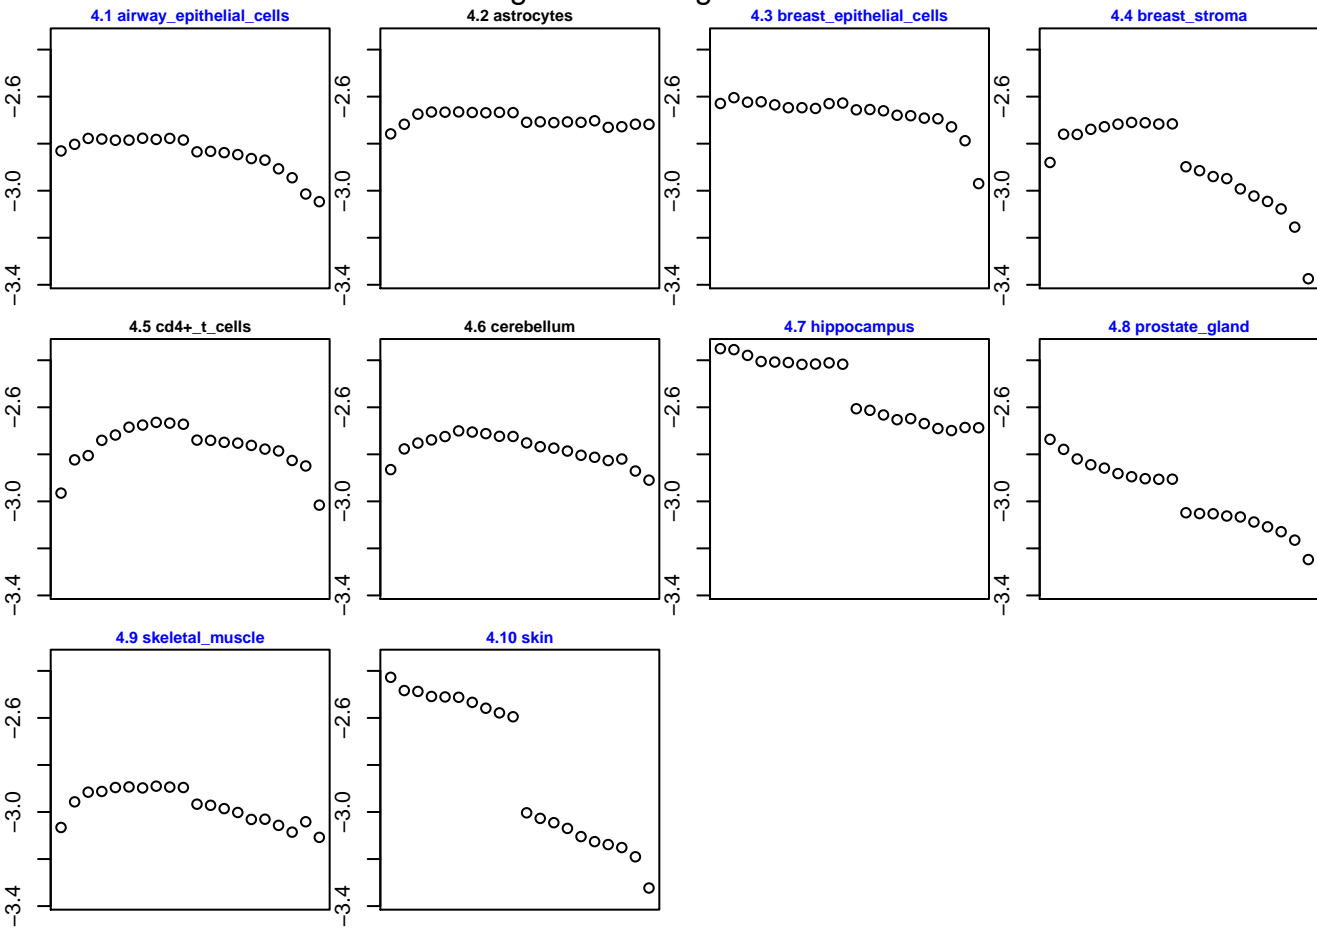

Figure 5. H3K4me3 2kb upstream

5.1 airway\_epithelial\_cells

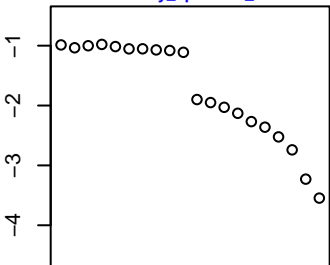

5.2 breast\_epithelial\_cells

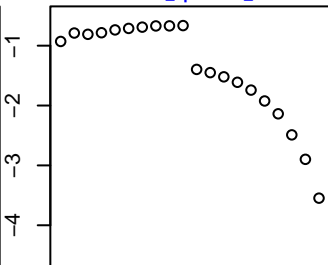

5.3 breast\_stroma

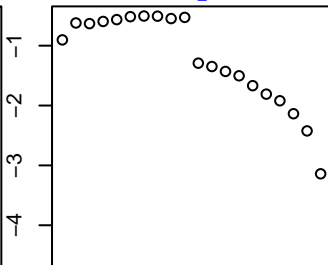

5.4 cerebellum

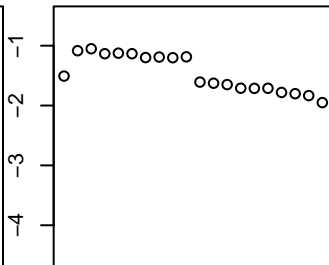

5.5 skeletal\_muscle

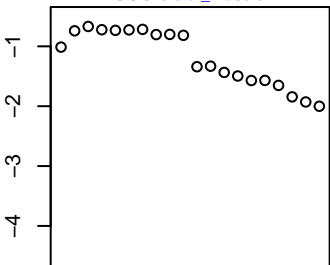

5.6 skin

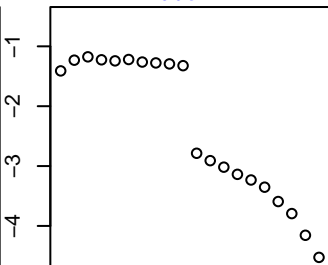

Figure 6. H3K4me3 5kb upstream

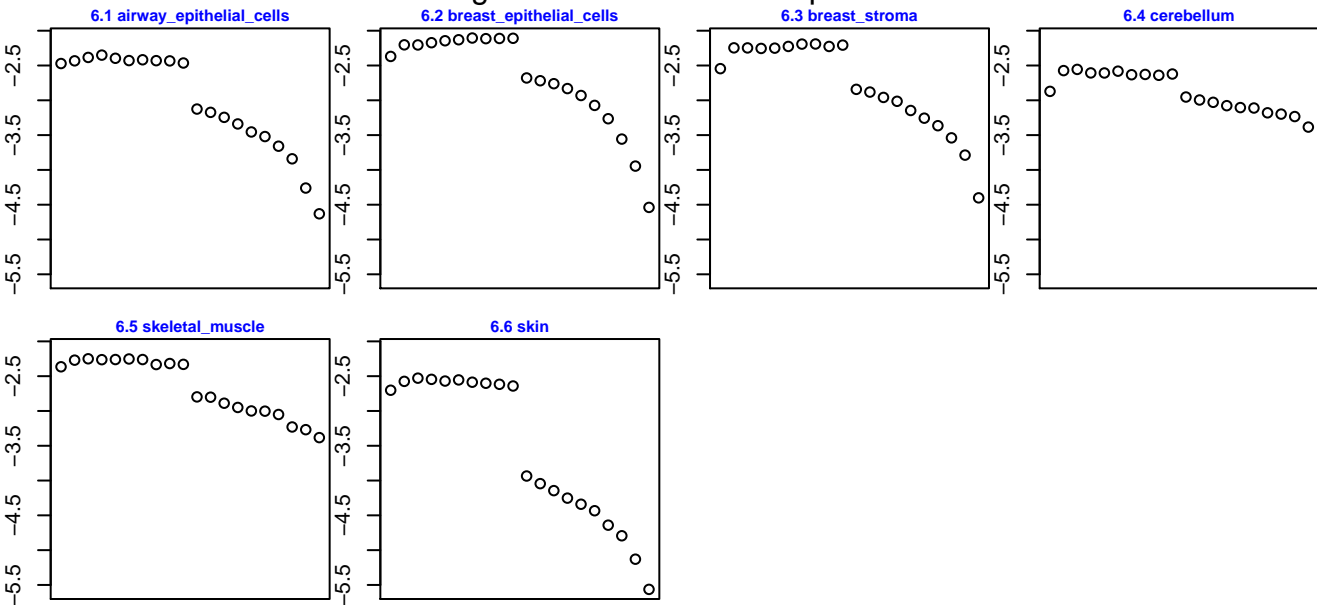

Figure 7. H3K4me3 gene body

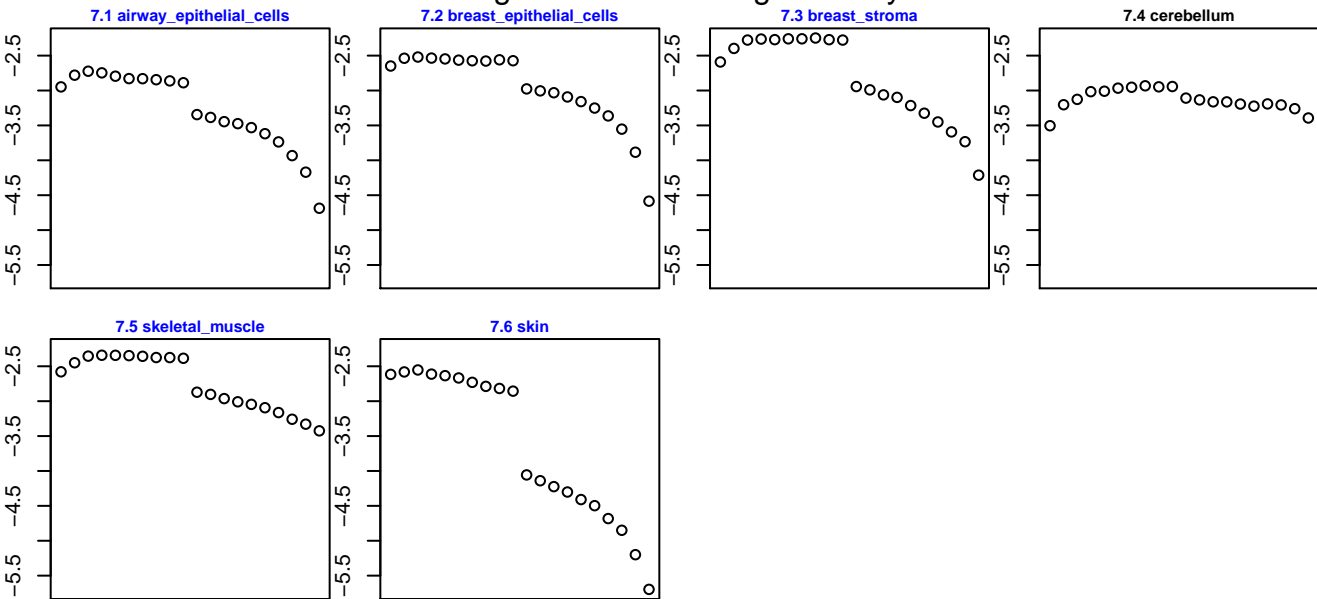



Figure 8. H3K4me3 gene + flanks

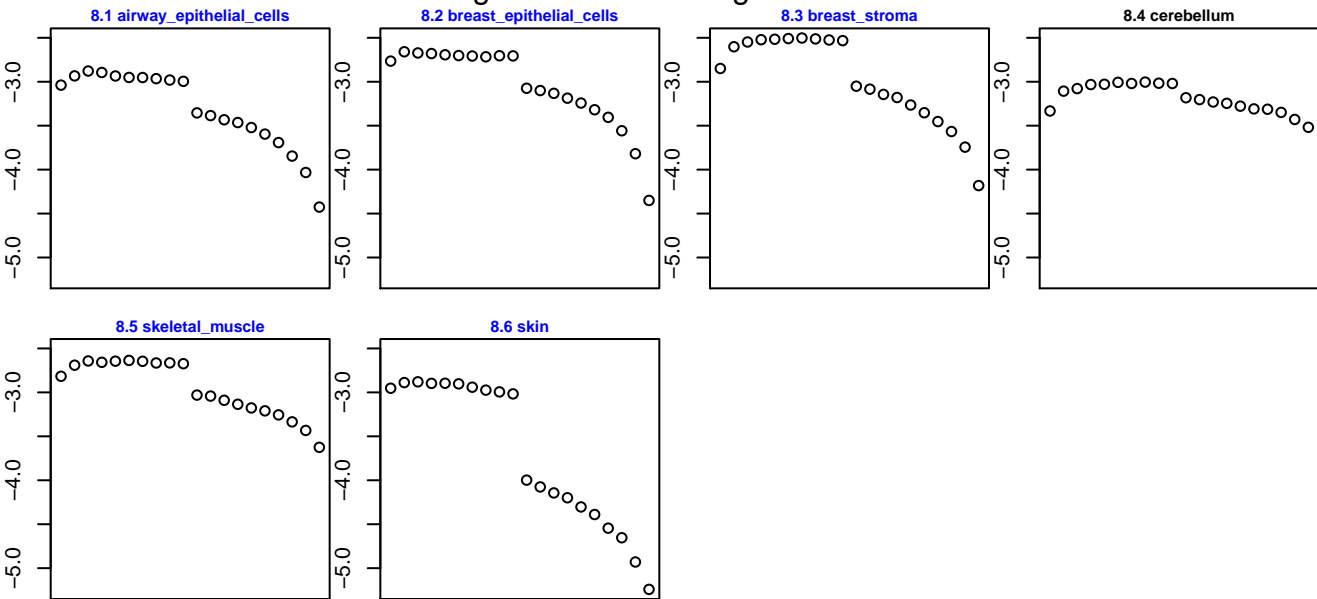

Figure 9. H3K27me3 2kb upstream

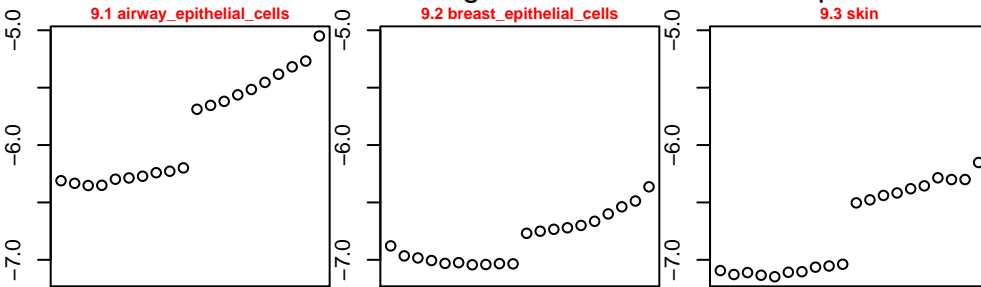

Figure 10. H3K27me3 5kb upstream

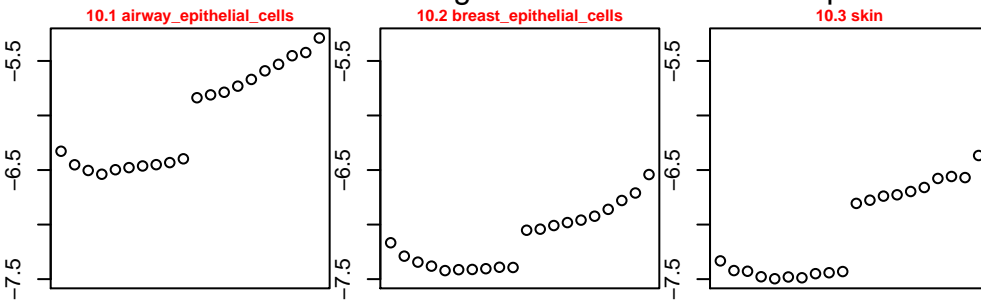

Figure 11. H3K27me3 gene body

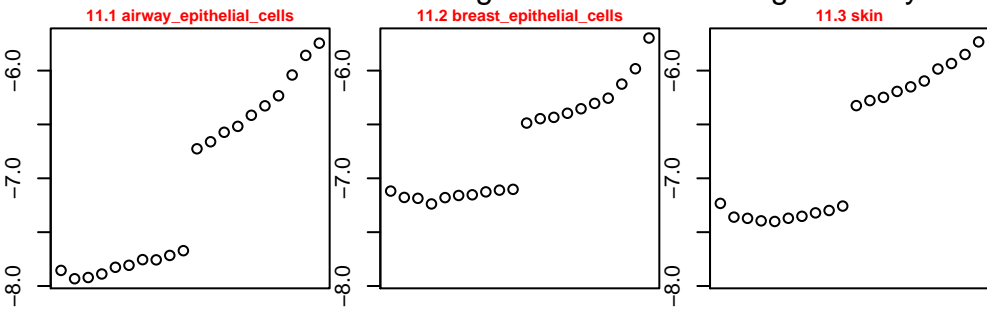

Figure 12. H3K27me3 gene + flanks

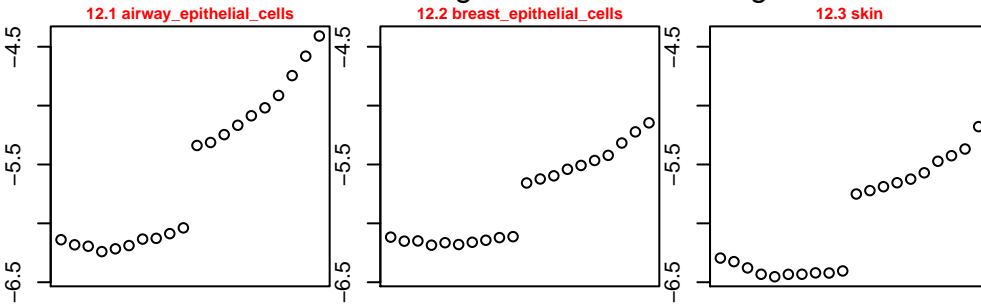

Figure 13. H3K36me3 2kb upstream

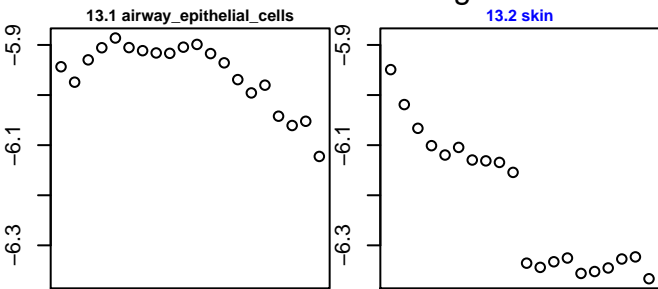

Figure 14. H3K36me3 5kb upstream

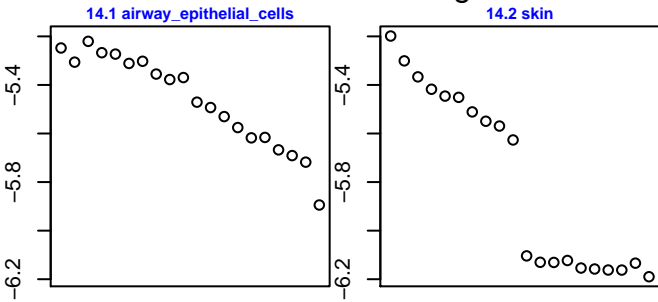

Figure 15. H3K36me3 gene body

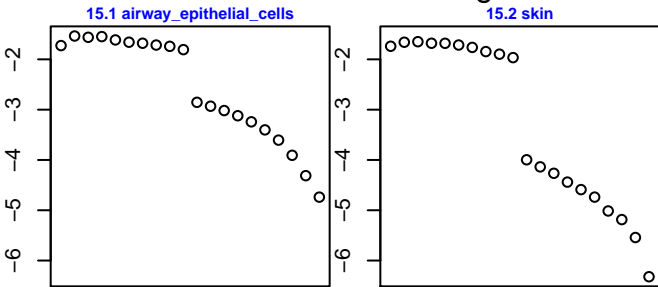



Figure 16. H3K36me3 gene + flanks

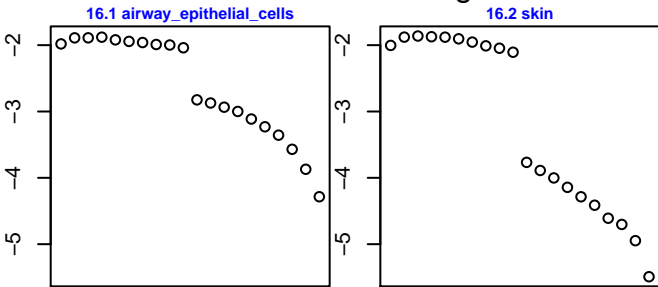

Figure 17. Conservation (phastCons)

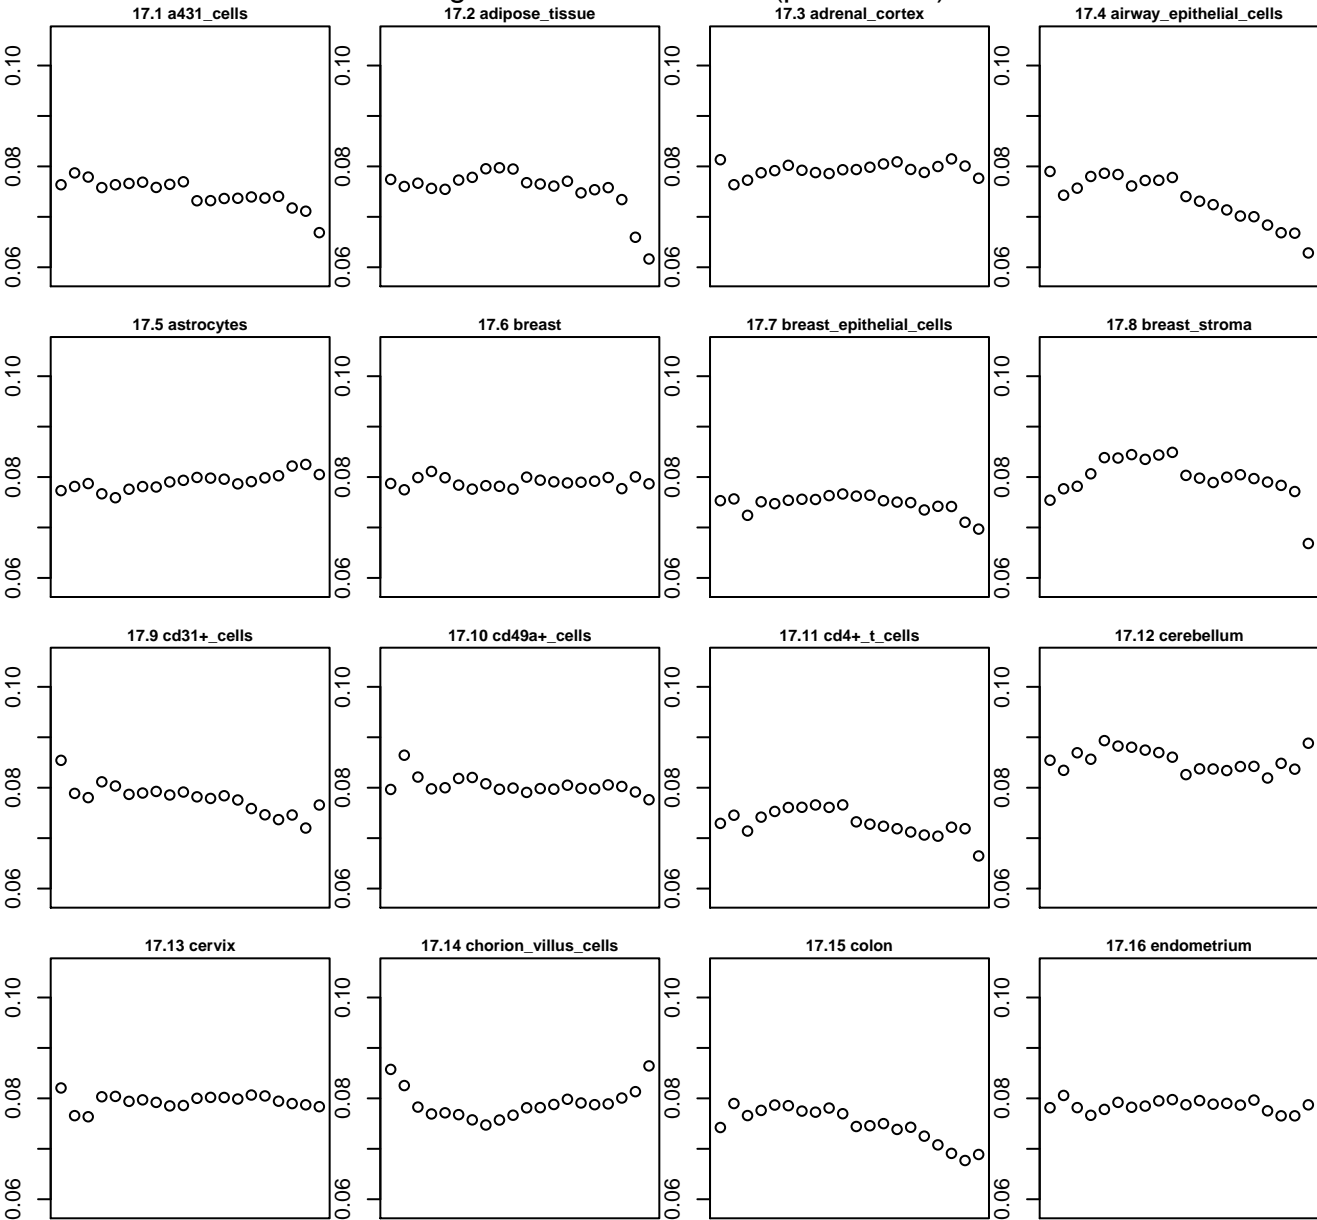

17.17 fetal\_cartilage

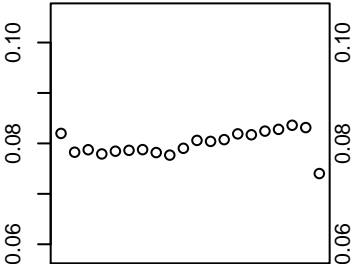

17.18 gingival\_epithelium

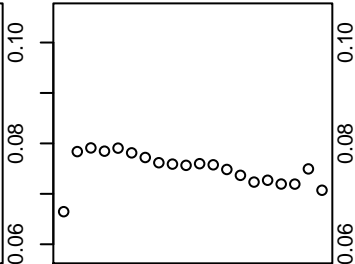

17.19 hippocampus

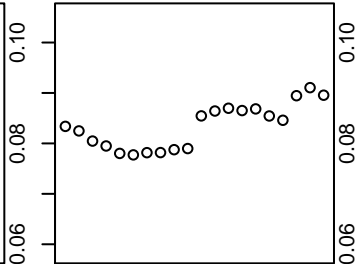

17.20 kidney

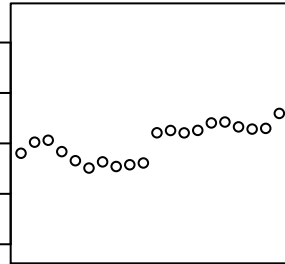

17.21 myometrium

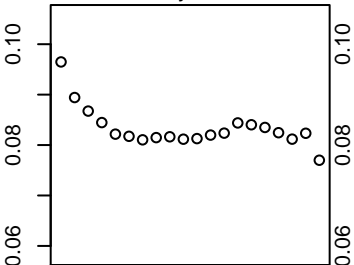

17.22 omental\_adipose\_tissue

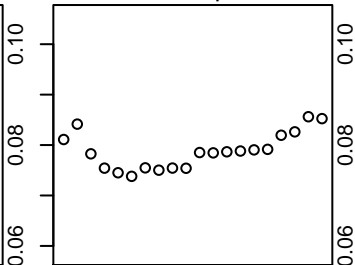

17.23 ovary

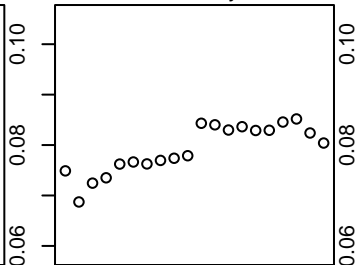

17.24 pbmc

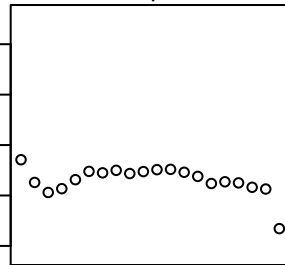

17.25 penis

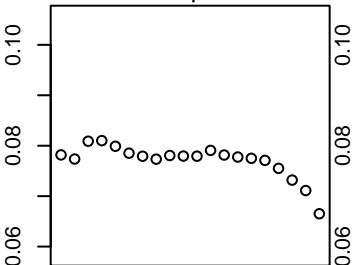

17.26 pituitary

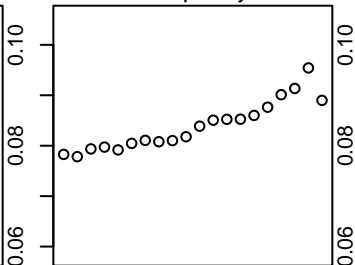

17.27 placenta

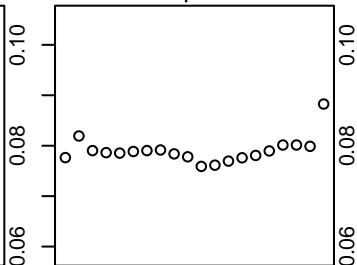

17.28 prostate\_gland

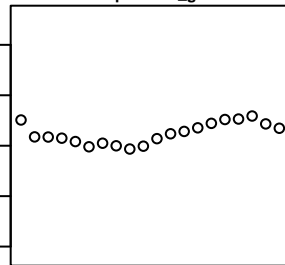

17.29 rectum

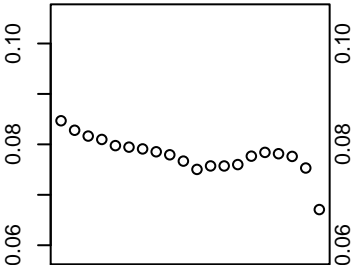

17.30 rectum\_mucosa

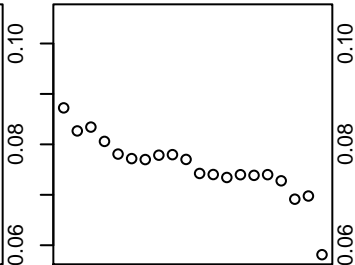

17.31 salivary\_gland

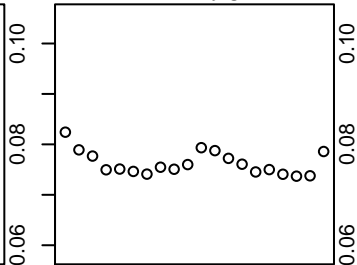

17.32 sigmoid\_colon

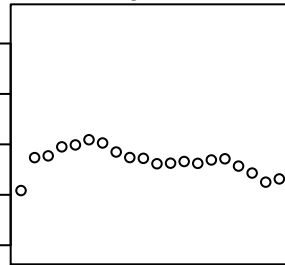

17.33 sinus\_mucosa

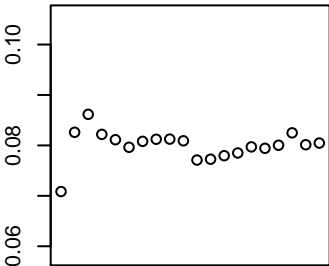

17.34 skeletal\_muscle

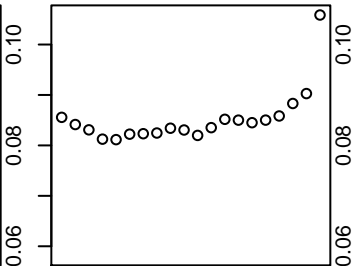

17.35 skin

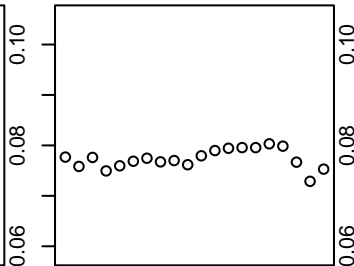

17.36 stomach

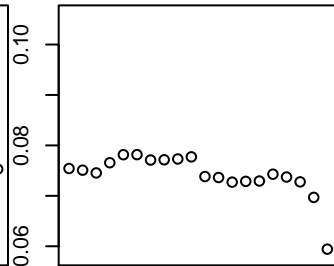

17.37 thyroid

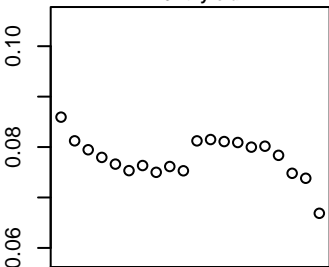

17.38 trigeminal\_ganglia

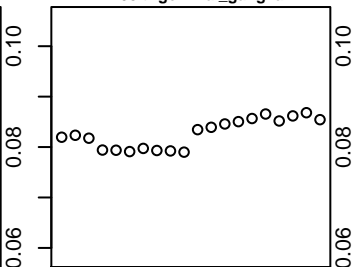

17.39 u251\_cells

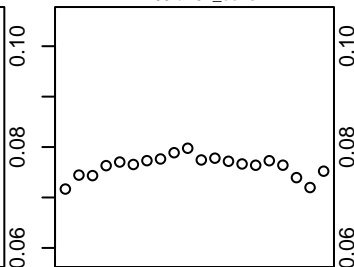

17.40 urethra

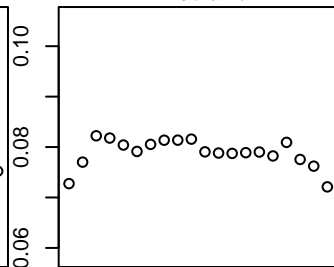

17.41 vulva

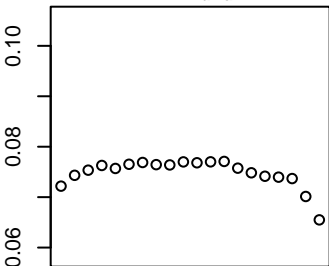

Figure 18. Gene Size

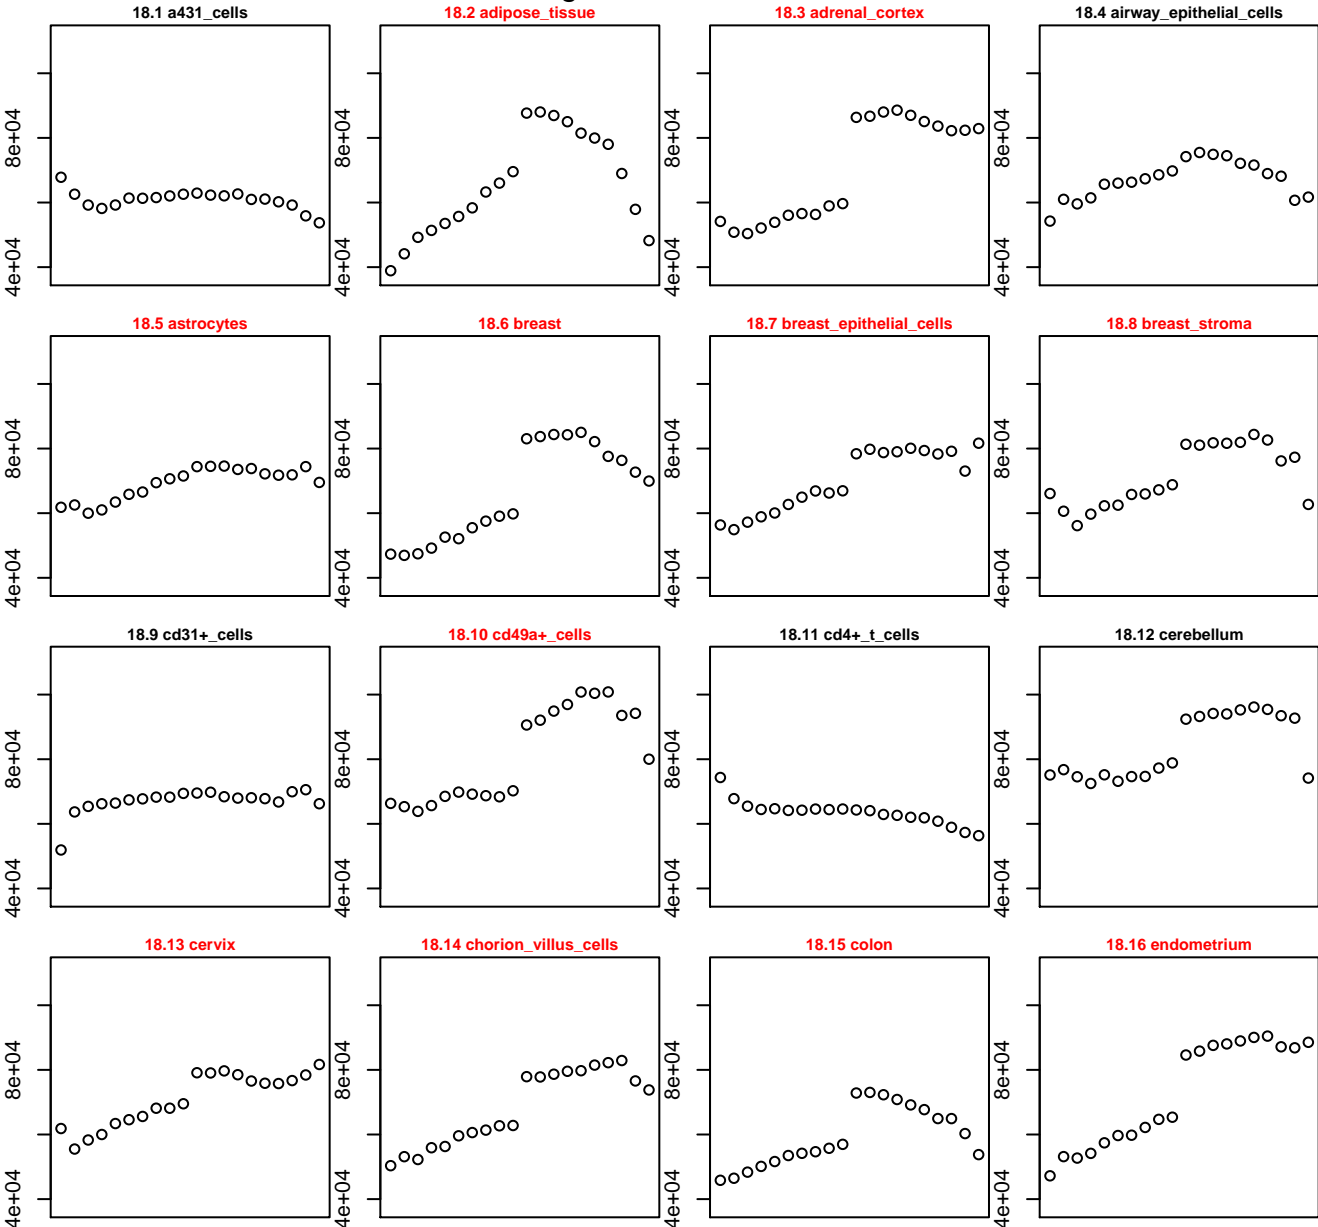

18.17 fetal\_cartilage

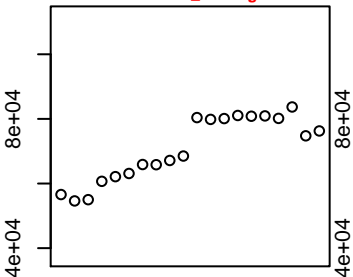

18.18 gingival\_epithelium

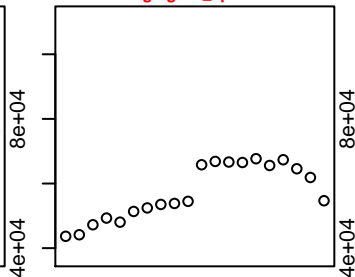

18.19 hippocampus

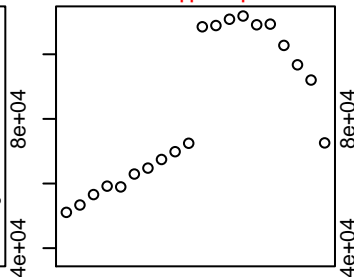

18.20 kidney

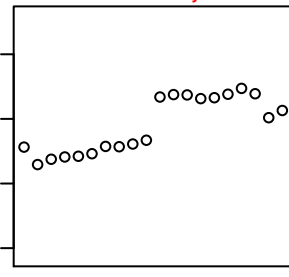

18.21 myometrium

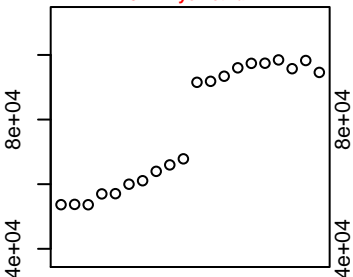

18.22 omental\_adipose\_tissue

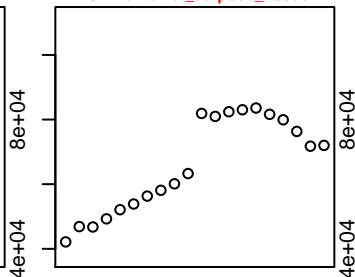

18.23 ovary

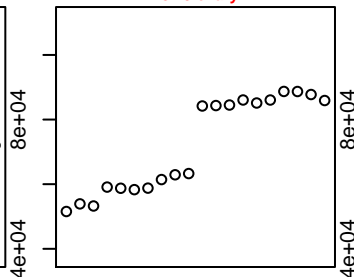

18.24 pbmc

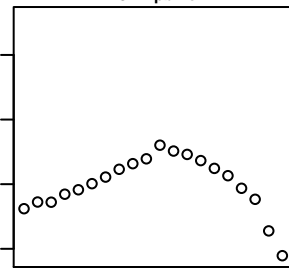

18.25 penis

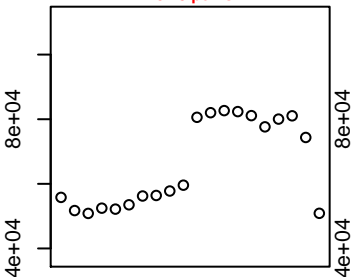

18.26 pituitary

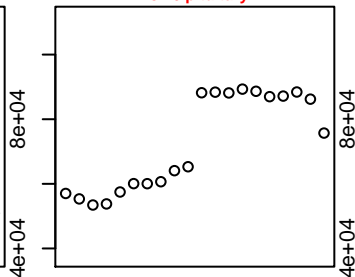

18.27 placenta

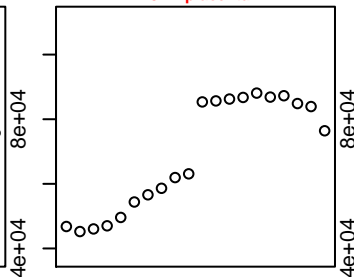

18.28 prostate\_gland

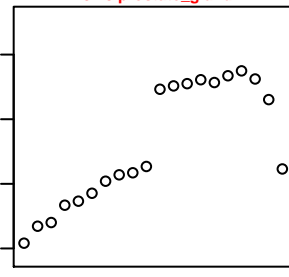

18.29 rectum

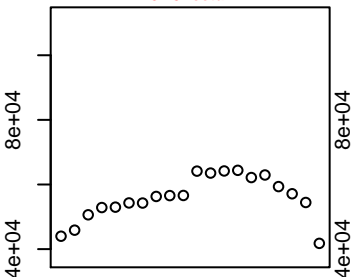

18.30 rectum\_mucosa

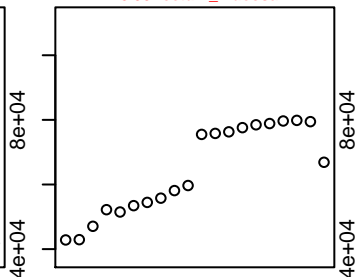

18.31 salivary\_gland

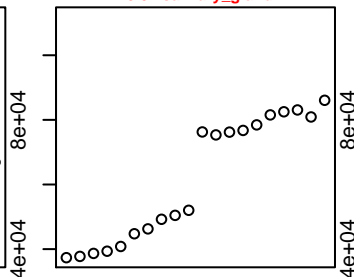

18.32 sigmoid\_colon

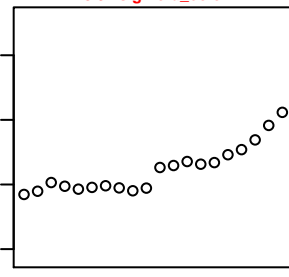

18.33 sinus\_mucosa

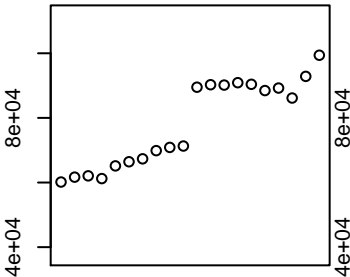

18.34 skeletal\_muscle

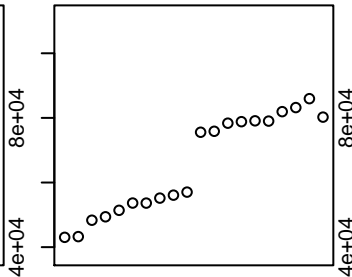

18.35 skin

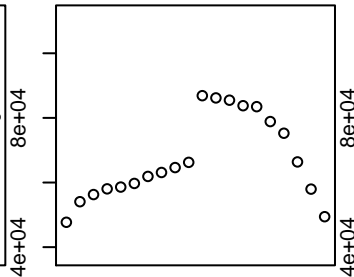

18.36 stomach

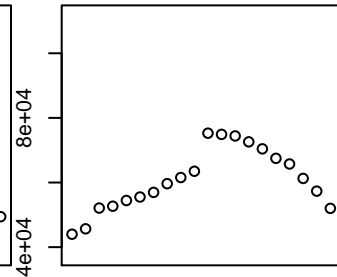

18.37 thyroid

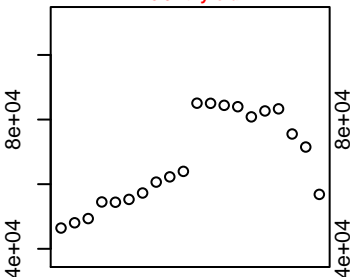

18.38 trigeminal\_ganglia

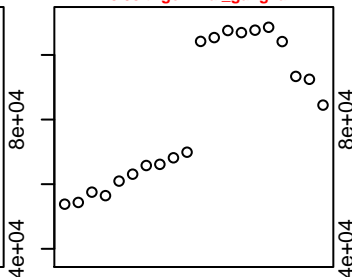

18.39 u251\_cells

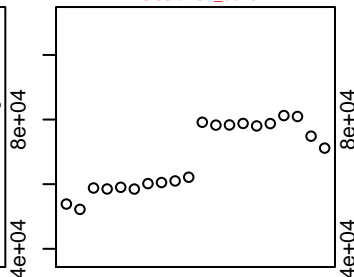

18.40 urethra

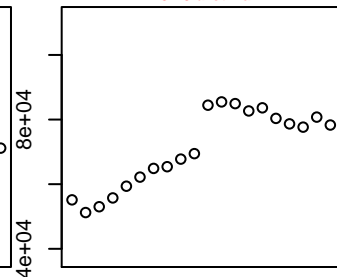

18.41 vulva

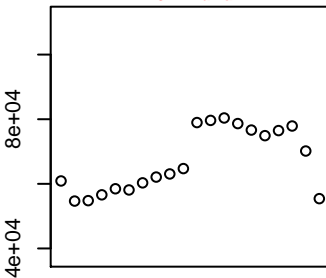

Figure 19. nTranscripts

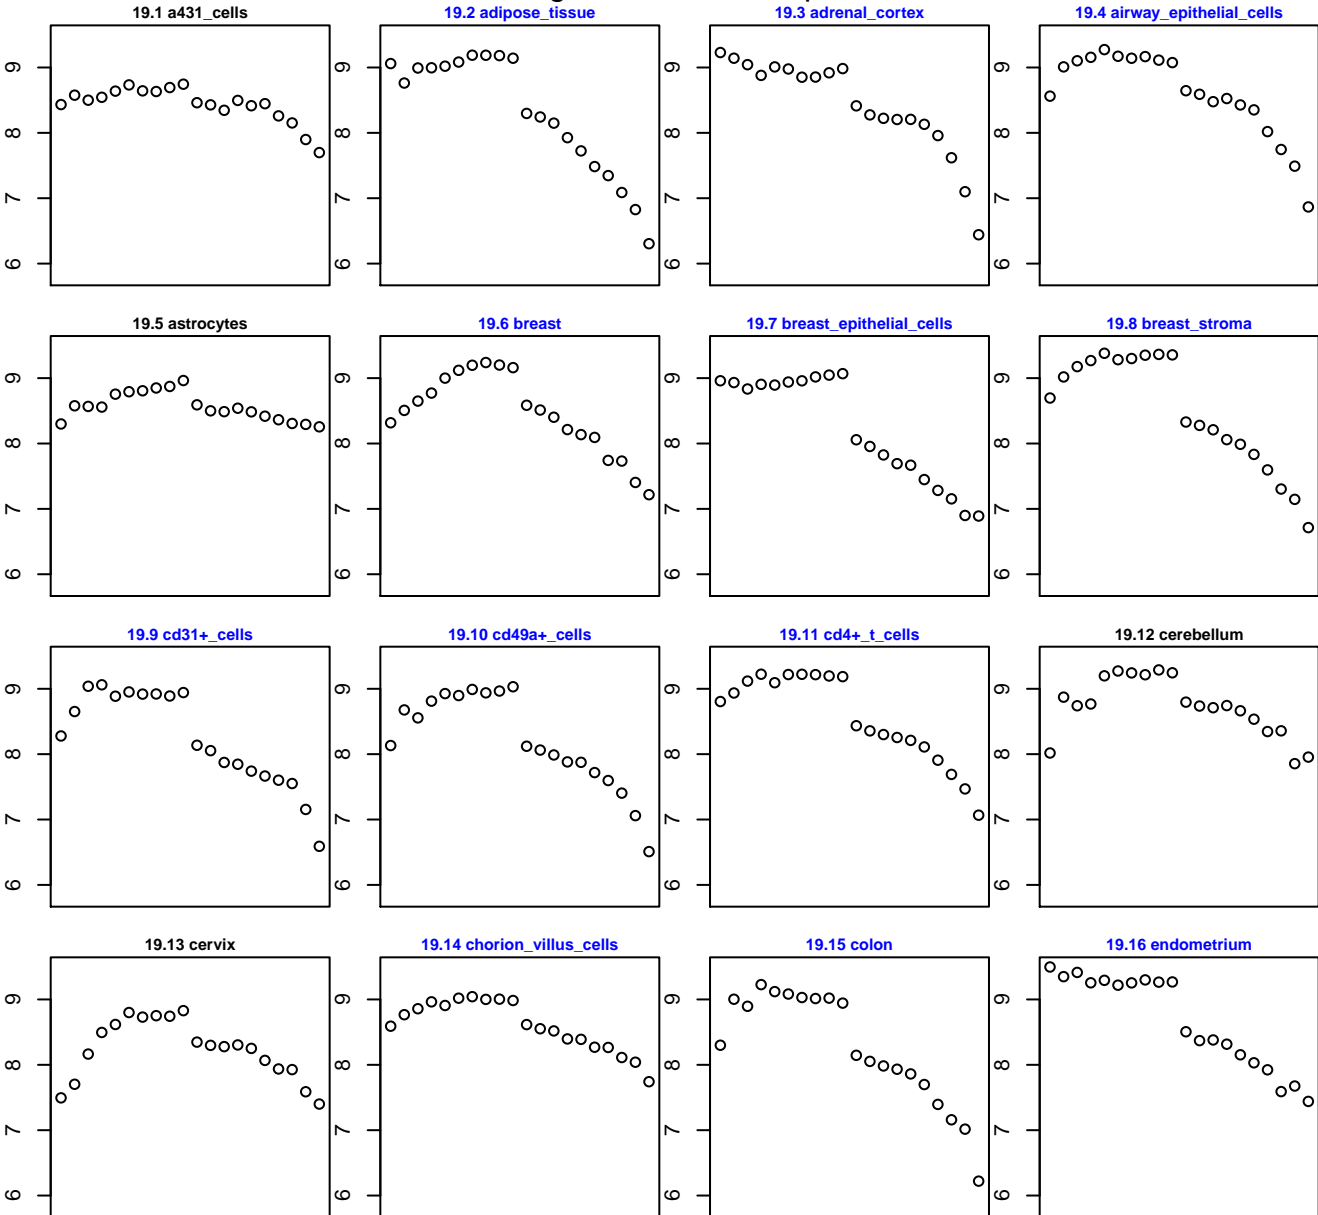



19.17 fetal\_cartilage

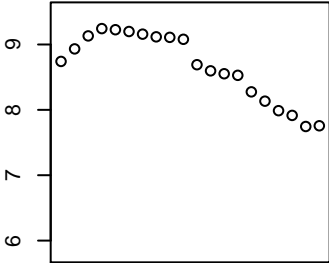

19.18 gingival\_epithelium

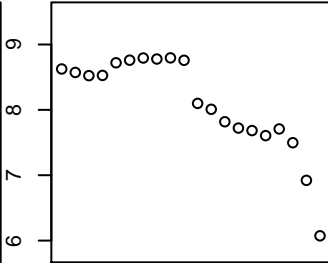

19.19 hippocampus

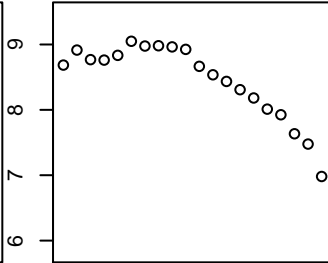

19.20 kidney

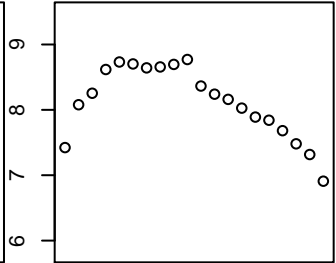

19.21 myometrium

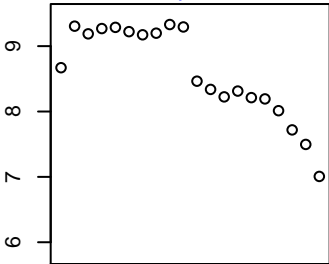

19.22 omental\_adipose\_tissue

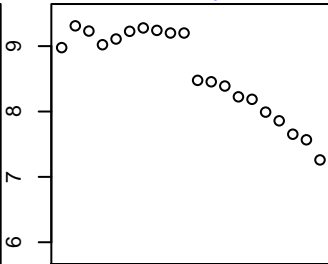

19.23 ovary

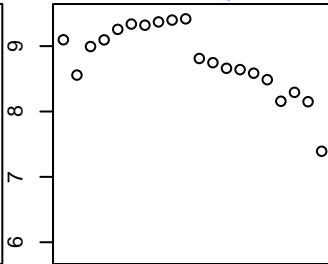

19.24 pbmc

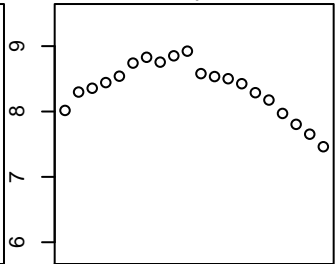

19.25 penis

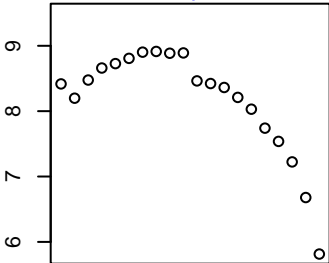

19.26 pituitary

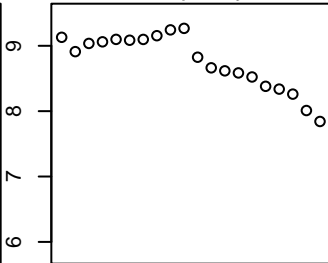

19.27 placenta

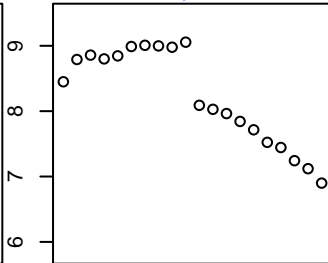

19.28 prostate\_gland

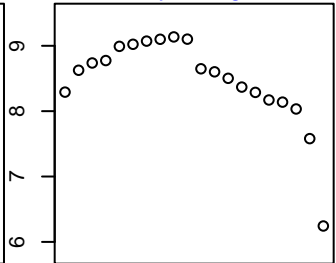

19.29 rectum

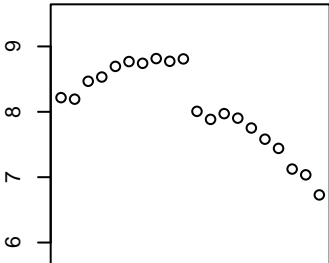

19.30 rectum\_mucosa

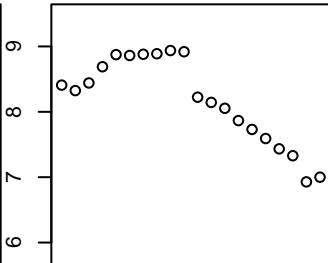

19.31 salivary\_gland

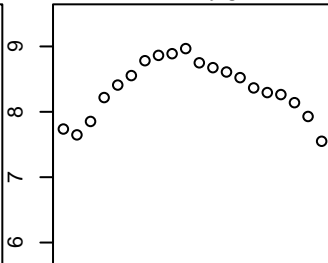

19.32 sigmoid\_colon

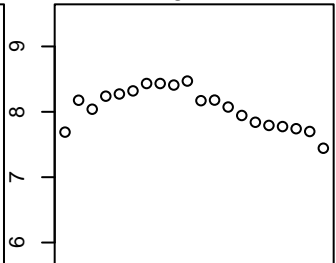

19.33 sinus\_mucosa

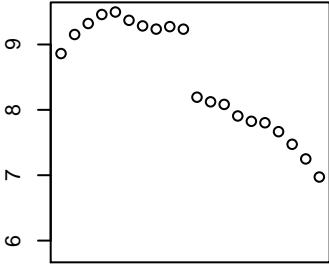

19.34 skeletal\_muscle

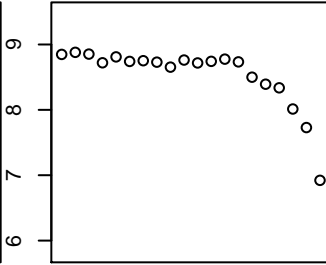

19.35 skin

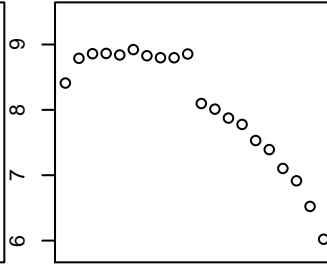

19.36 stomach

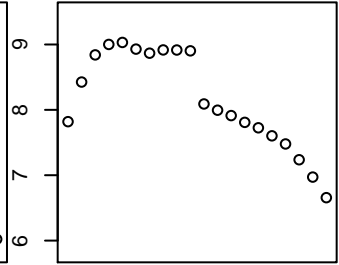

19.37 thyroid

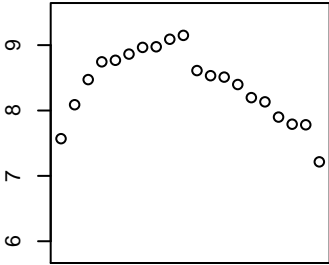

19.38 trigeminal\_ganglia

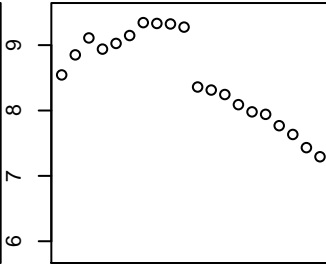

19.39 u251\_cells

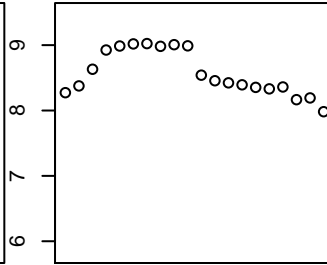

19.40 urethra

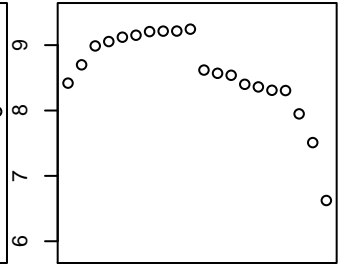

19.41 vulva

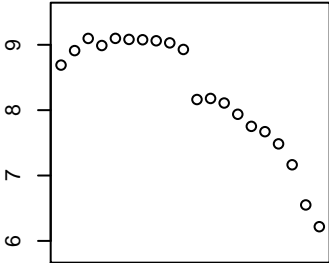

Figure 20. Num of Exons

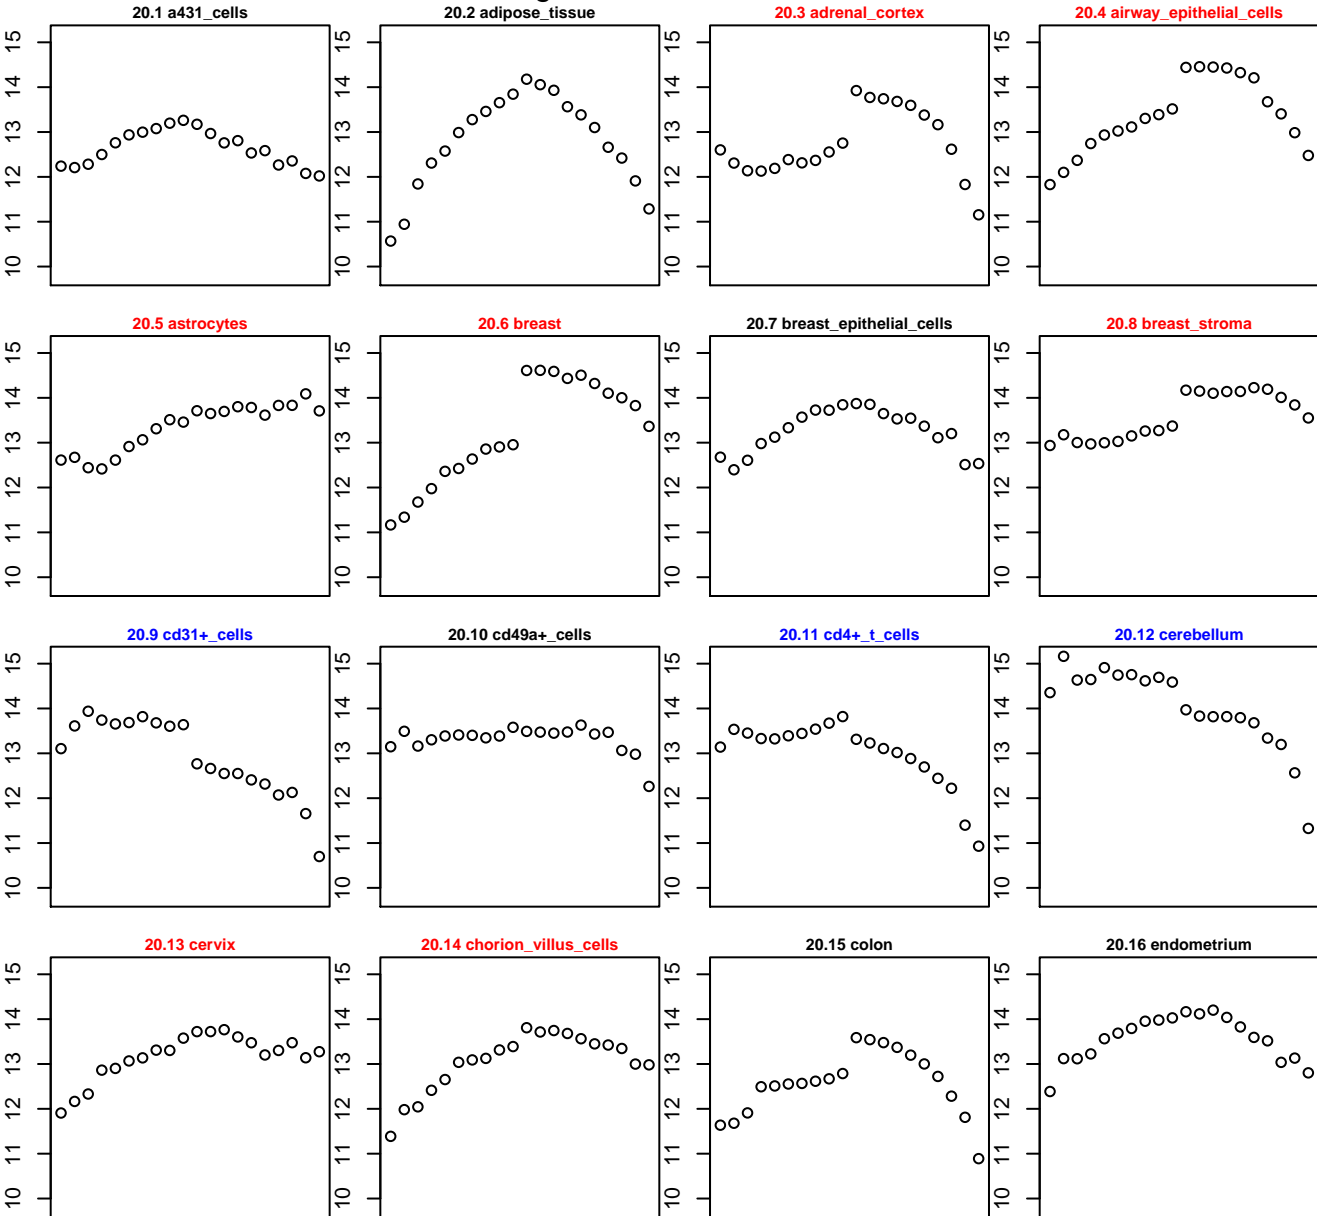

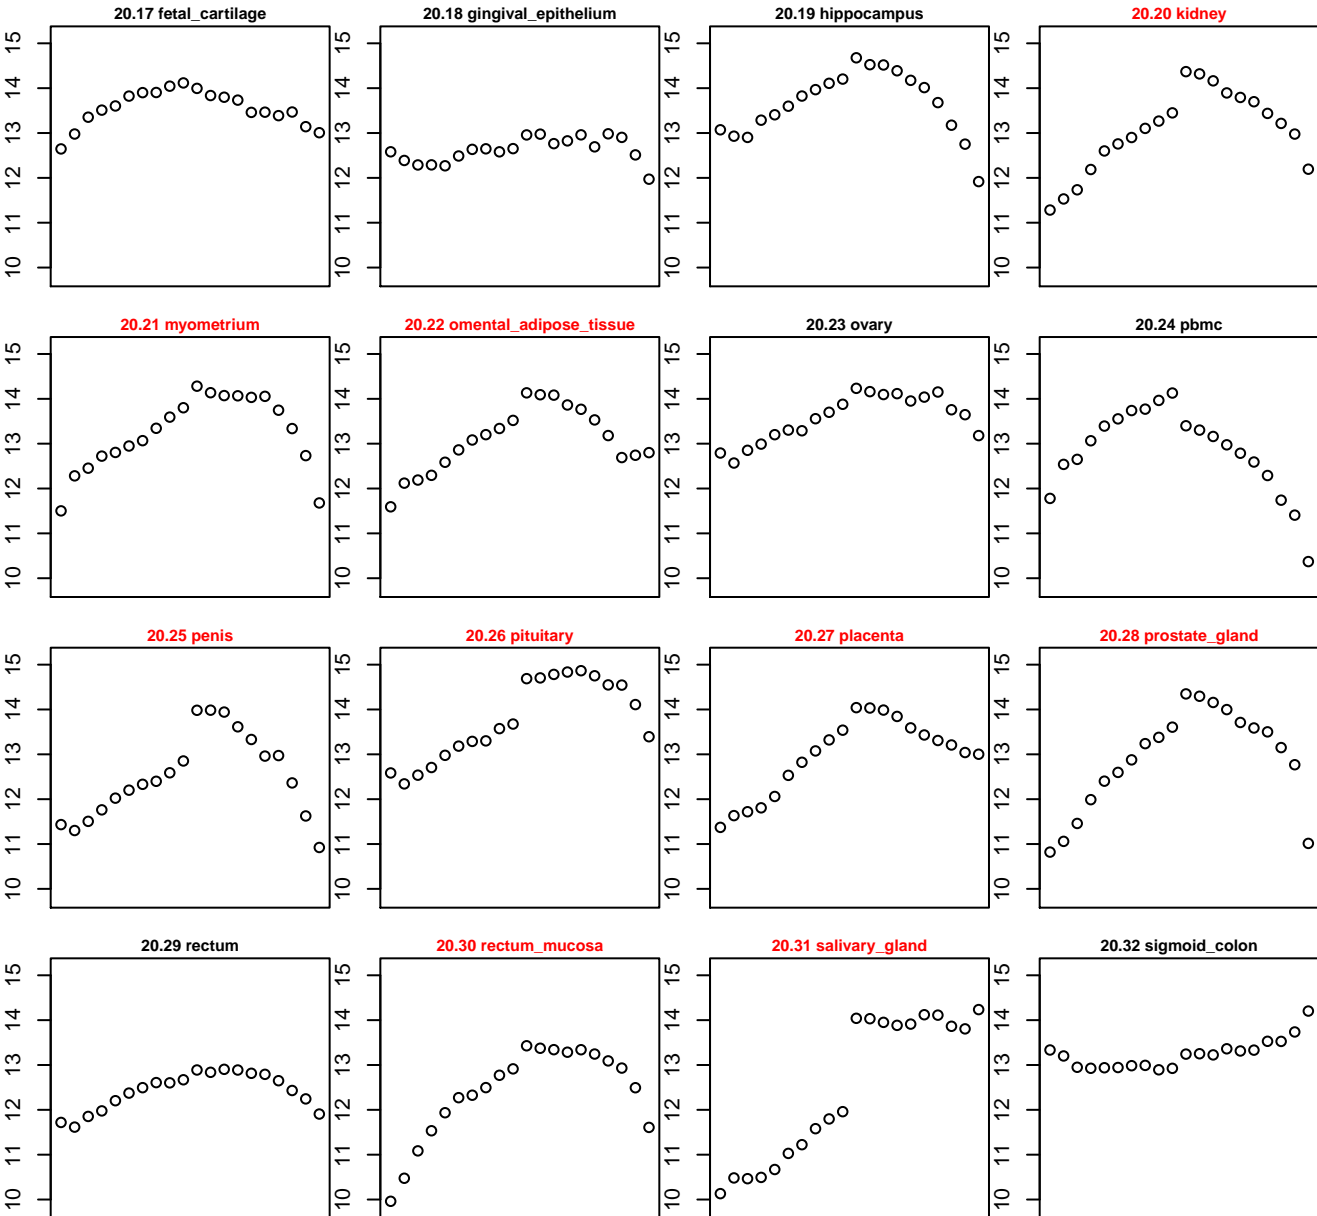

20.33 sinus\_mucosa

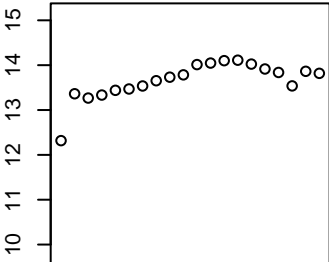

20.34 skeletal\_muscle

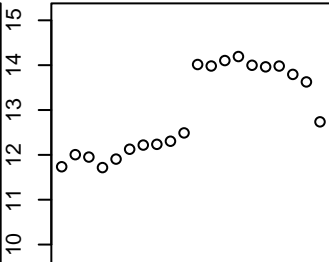

20.35 skin

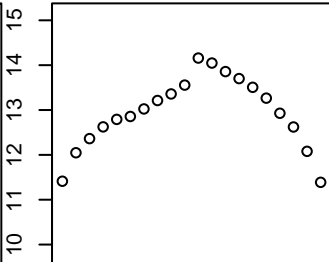

20.36 stomach

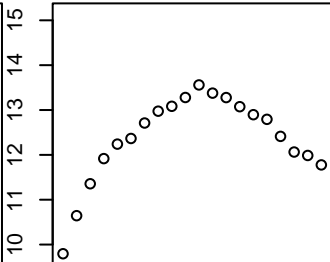

20.37 thyroid

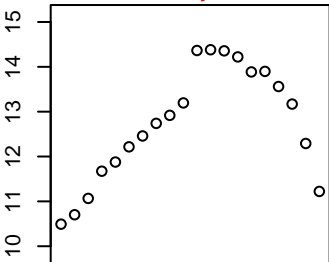

20.38 trigeminal\_ganglia

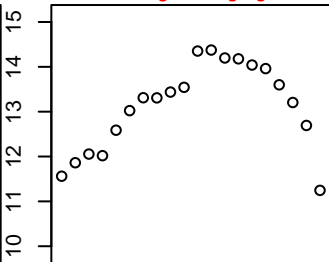

20.39 u251\_cells

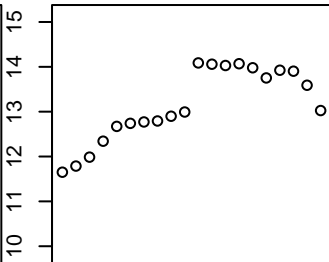

20.40 urethra

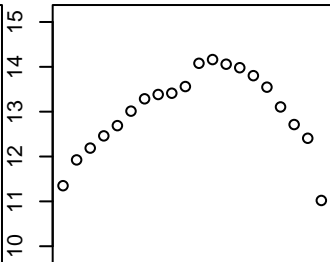

20.41 vulva

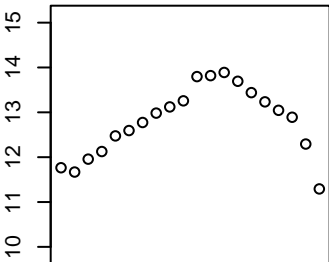

Figure 21. GC fraction

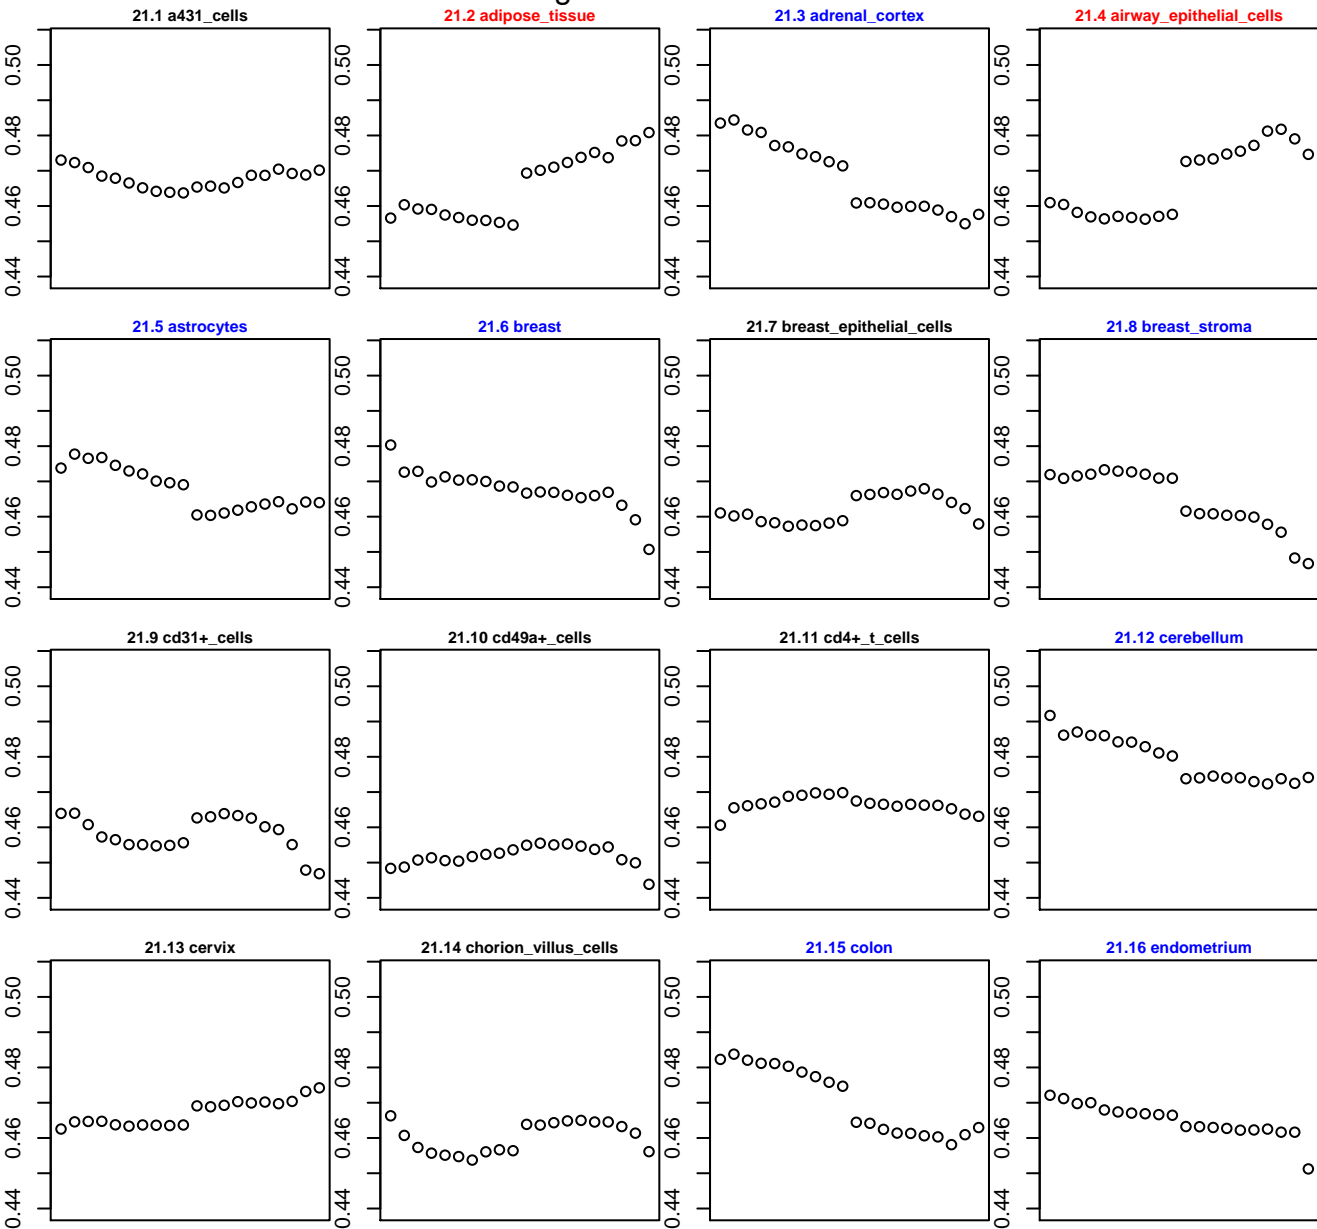

21.17 fetal\_cartilage

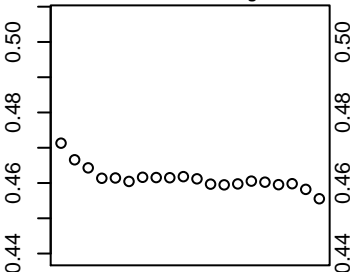

21.18 gingival\_epithelium

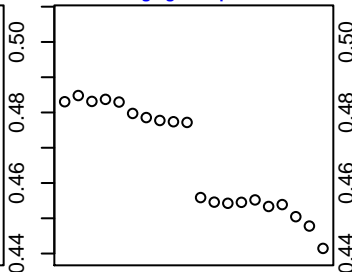

21.19 hippocampus

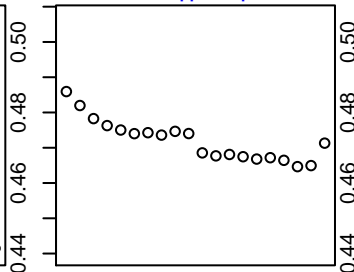

21.20 kidney

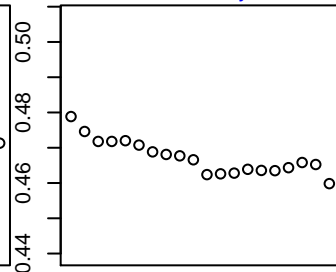

21.21 myometrium

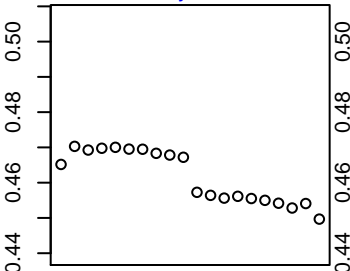

21.22 omental\_adipose\_tissue

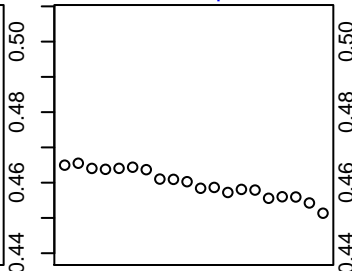

21.23 ovary

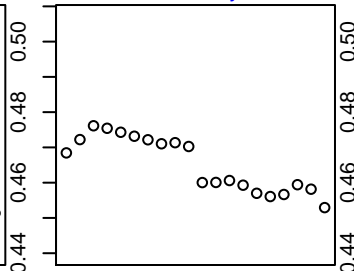

21.24 pbmc

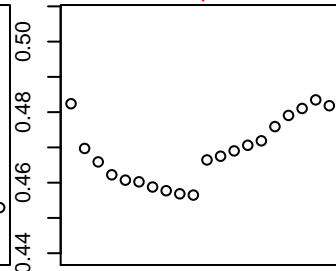

21.25 penis

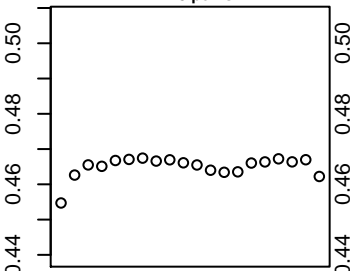

21.26 pituitary

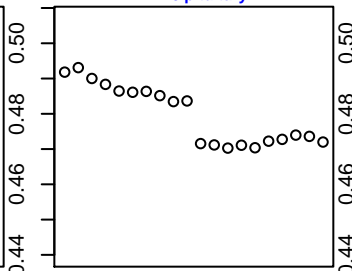

21.27 placenta

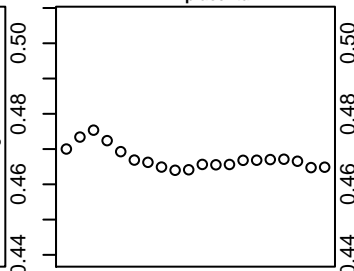

21.28 prostate\_gland

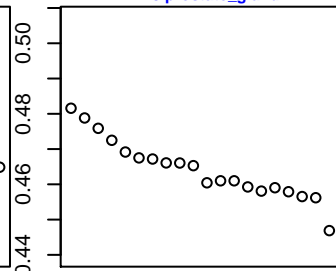

21.29 rectum

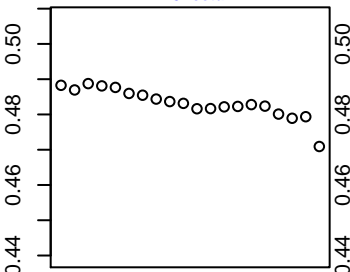

21.30 rectum\_mucosa

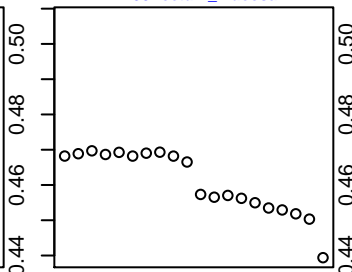

21.31 salivary\_gland

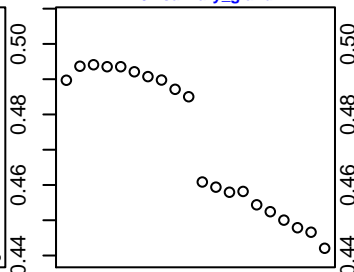

21.32 sigmoid\_colon

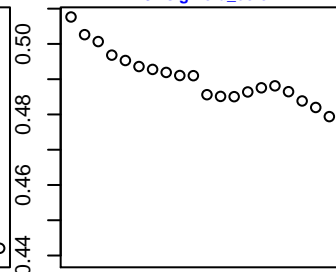

21.33 sinus\_mucosa

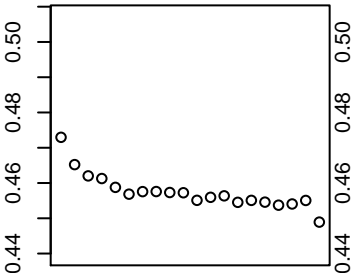

21.34 skeletal\_muscle

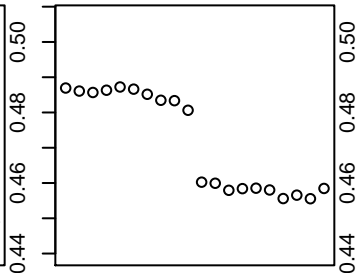

21.35 skin

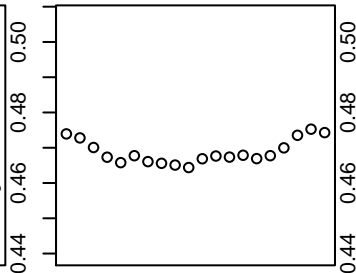

21.36 stomach

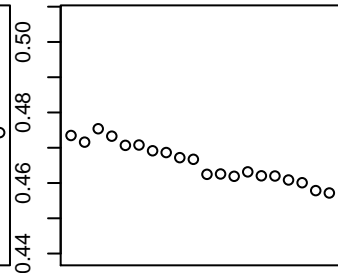

21.37 thyroid

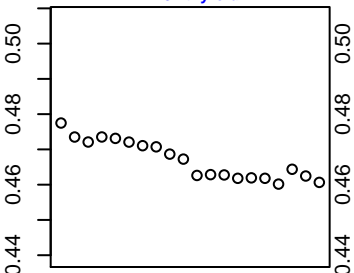

21.38 trigeminal\_ganglia

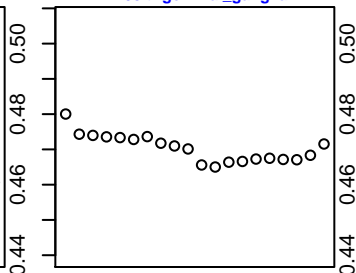



Figure 22. Transcript Size

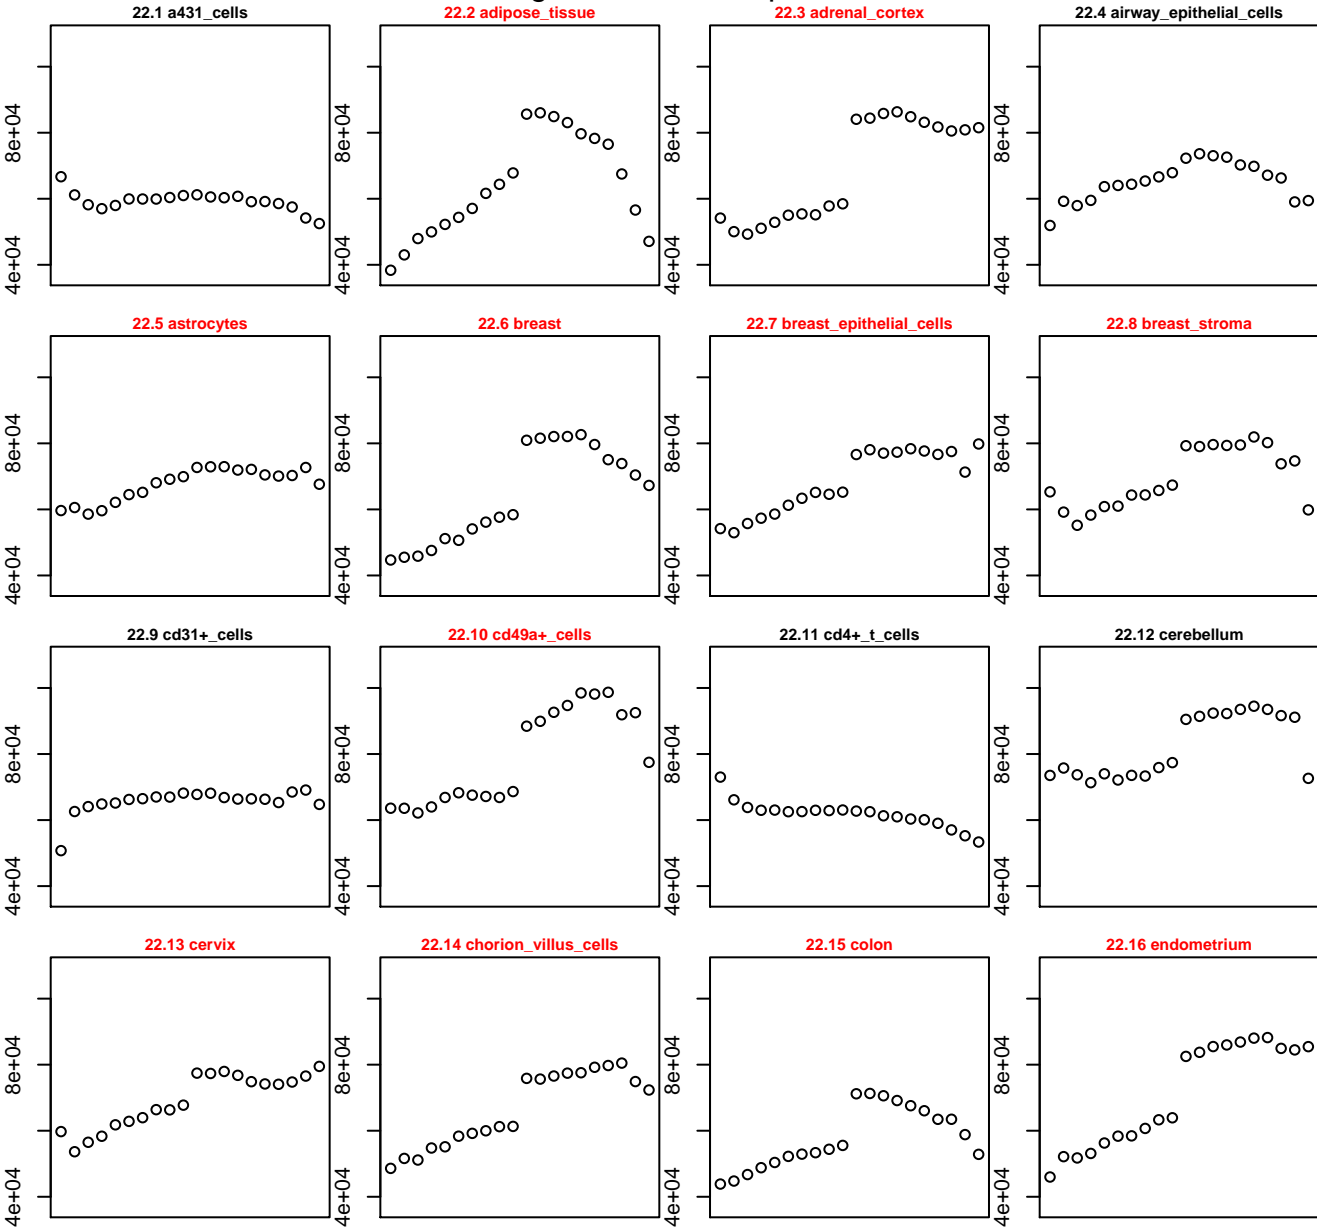

**22.17 fetal\_cartilage**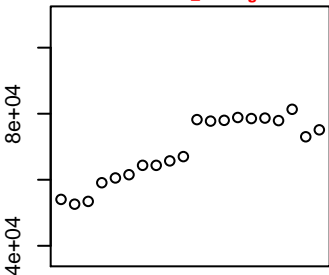**22.18 gingival\_epithelium**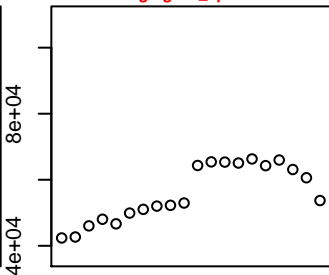**22.19 hippocampus**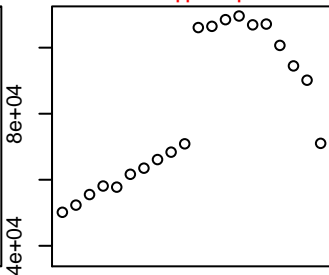**22.20 kidney**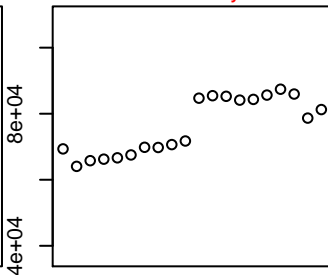**22.21 myometrium**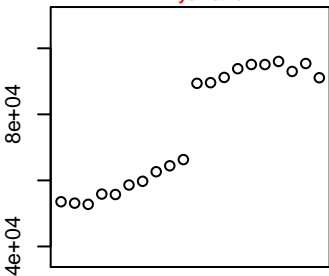**22.22 omental\_adipose\_tissue**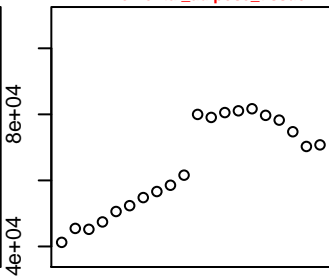**22.23 ovary**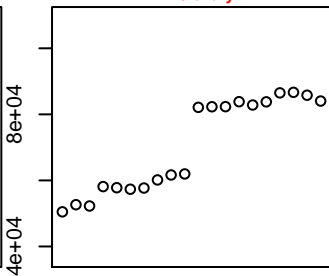**22.24 pbmc**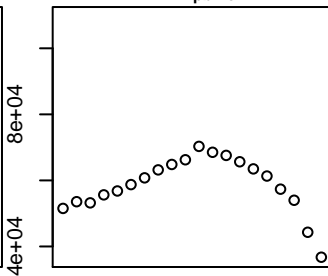**22.25 penis**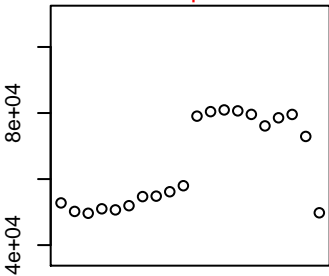**22.26 pituitary**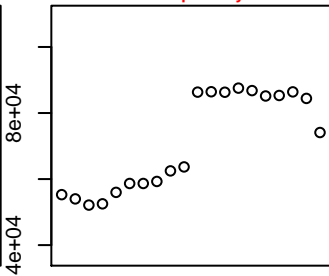**22.27 placenta**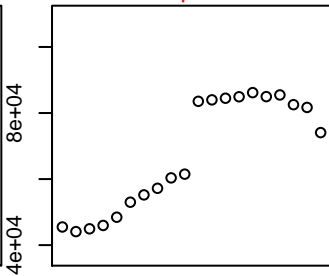**22.28 prostate\_gland**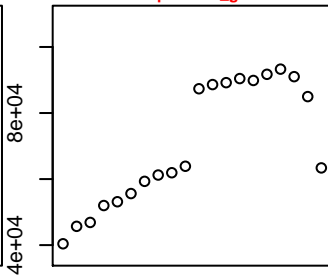**22.29 rectum**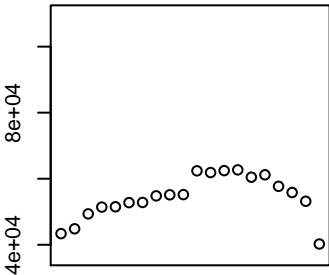**22.30 rectum\_mucosa**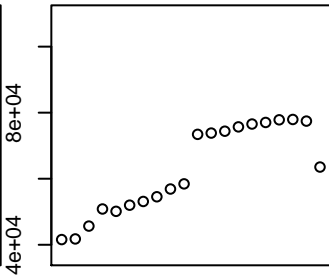**22.31 salivary\_gland**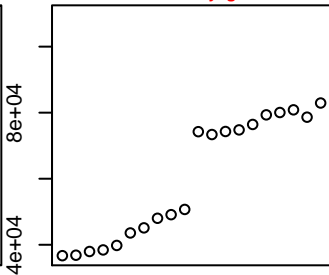**22.32 sigmoid\_colon**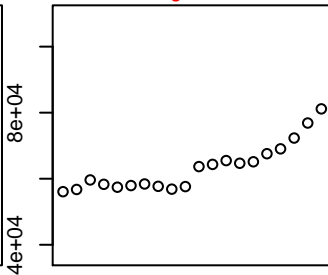

22.33 sinus\_mucosa

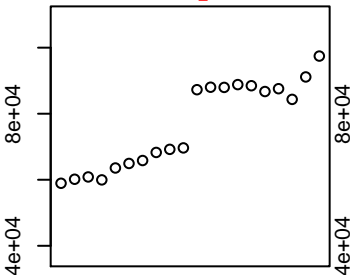

22.34 skeletal\_muscle

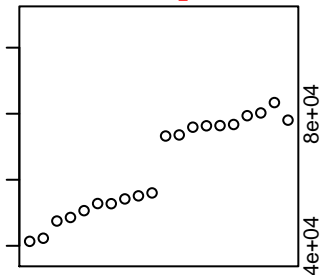

22.35 skin

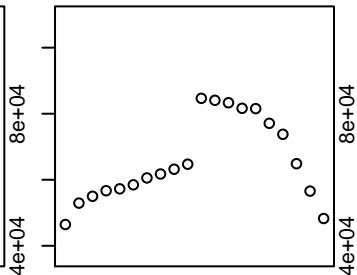

22.36 stomach

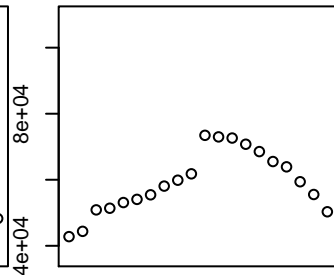

22.37 thyroid

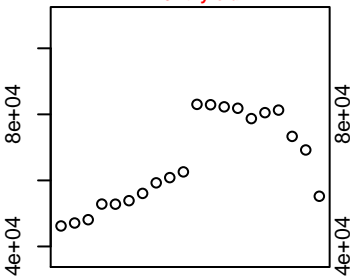

22.38 trigeminal\_ganglia

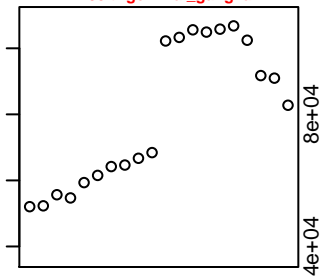

22.39 u251\_cells

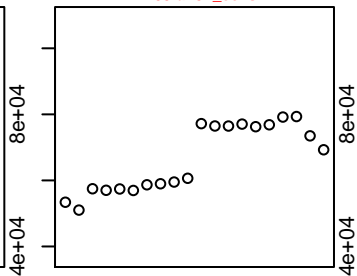

22.40 urethra

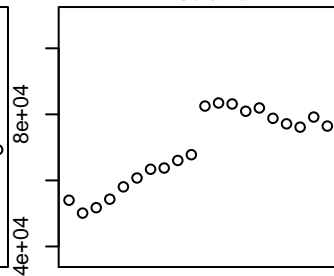

22.41 vulva

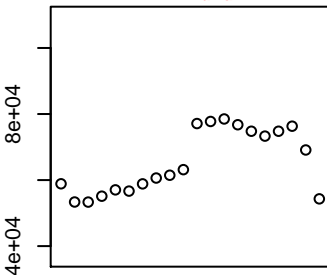

Figure 23. Num of TF clusters with a binding site

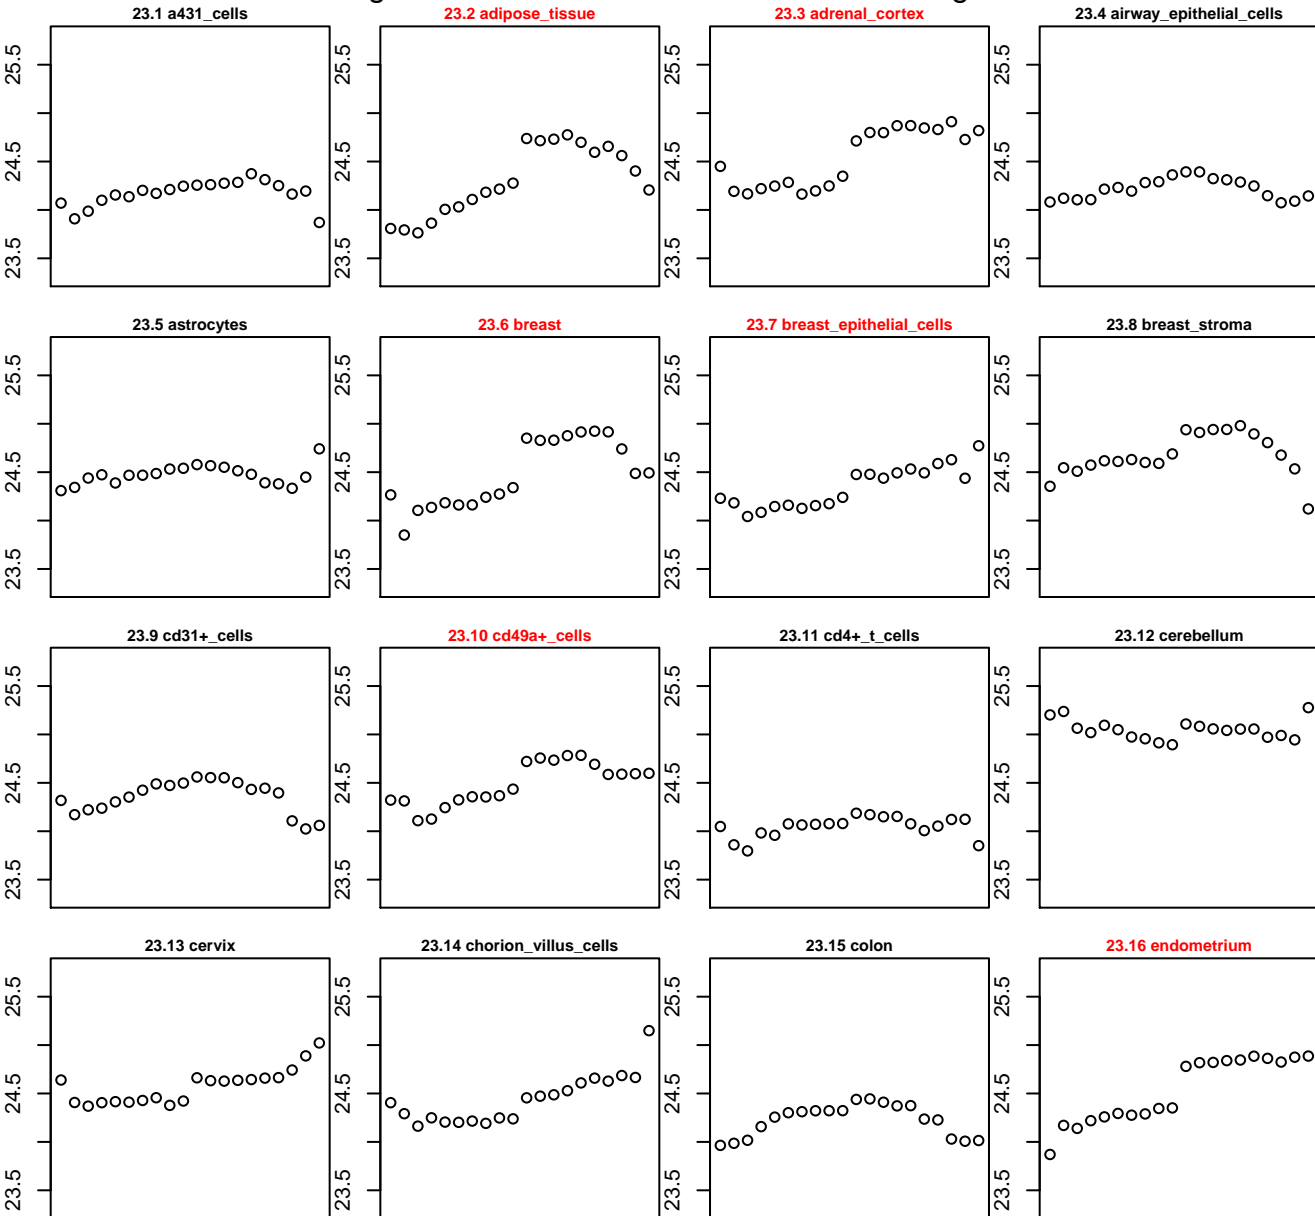

23.17 fetal\_cartilage

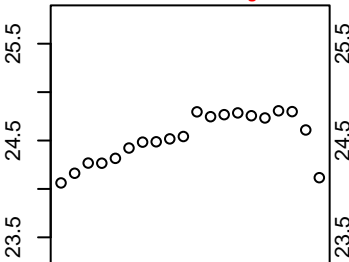

23.18 gingival\_epithelium

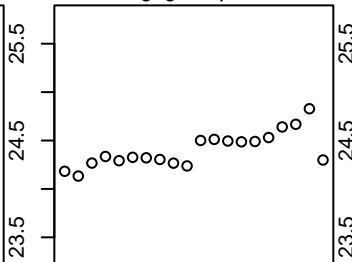

23.19 hippocampus

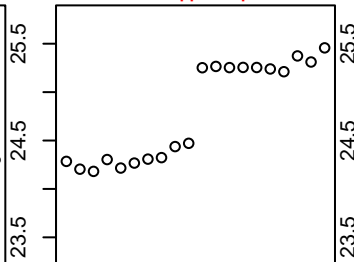

23.20 kidney

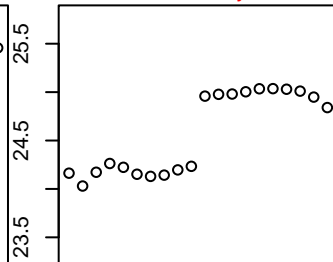

23.21 myometrium

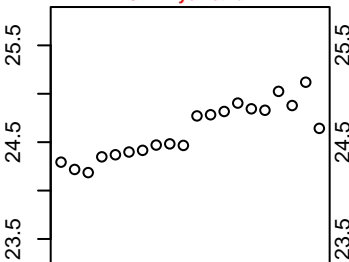

23.22 omental\_adipose\_tissue

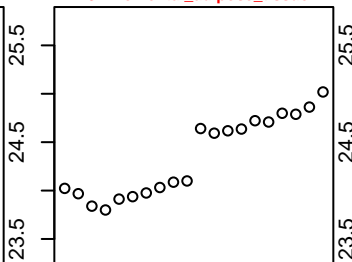

23.23 ovary

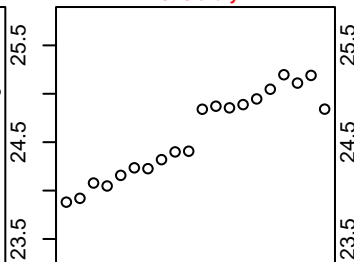

23.24 pbmc

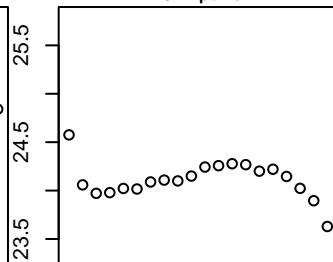

23.25 penis

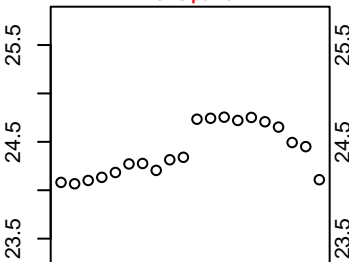

23.26 pituitary

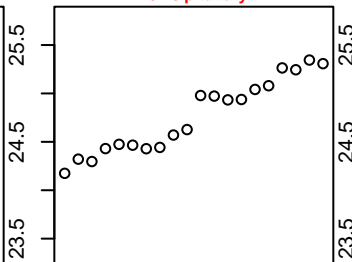

23.27 placenta

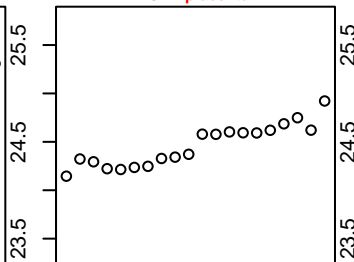

23.28 prostate\_gland

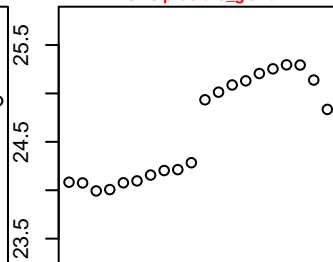

23.29 rectum

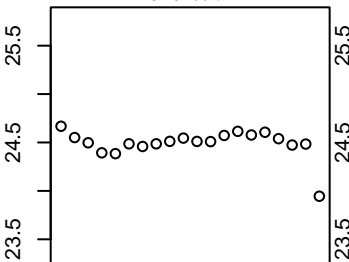

23.30 rectum\_mucosa

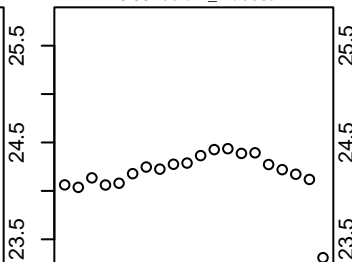

23.31 salivary\_gland

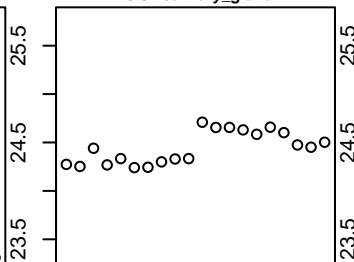

23.32 sigmoid\_colon

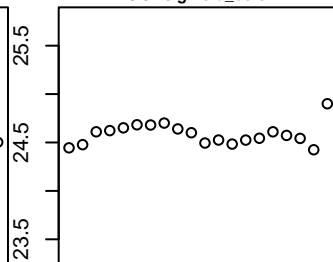

23.33 sinus\_mucosa

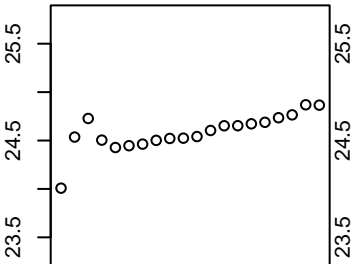

23.34 skeletal\_muscle

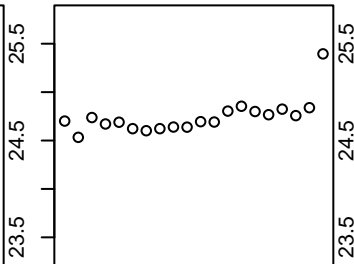

23.35 skin

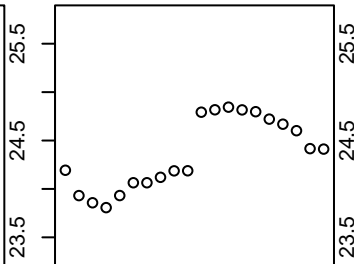

23.36 stomach

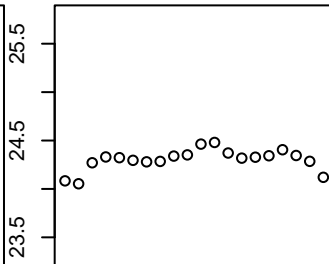

23.37 thyroid

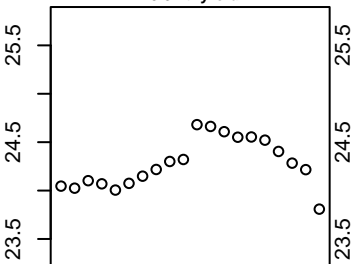

23.38 trigeminal\_ganglia

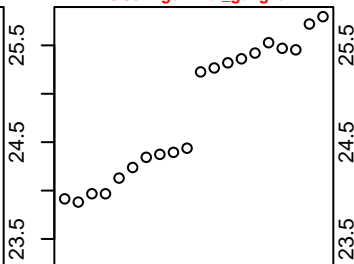

23.39 u251\_cells

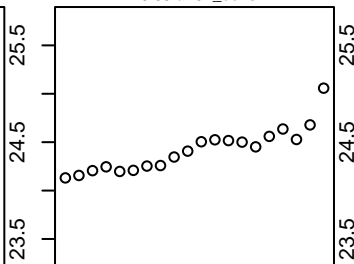

23.40 urethra

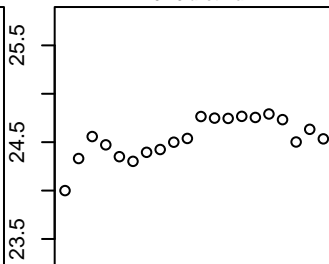

23.41 vulva

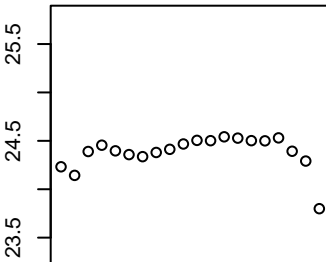

Figure 24. CNV

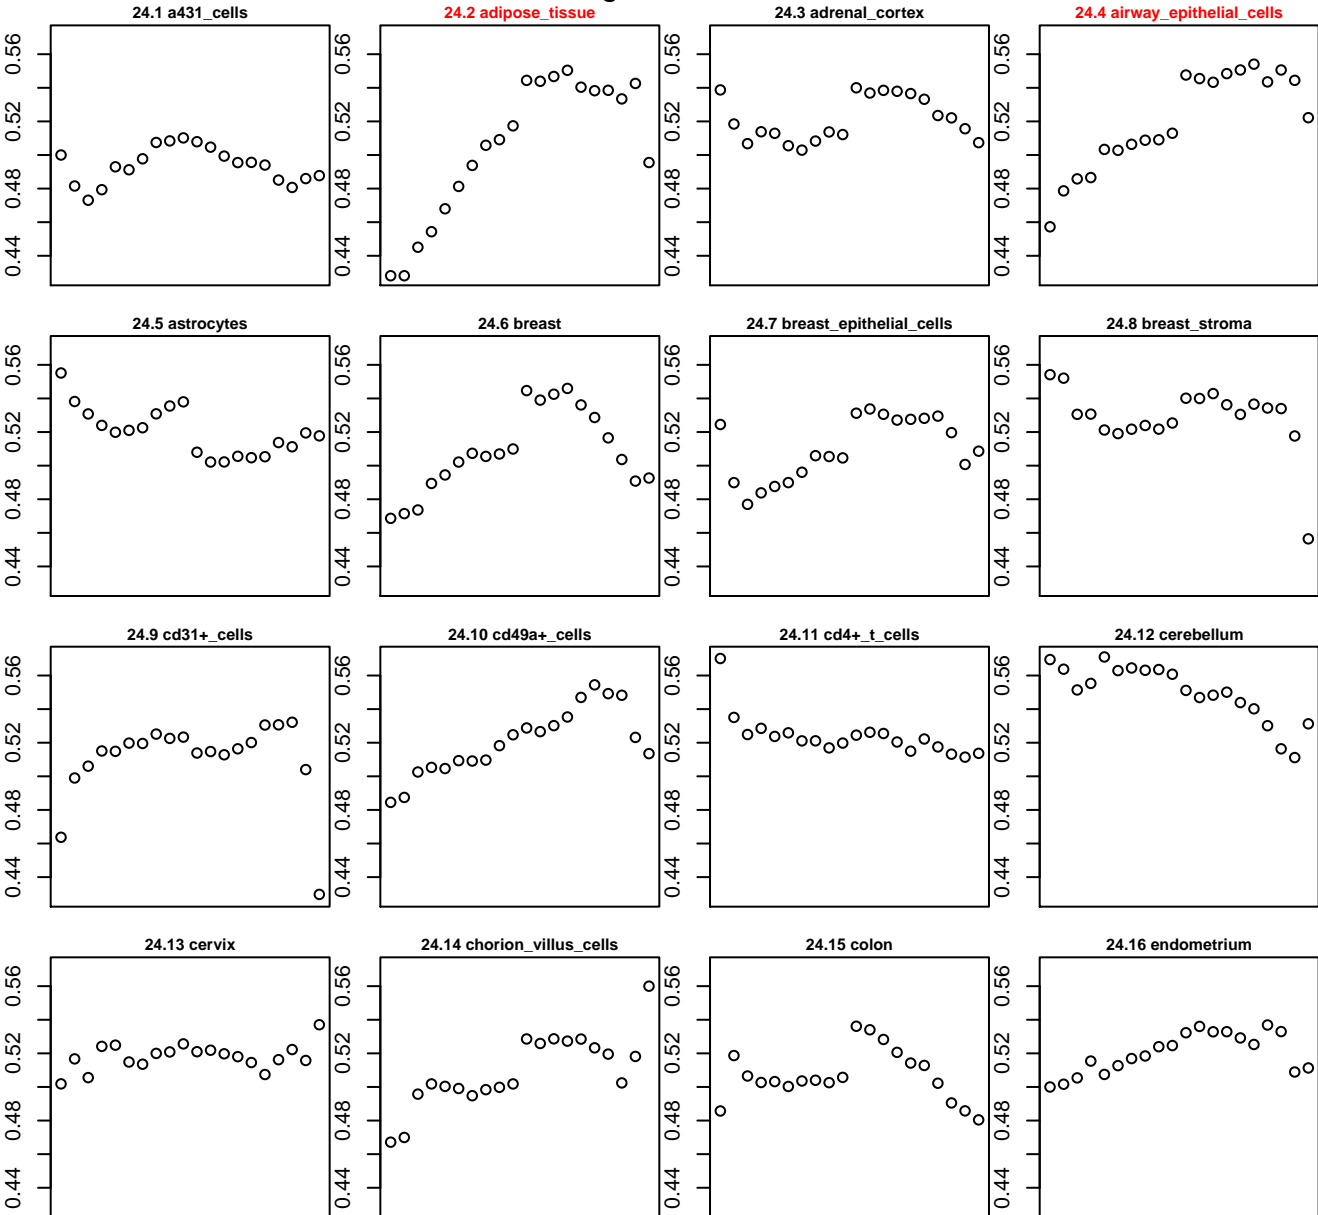

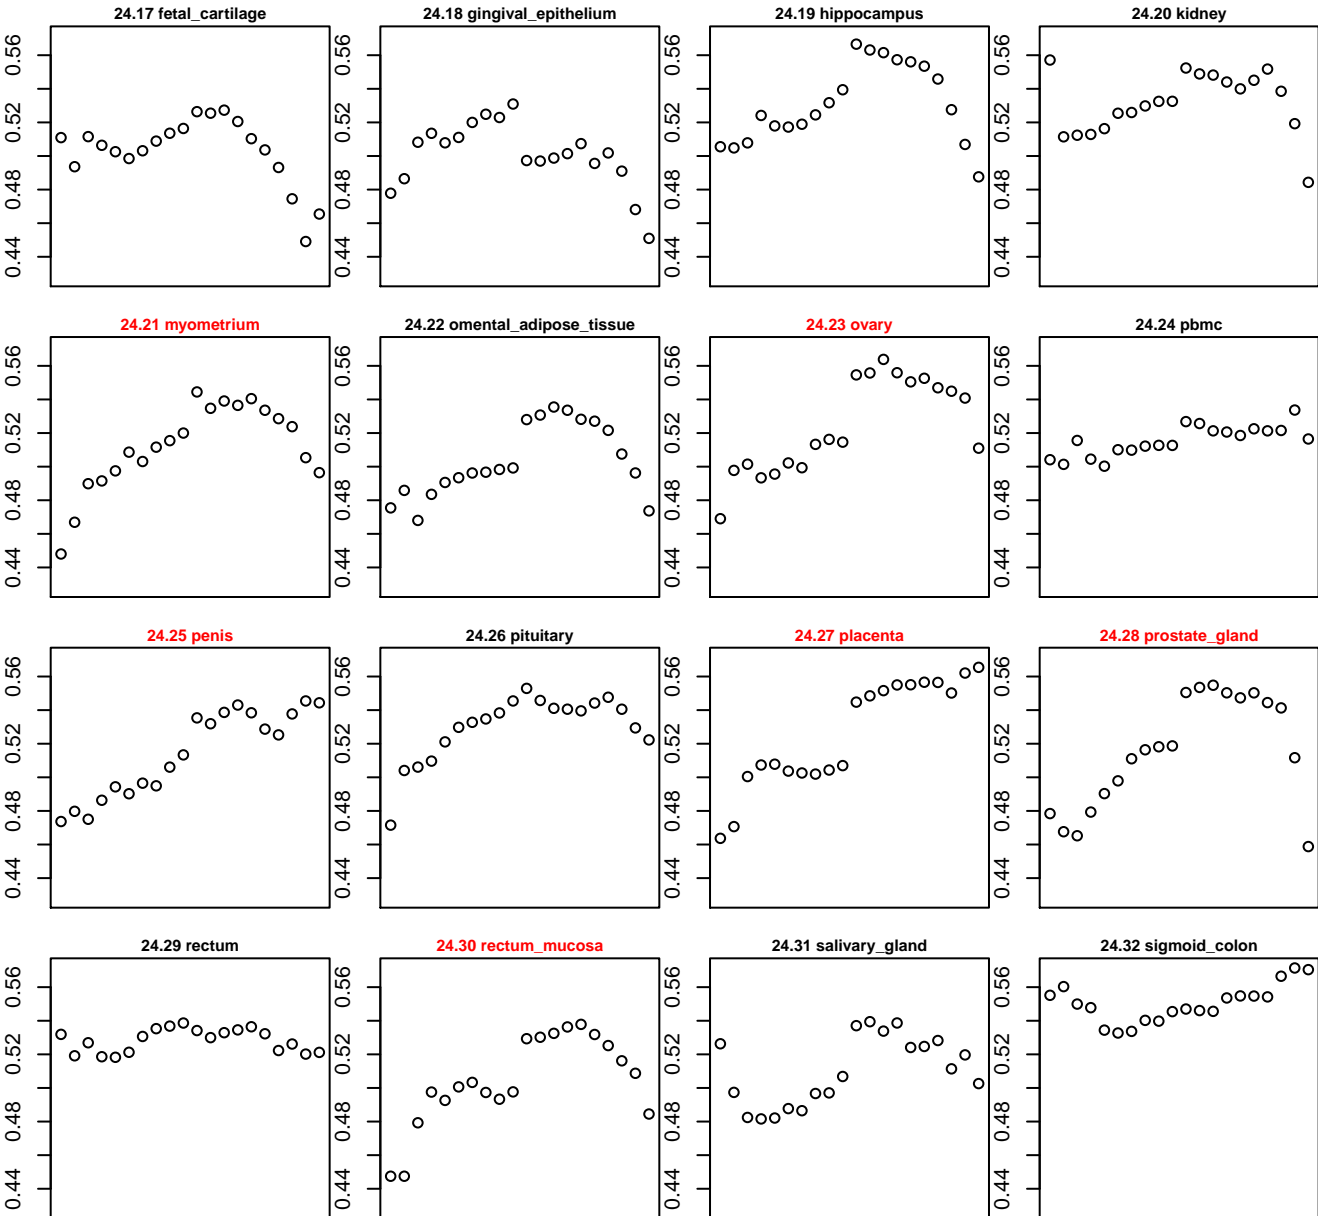



24.33 sinus\_mucosa

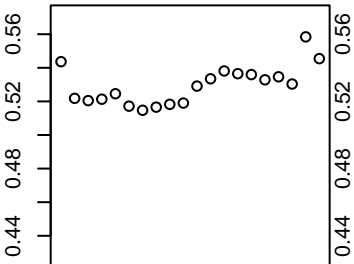

24.34 skeletal\_muscle

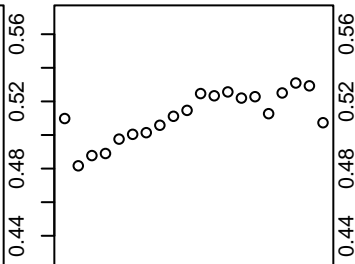

24.35 skin

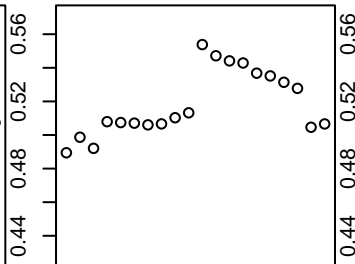

24.36 stomach

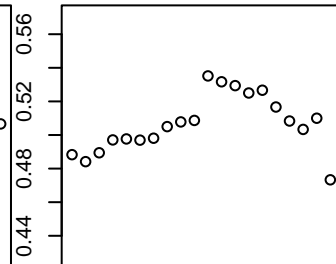

24.37 thyroid

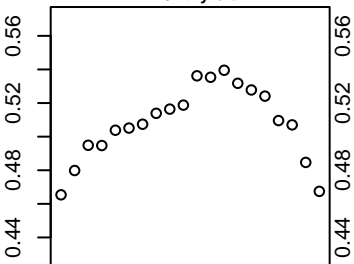

24.38 trigeminal\_ganglia

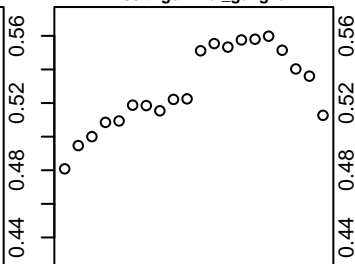

24.39 u251\_cells

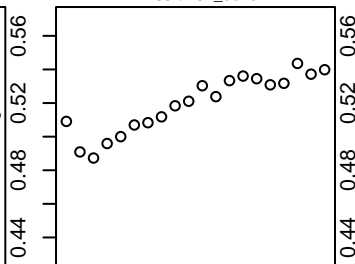

24.40 urethra

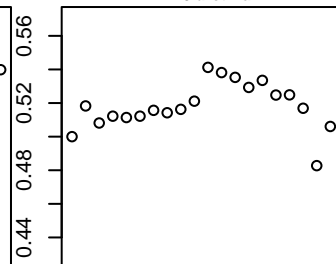

24.41 vulva

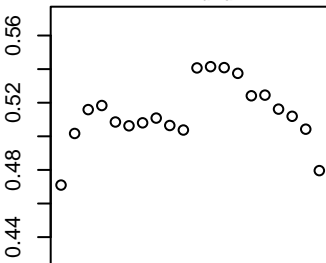

Figure 25. Intrinsic disorder

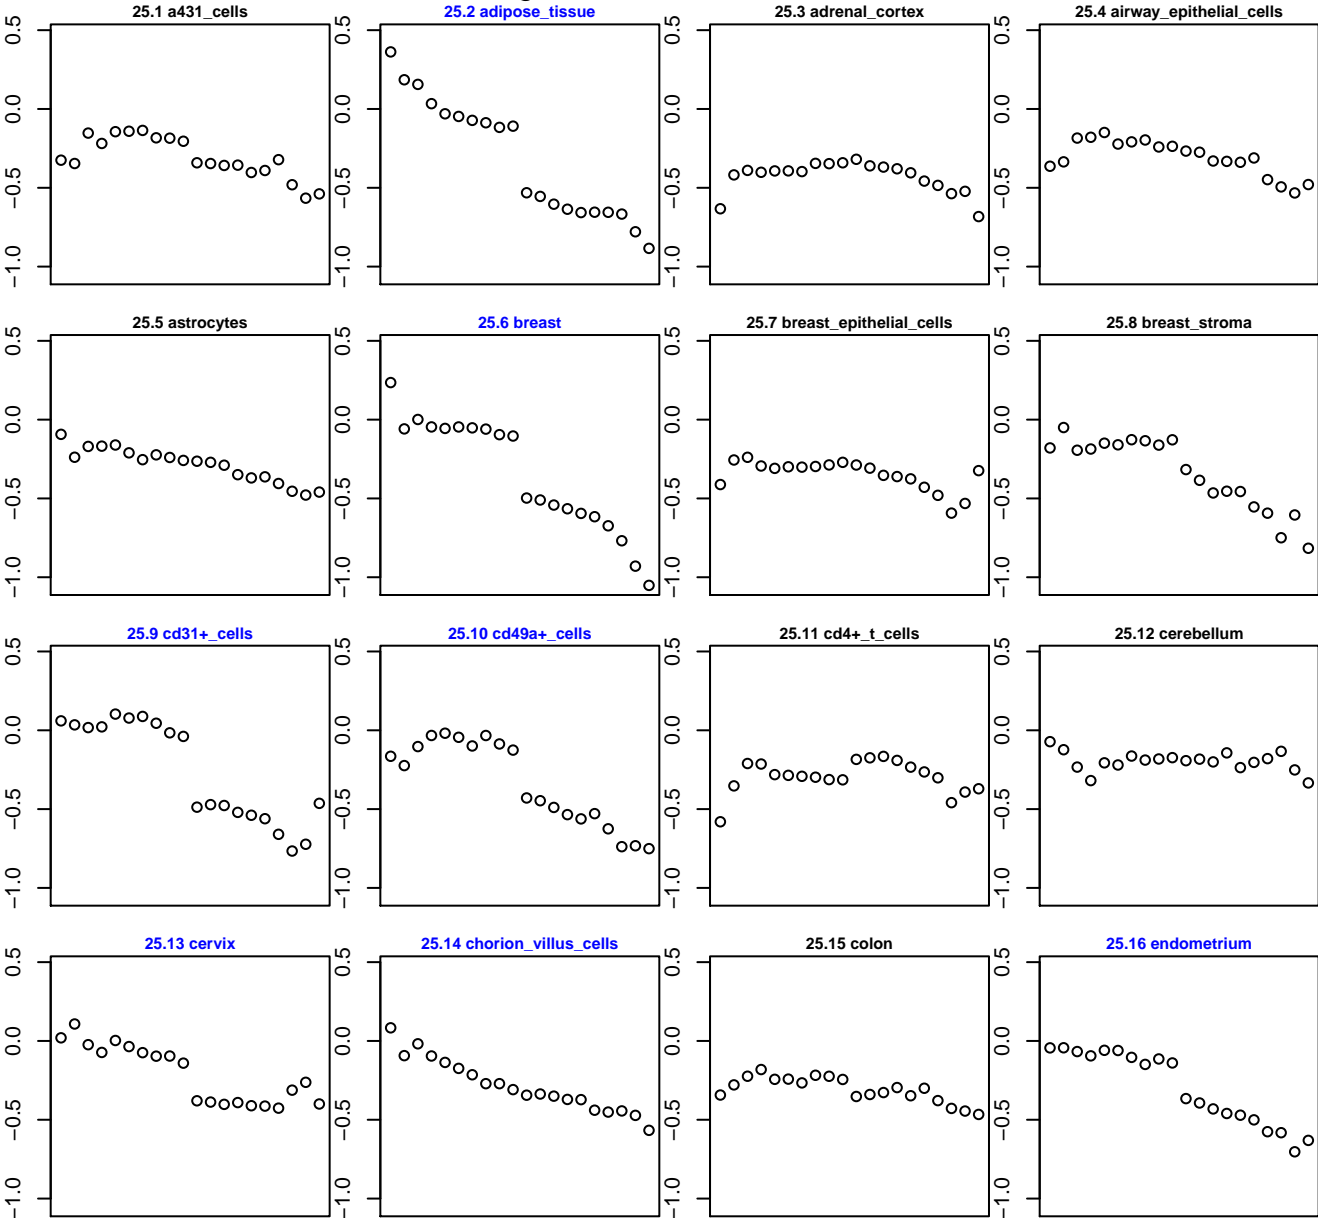

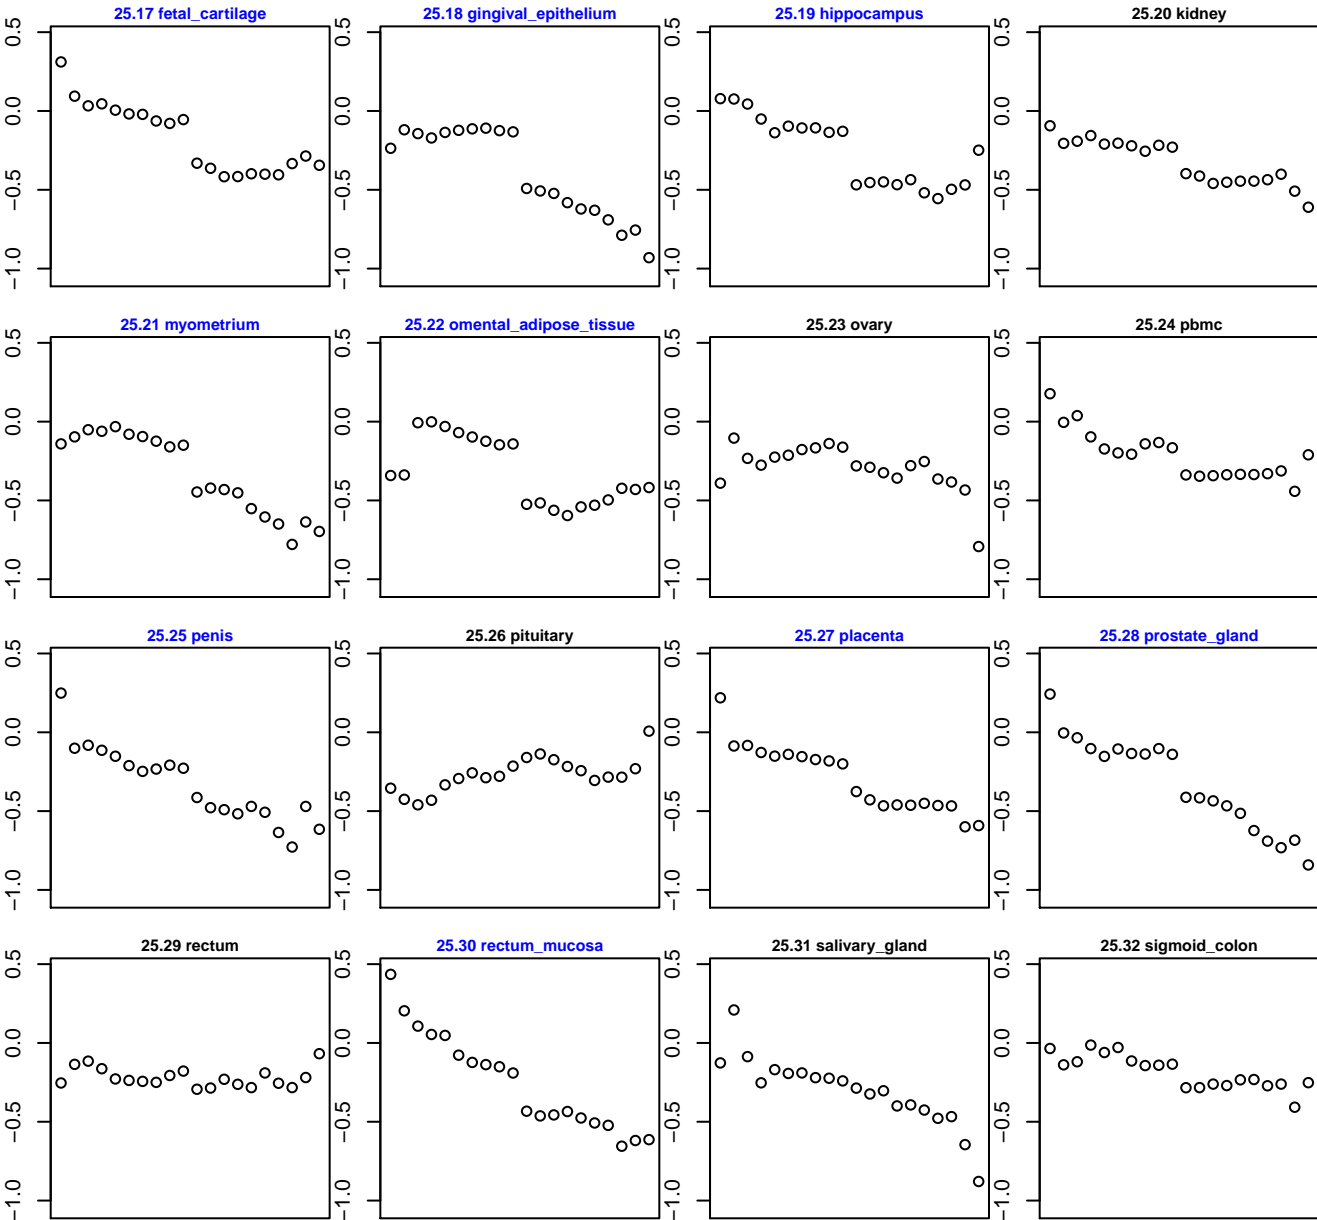

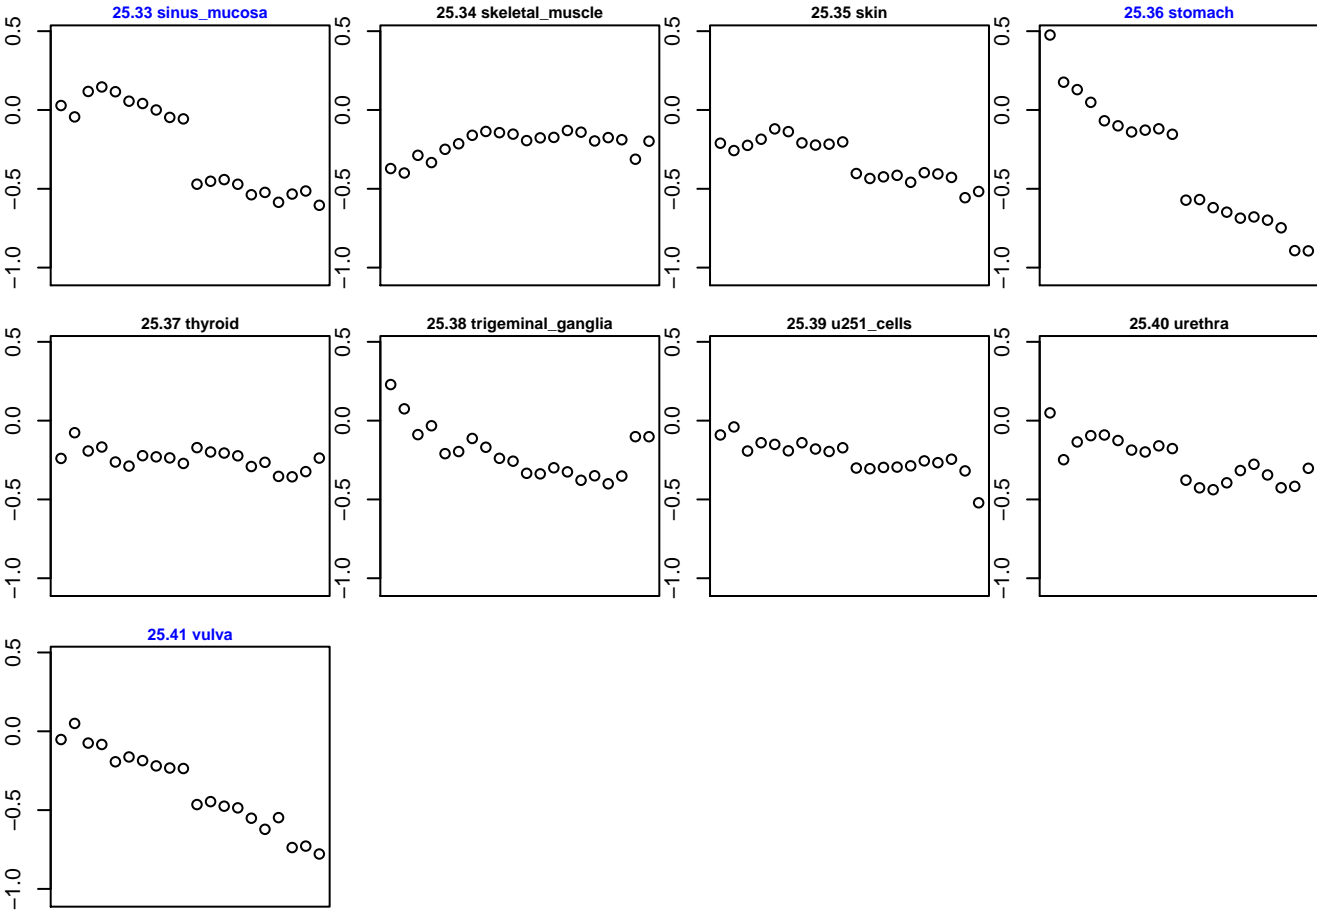

Figure 26. Disease gene fraction

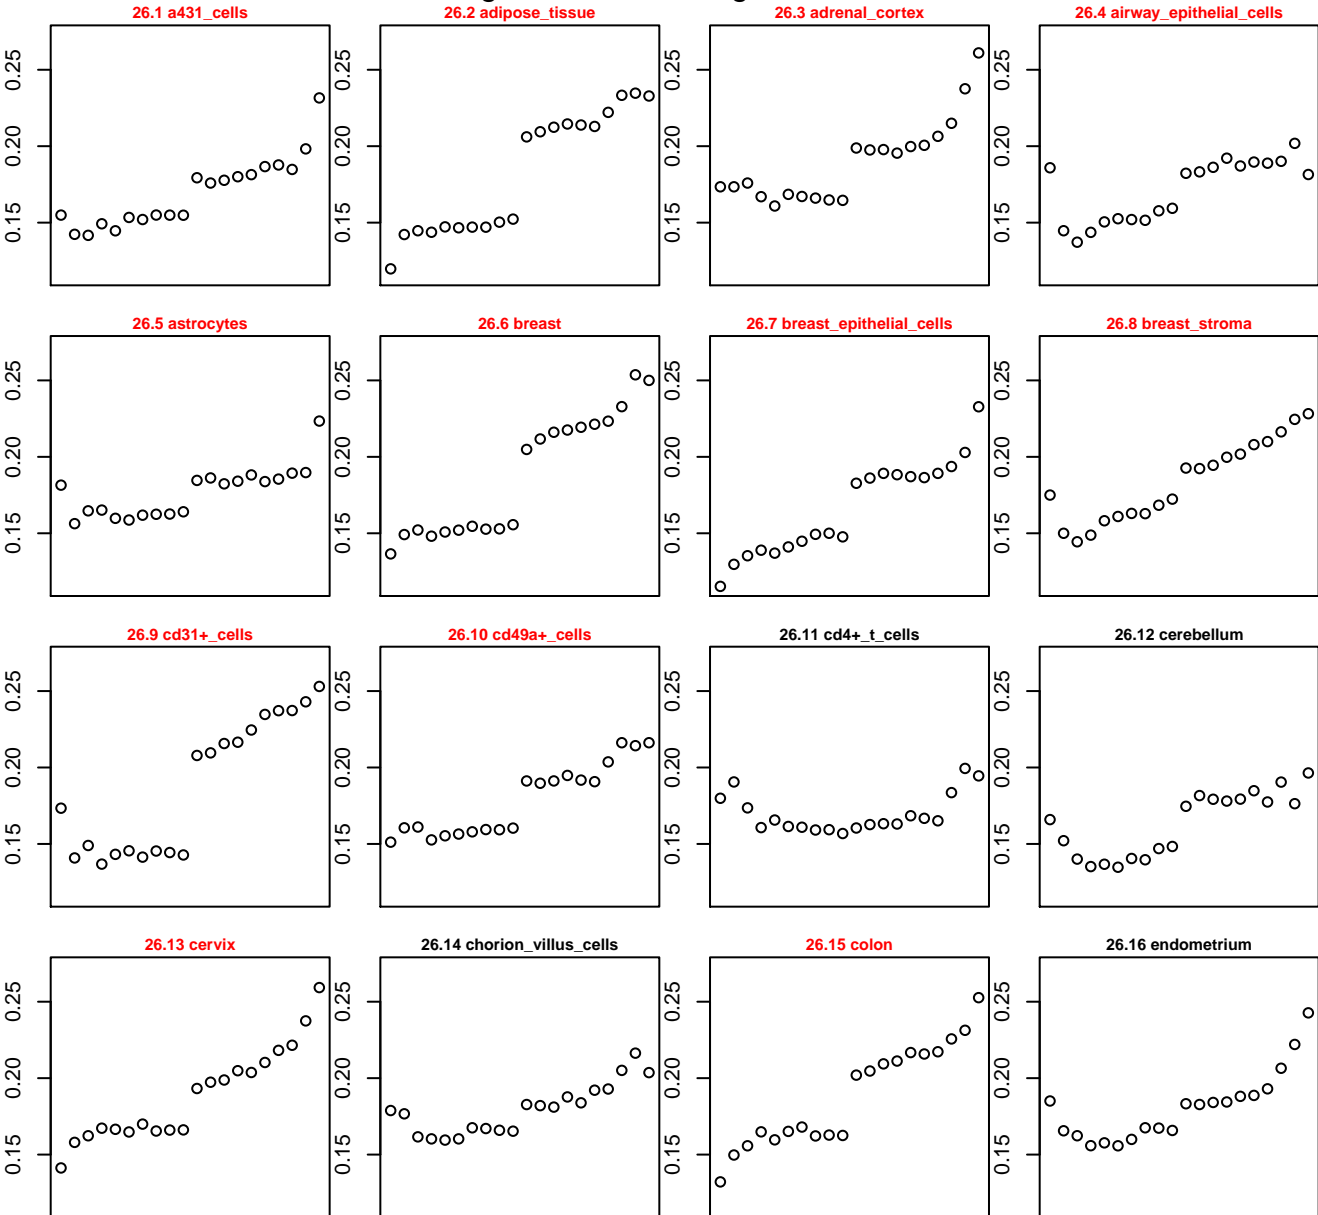

26.17 fetal\_cartilage

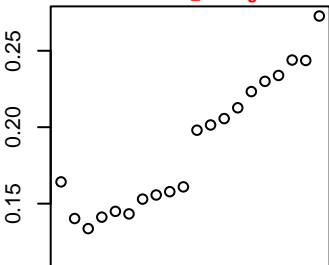

26.18 gingival\_epithelium

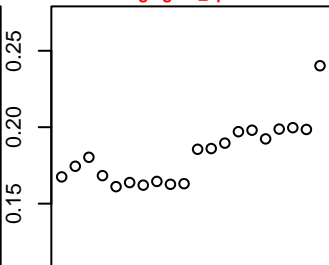

26.19 hippocampus

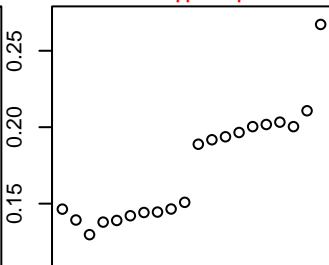

26.20 kidney

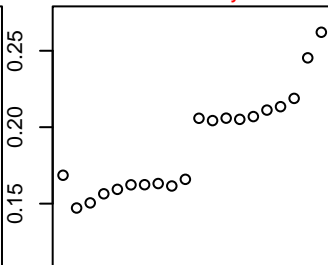

26.21 myometrium

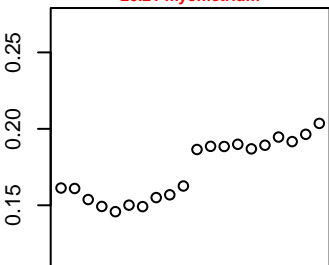

26.22 omental\_adipose\_tissue

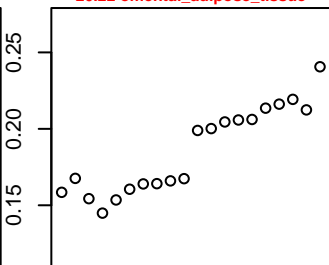

26.23 ovary

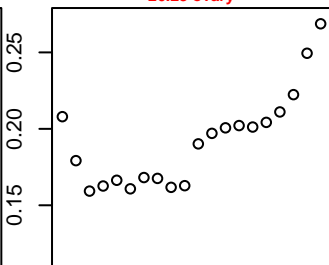

26.24 pbmc

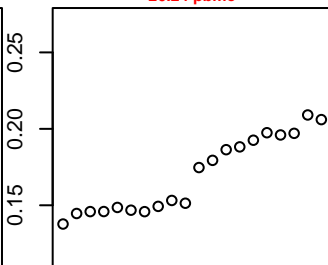

26.25 penis

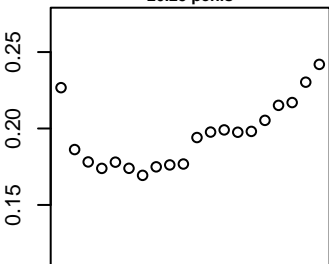

26.26 pituitary

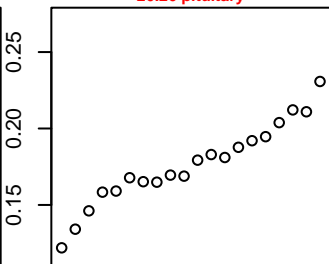

26.27 placenta

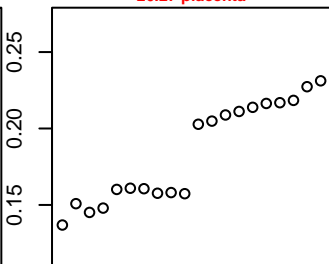

26.28 prostate\_gland

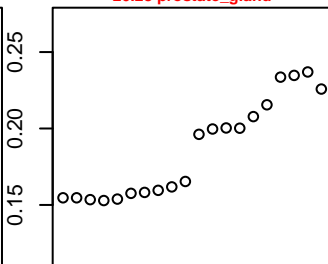

26.29 rectum

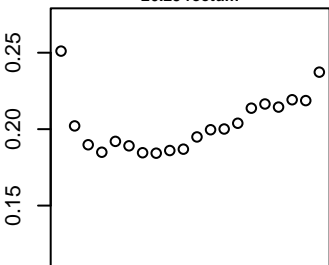

26.30 rectum\_mucosa

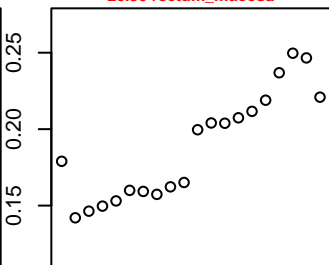

26.31 salivary\_gland

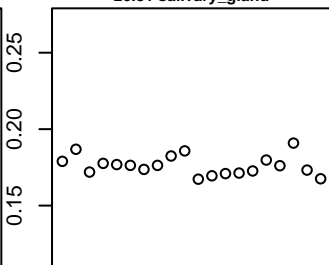

26.32 sigmoid\_colon

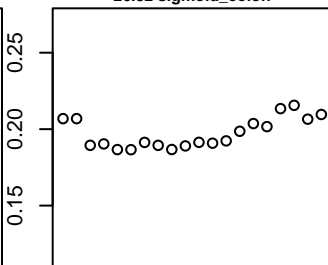

26.33 sinus\_mucosa

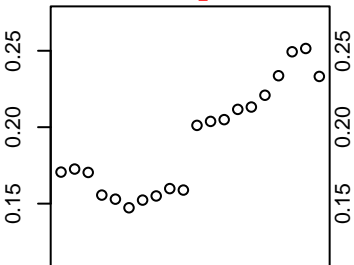

26.34 skeletal\_muscle

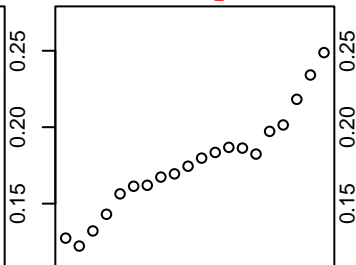

26.35 skin

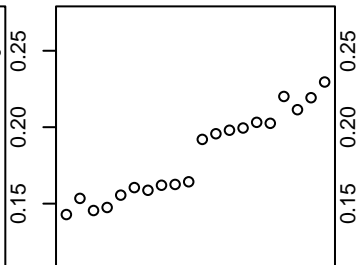

26.36 stomach

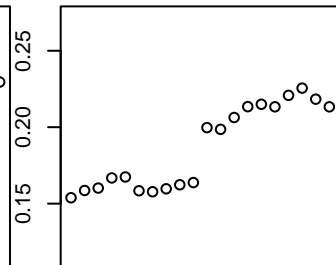

26.37 thyroid

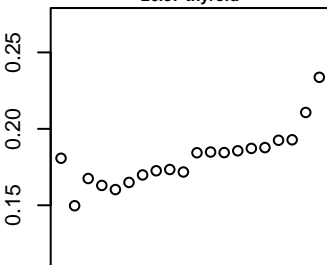

26.38 trigeminal\_ganglia

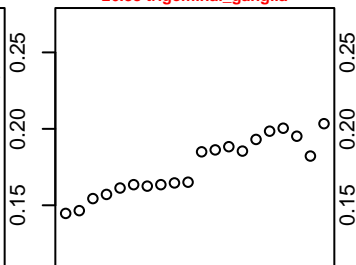

26.39 u251\_cells

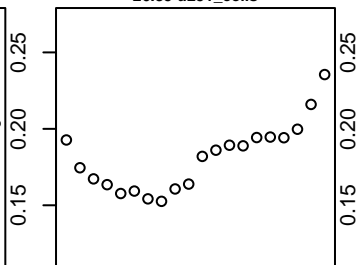

26.40 urethra

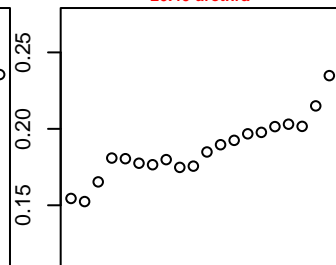

26.41 vulva

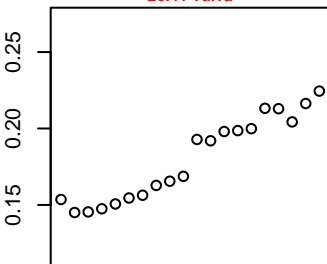

Figure 27. Protein-protein interactions

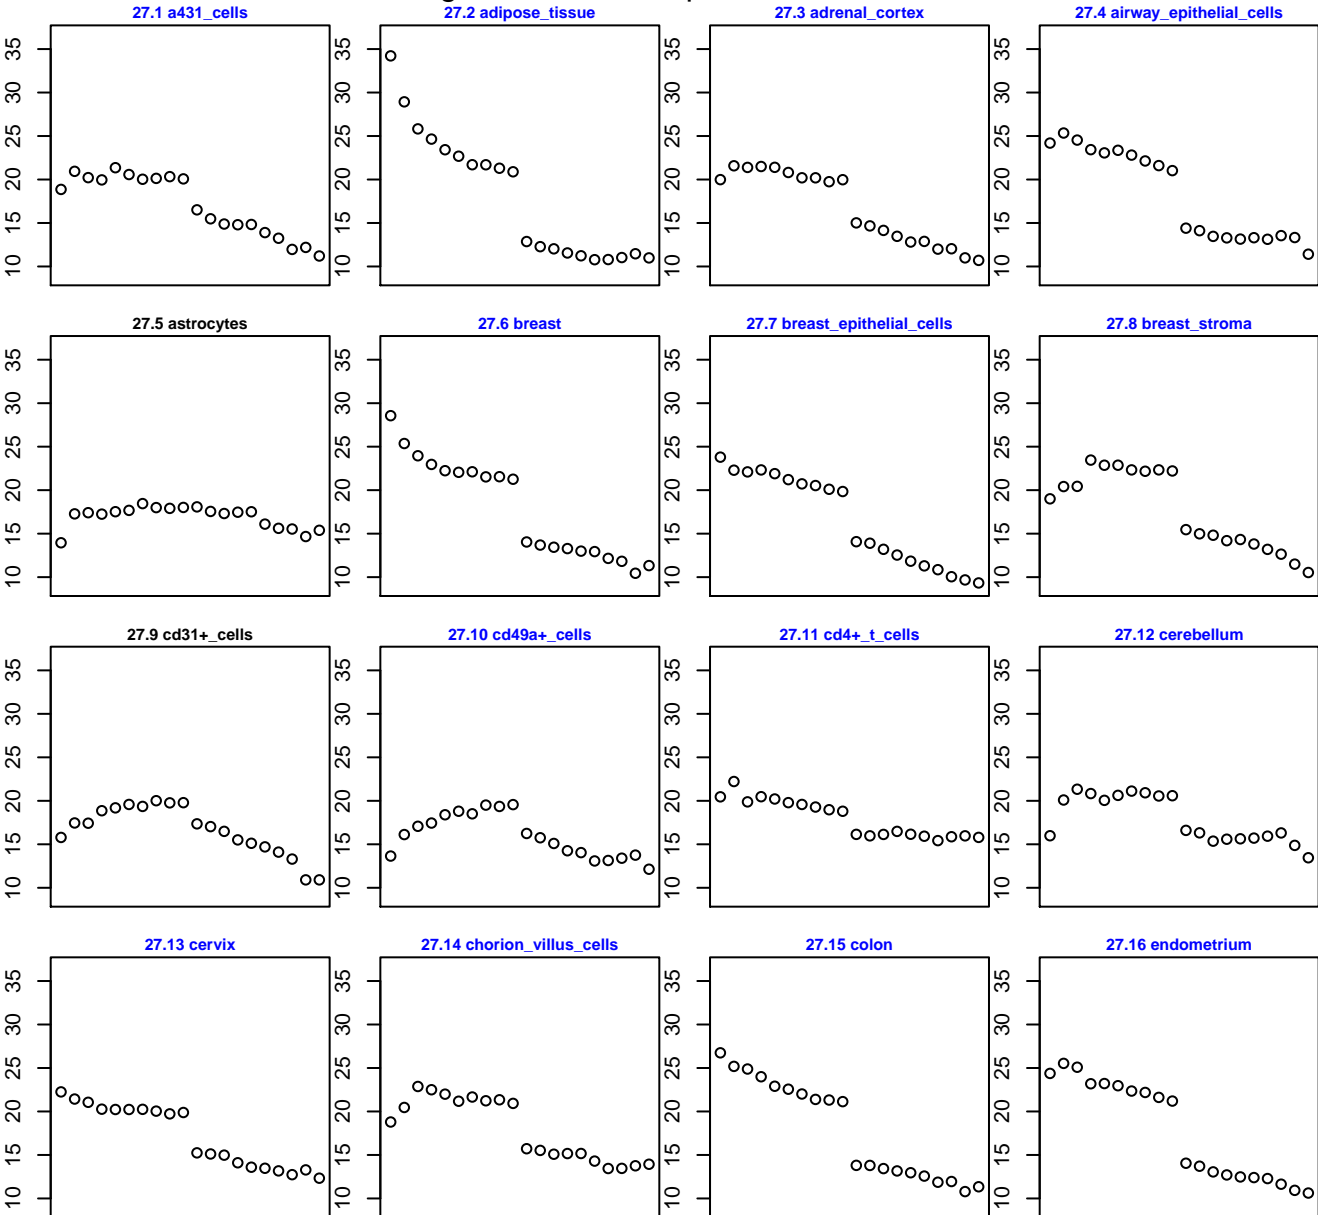



27.17 fetal\_cartilage

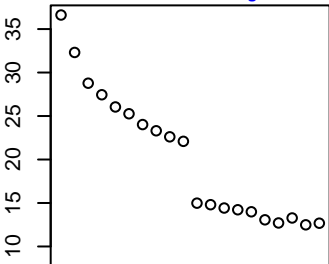

27.18 gingival\_epithelium

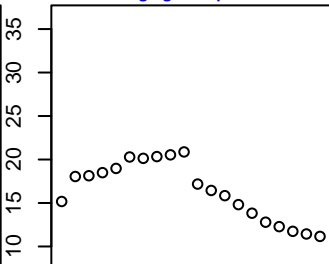

27.19 hippocampus

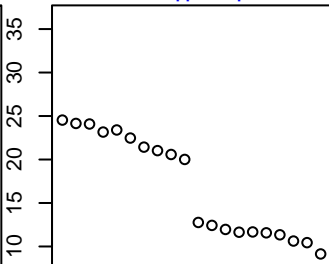

27.20 kidney

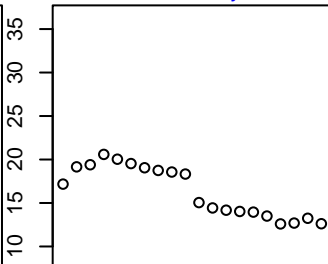

27.21 myometrium

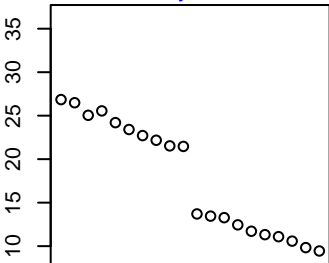

27.22 omental\_adipose\_tissue

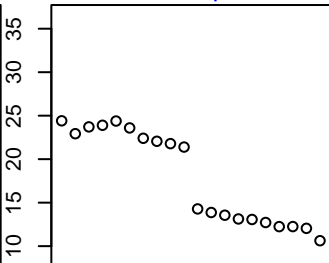

27.23 ovary

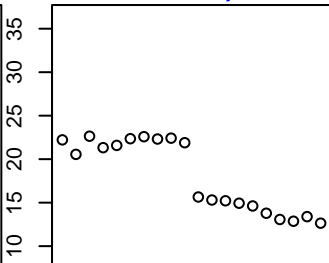

27.24 pbmc

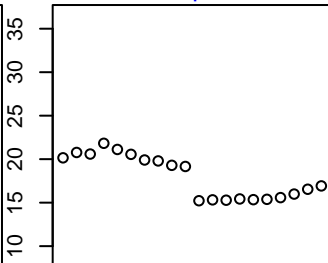

27.25 penis

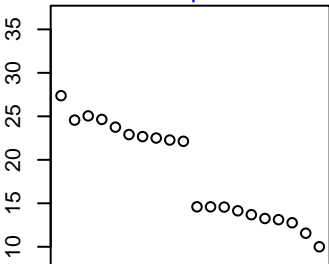

27.26 pituitary

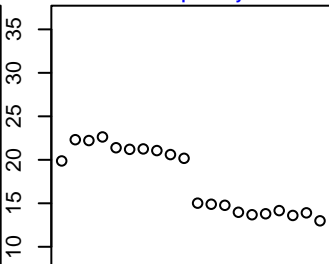

27.27 placenta

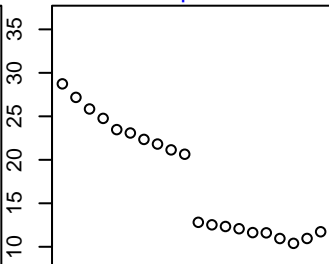

27.28 prostate\_gland

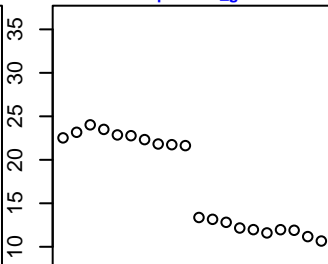

27.29 rectum

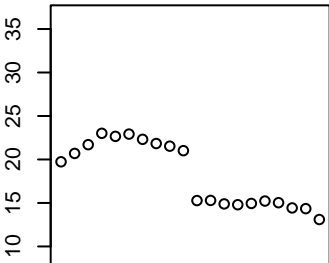

27.30 rectum\_mucosa

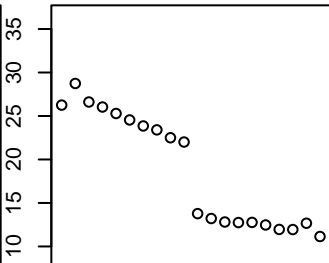

27.31 salivary\_gland

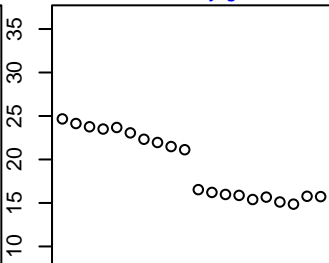

27.32 sigmoid\_colon

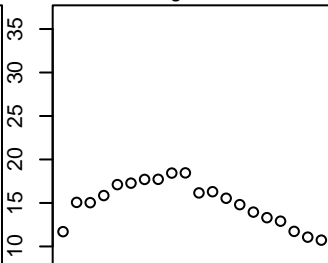

27.33 sinus\_mucosa

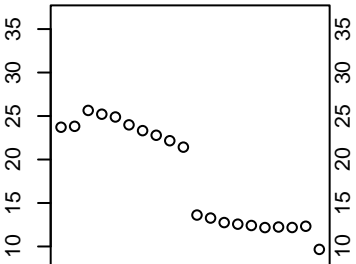

27.34 skeletal\_muscle

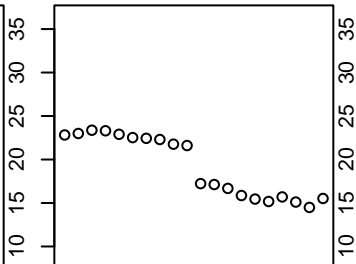

27.35 skin

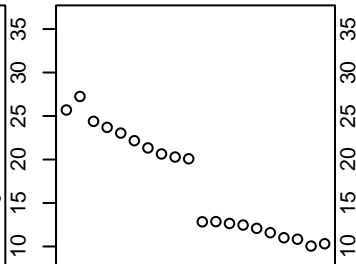

27.36 stomach

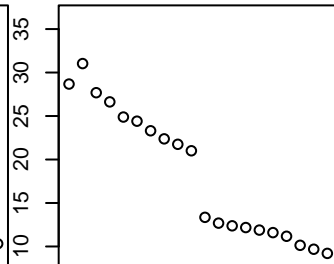

27.37 thyroid

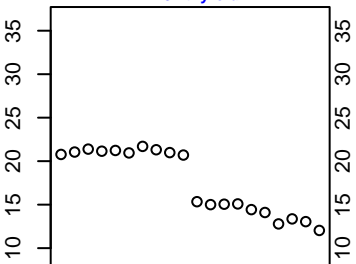

27.38 trigeminal\_ganglia

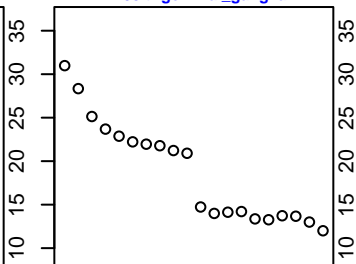

27.39 u251\_cells

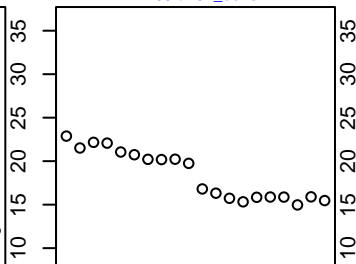

27.40 urethra

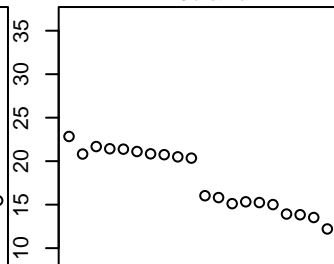

27.41 vulva

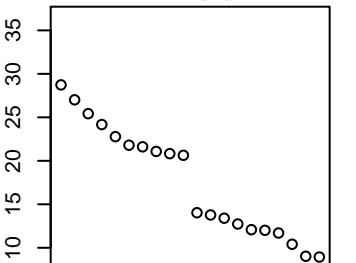

Figure 28. miRNA

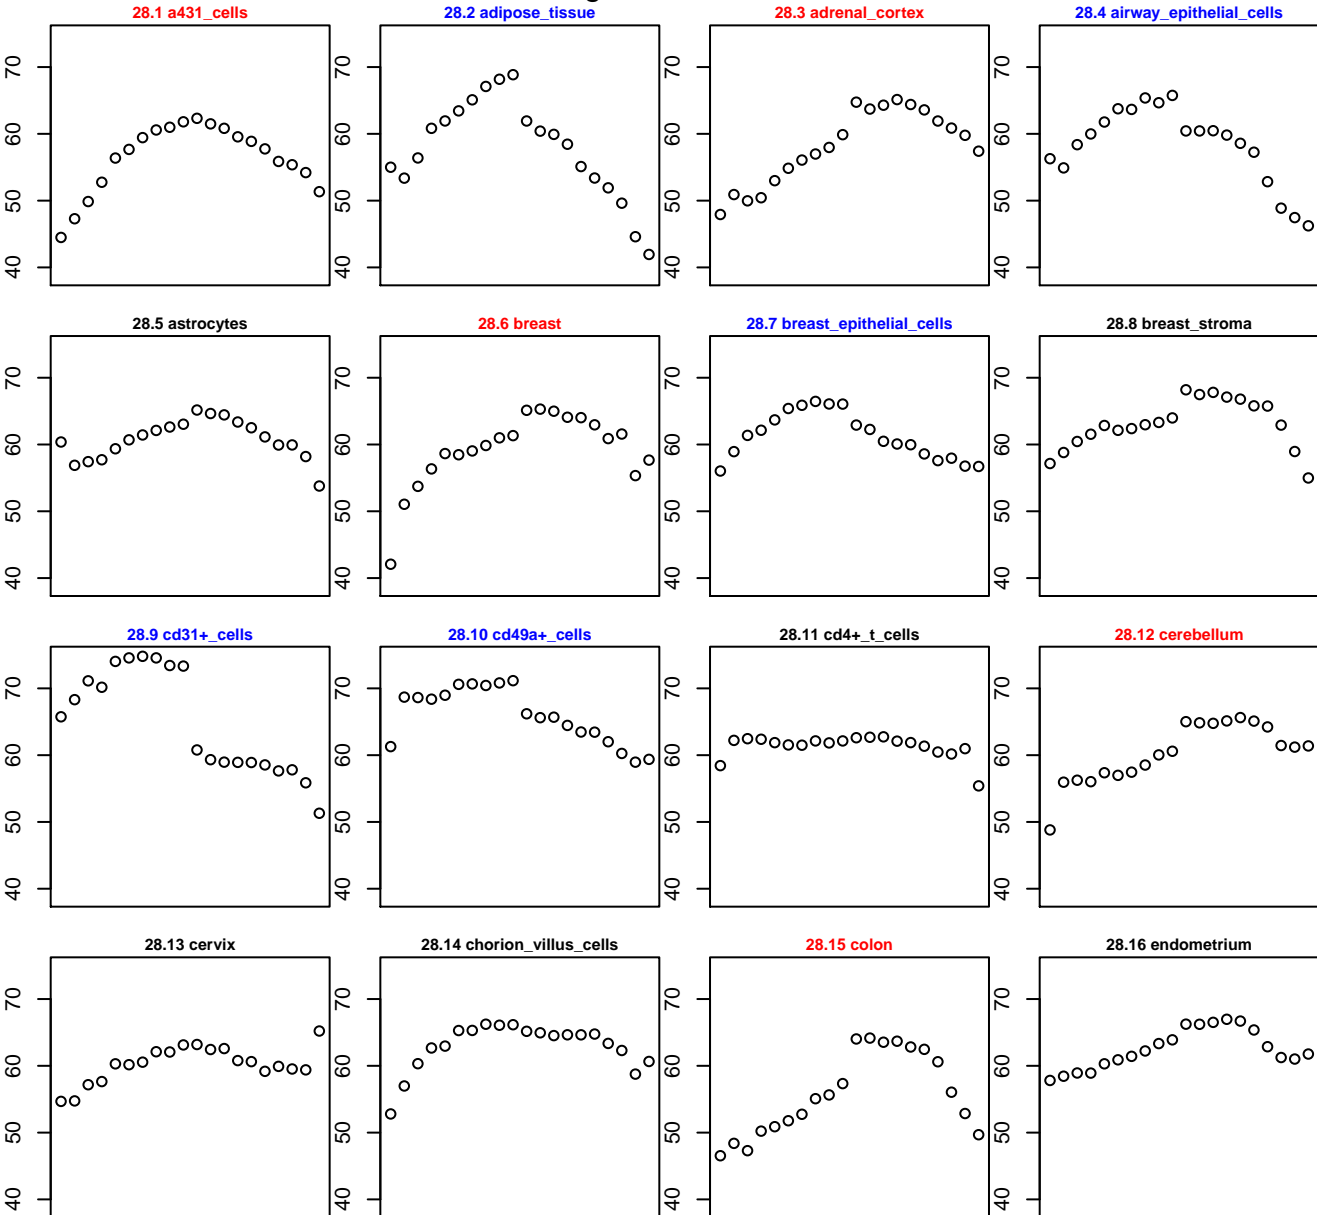

28.17 fetal\_cartilage

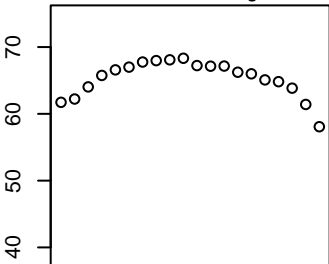

28.18 gingival\_epithelium

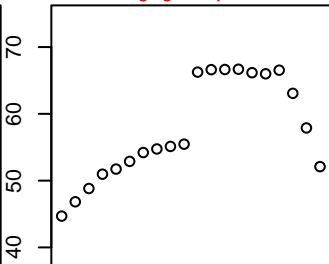

28.19 hippocampus

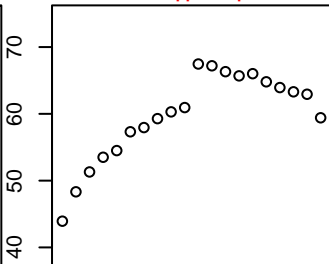

28.20 kidney

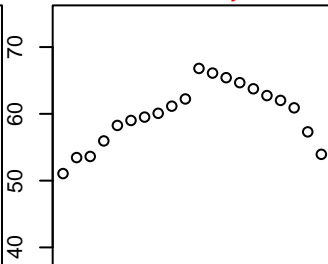

28.21 myometrium

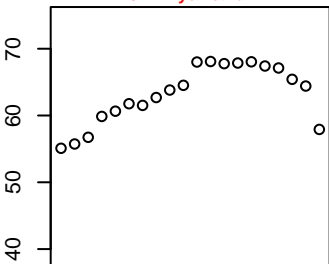

28.22 omental\_adipose\_tissue

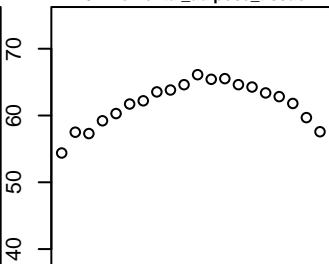

28.23 ovary

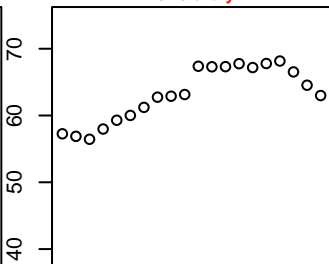

28.24 pbmc

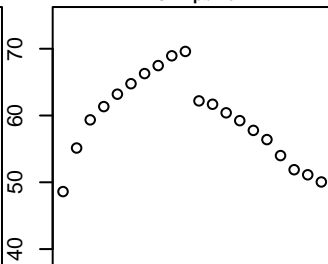

28.25 penis

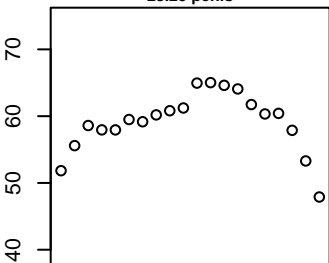

28.26 pituitary

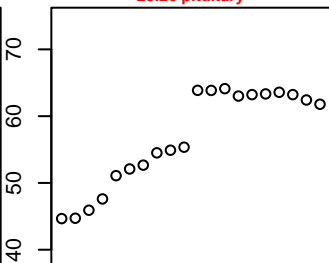

28.27 placenta

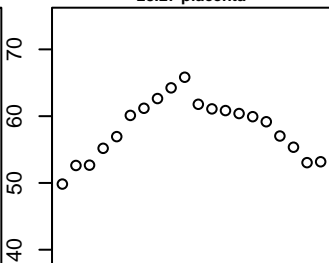

28.28 prostate\_gland

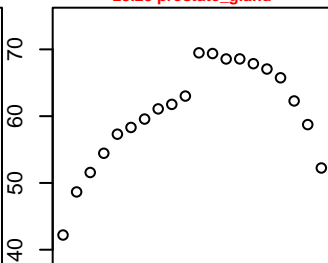

28.29 rectum

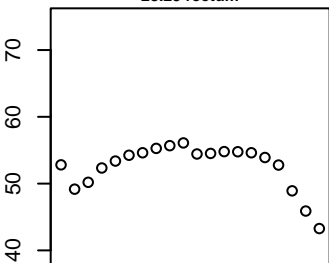

28.30 rectum\_mucosa

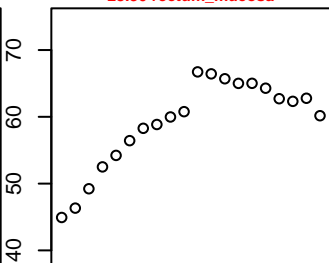

28.31 salivary\_gland

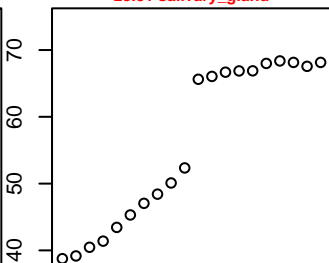

28.32 sigmoid\_colon

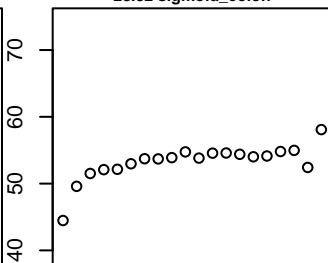

28.33 sinus\_mucosa

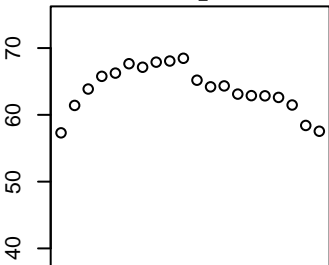

28.34 skeletal\_muscle

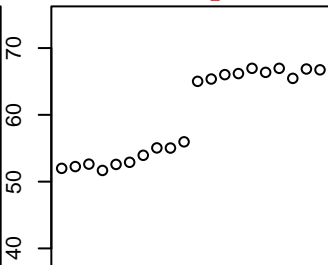

28.35 skin

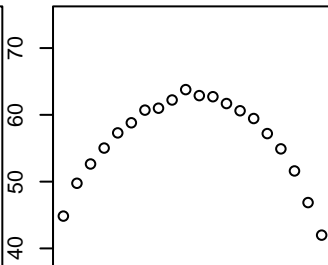

28.36 stomach

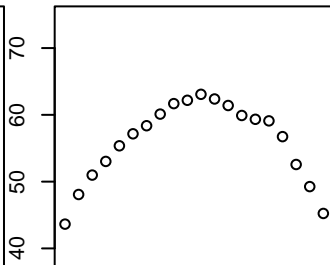

28.37 thyroid

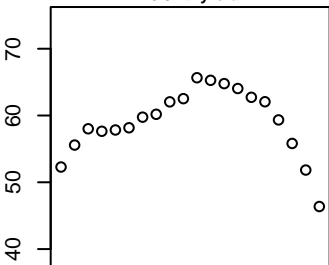

28.38 trigeminal\_ganglia

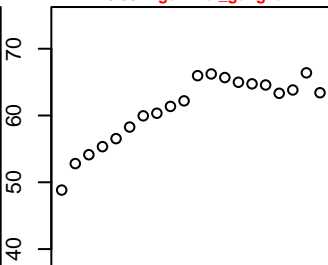

28.39 u251\_cells

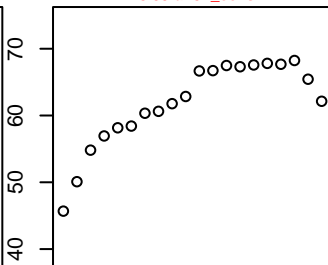

28.40 urethra

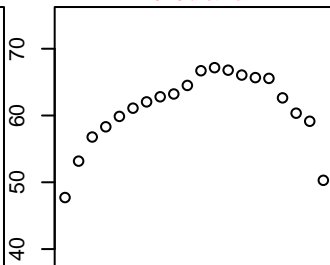

28.41 vulva

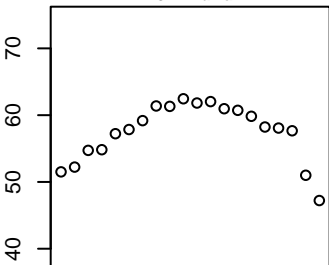

Supplement: supp_gkt1364_nar-02587-n-2013-File005.pdf [file supp_gkt1364_nar-02587-n-2013-File005.pdf]
