# Supplementary material for: Determinants of expression variability
Source: PubMed Central journal article supplement — Nucleic Acids Res. 2014 Jan 15;42(6):3503–14. doi: 10.1093/nar/gkt1364 (PMC3973347; doi:10.1093/nar/gkt1364), 2014-01-15
Supplement: supp_gkt1364_nar-02587-n-2013-File006.pdf [file supp_gkt1364_nar-02587-n-2013-File006.pdf]

### Supplement 3.

**Figure 1.** EV removes dependence between variability and overall mean expression      Page 2  
**Figure 2.** EV is independent of the number of experiments per tissue in dataset      Page 43

**Figure 1. EV removes dependence between variability and overall mean expression.** The EV measure is unbiased with respect to overall mean expression. We compare the distribution of EV conditional on mean expression for each tissue to the distribution of the coefficient of variation conditional on mean expression. The coefficient of variation shows high upward bias towards genes with low expression.

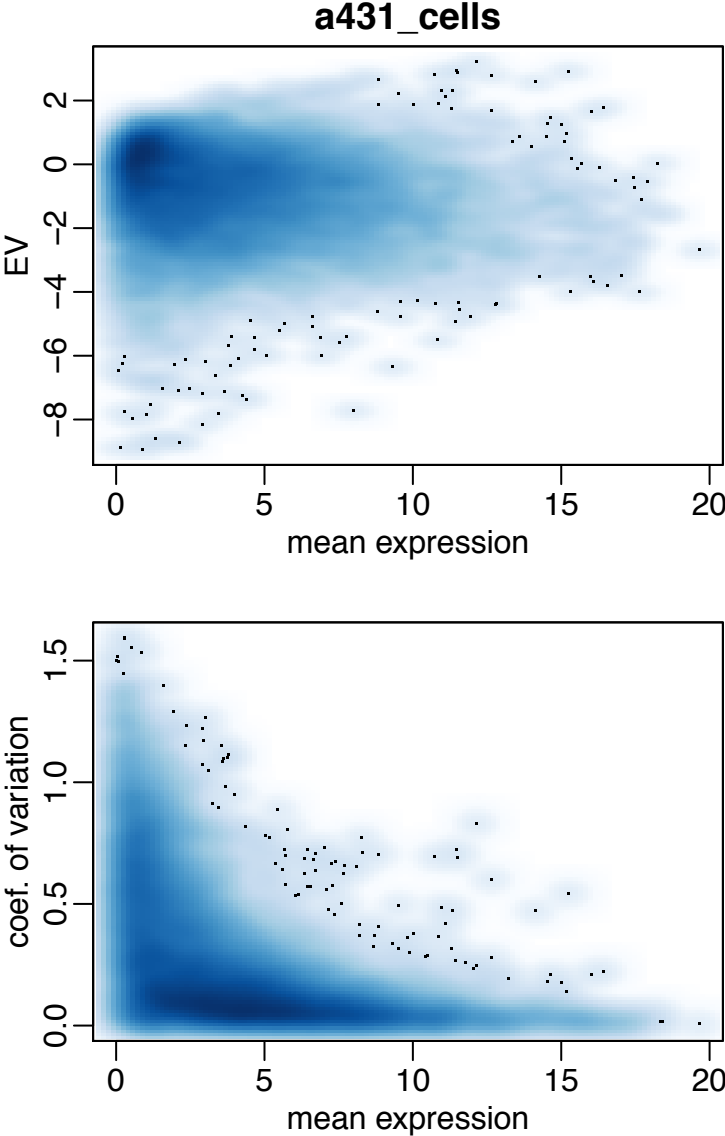

# adipose\_tissue

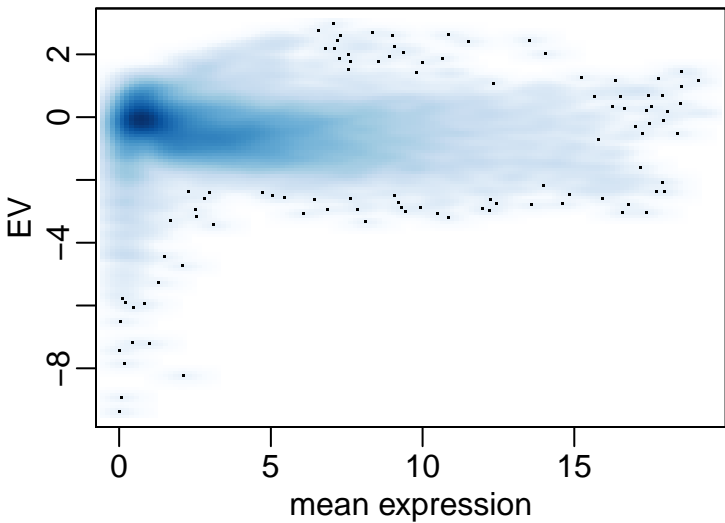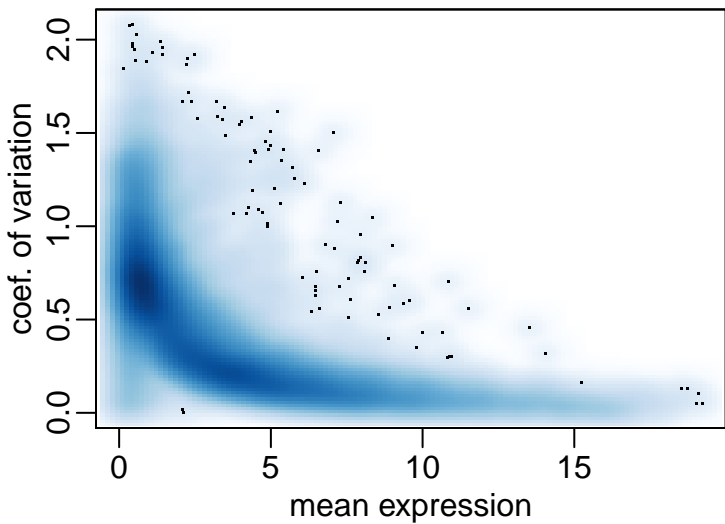

# adrenal\_cortex

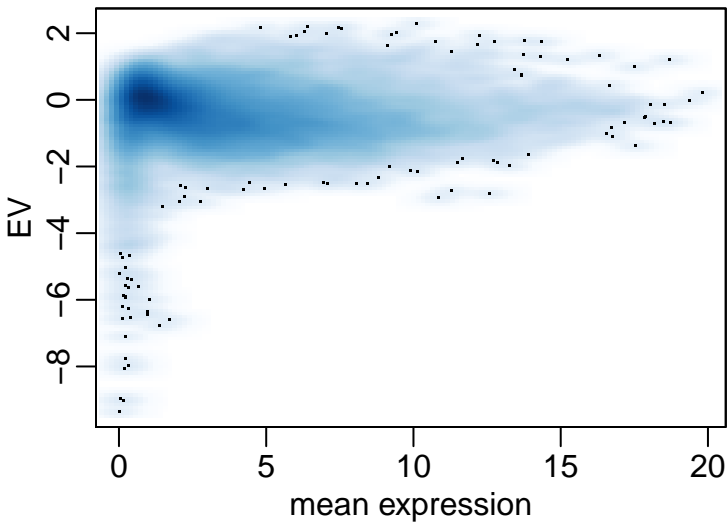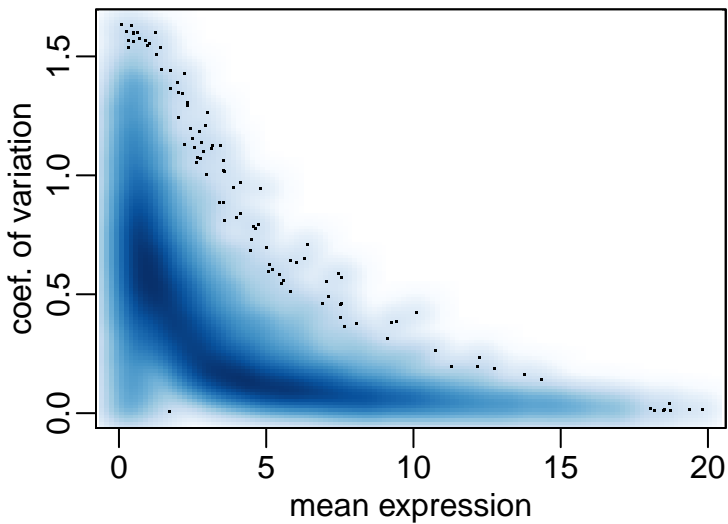

# airway\_epithelial\_cells

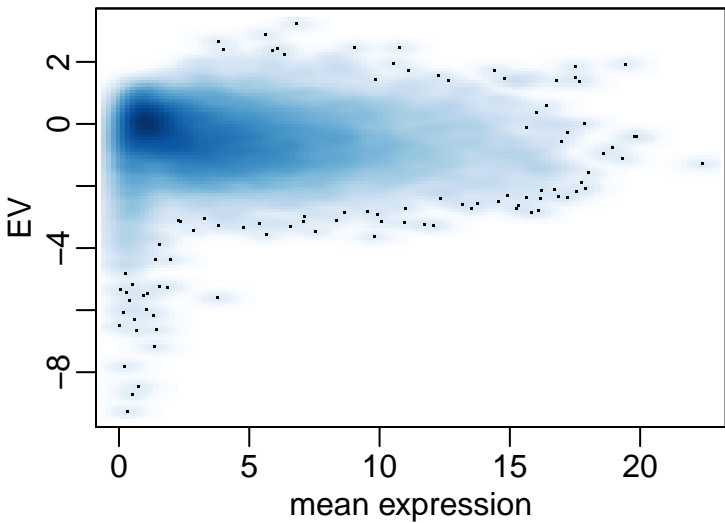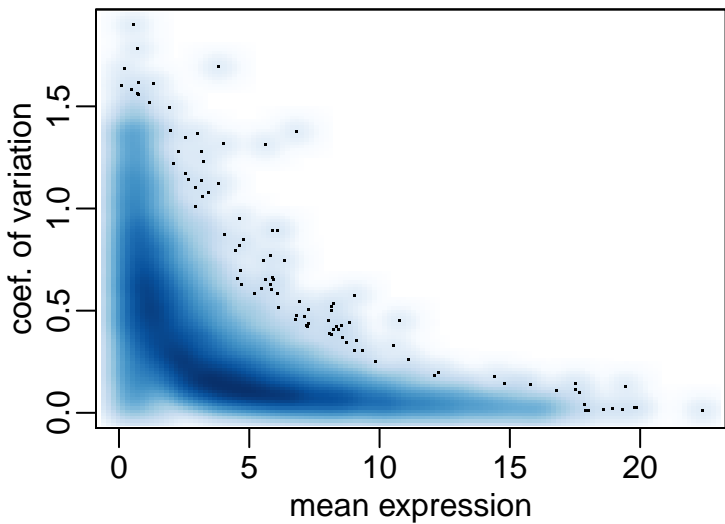

# astrocytes

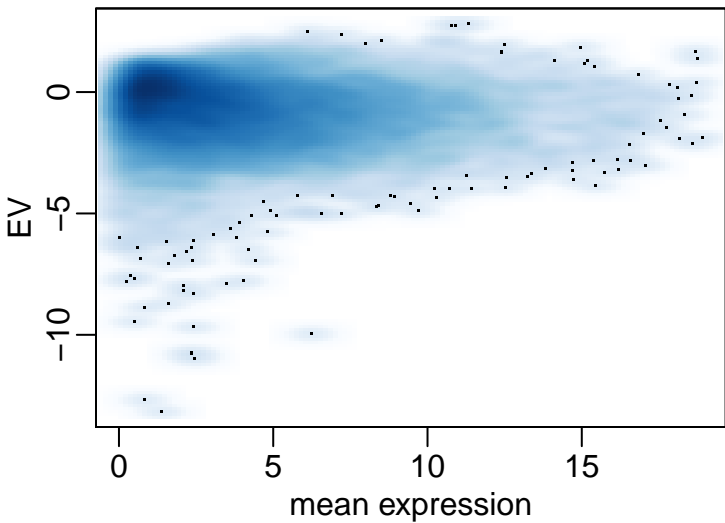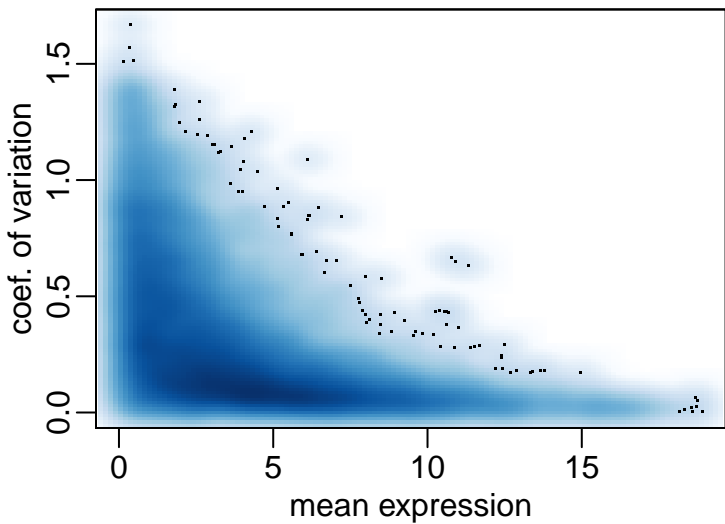

# breast

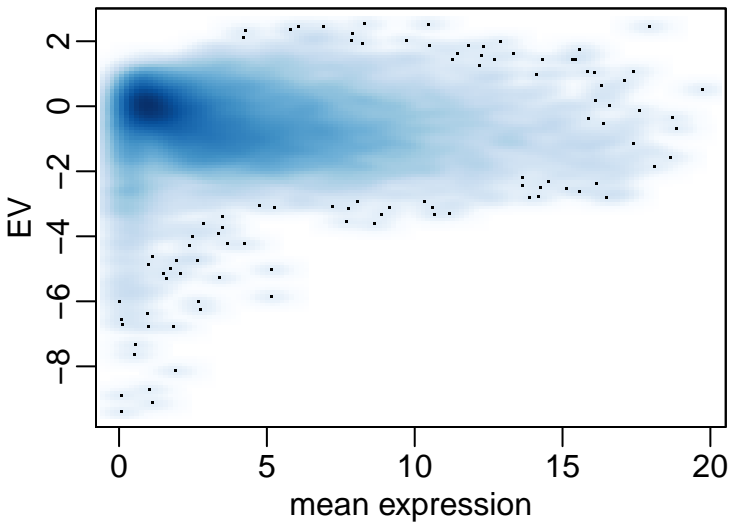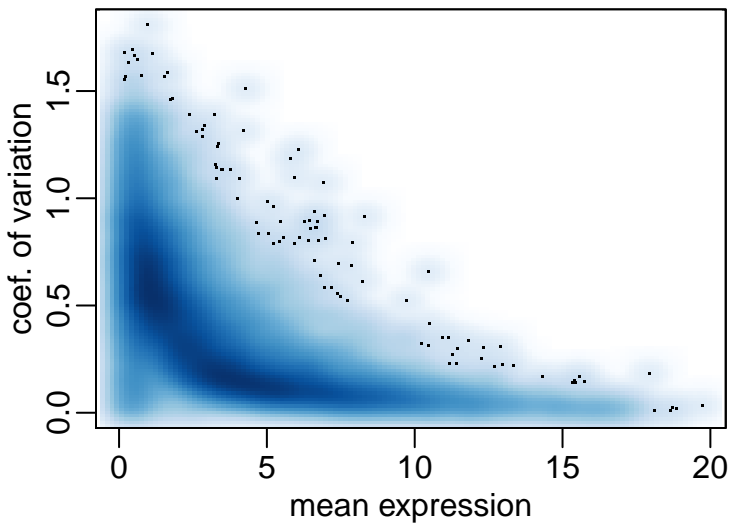

# breast\_epithelial\_cells

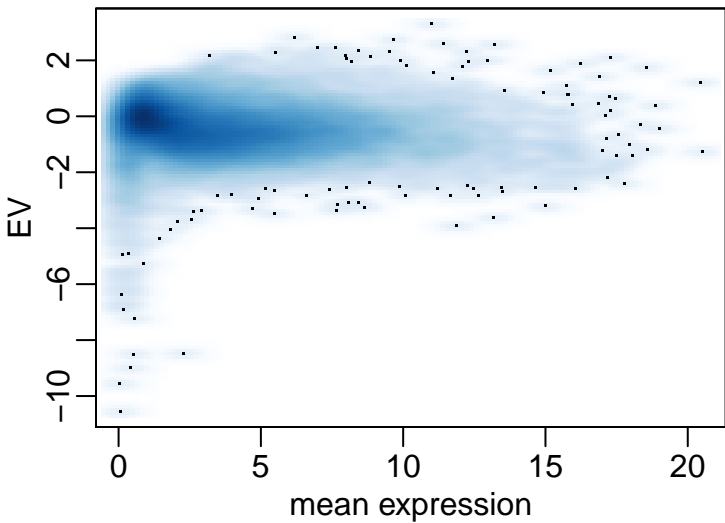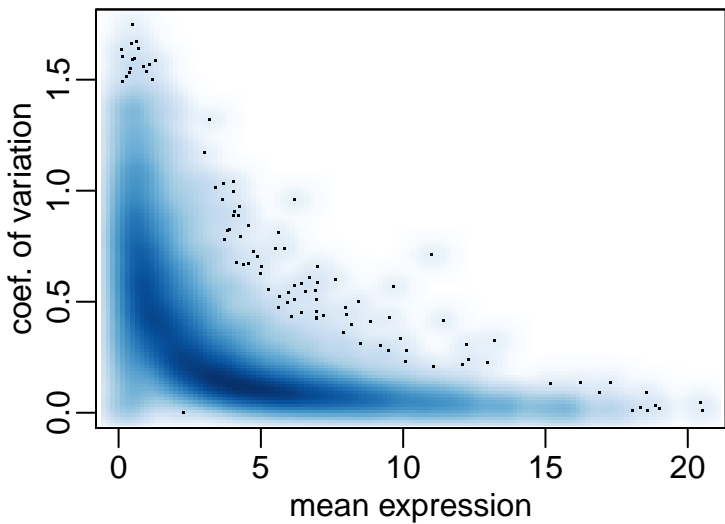



# breast\_stroma

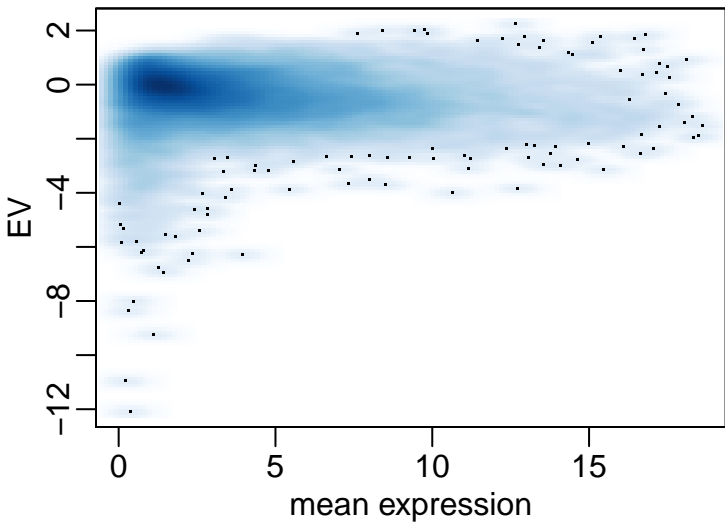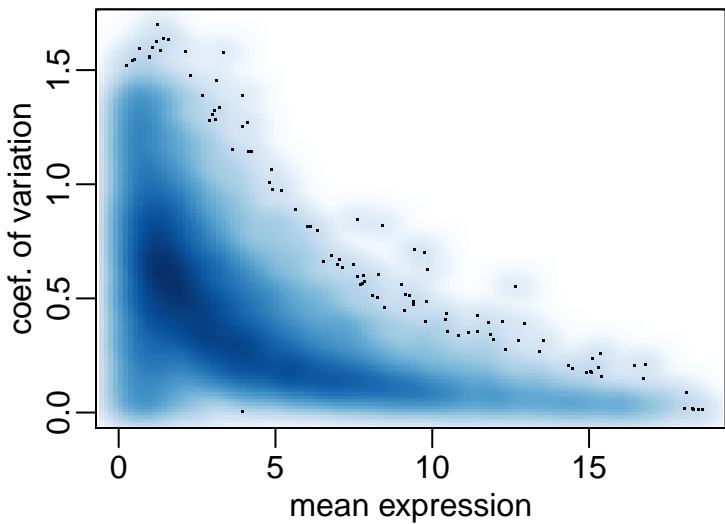

# cd31+\_cells

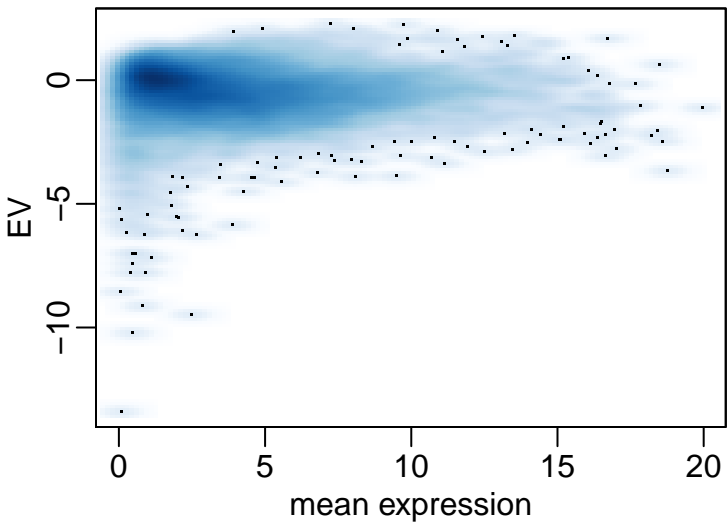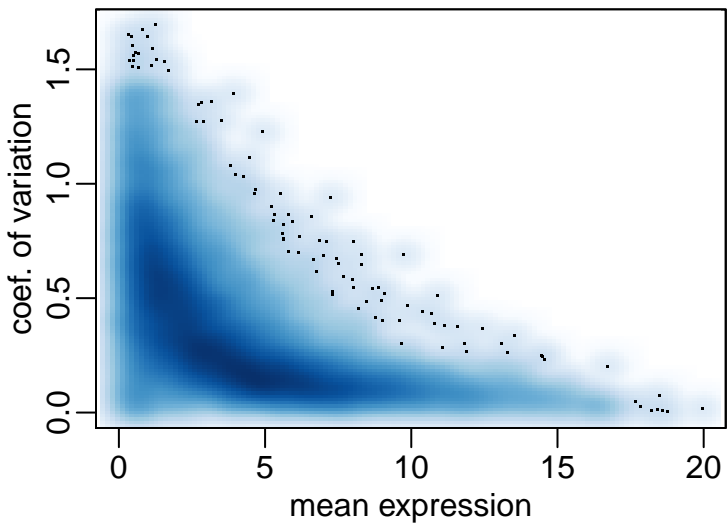

# cd49a+\_cells

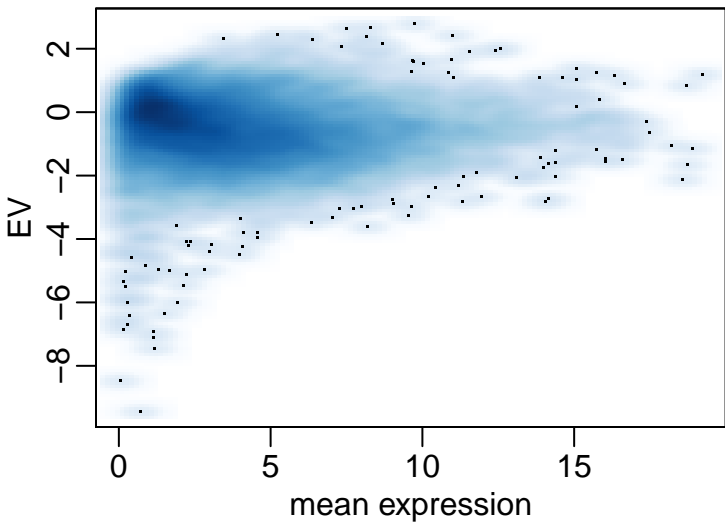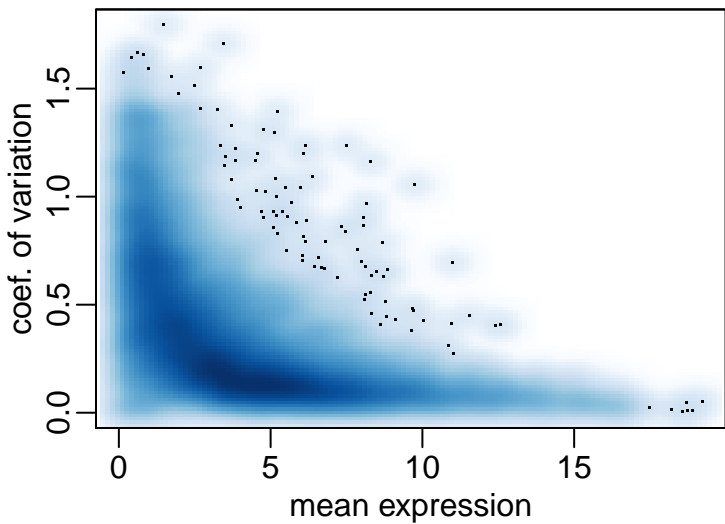

# cd4+\_t\_cells

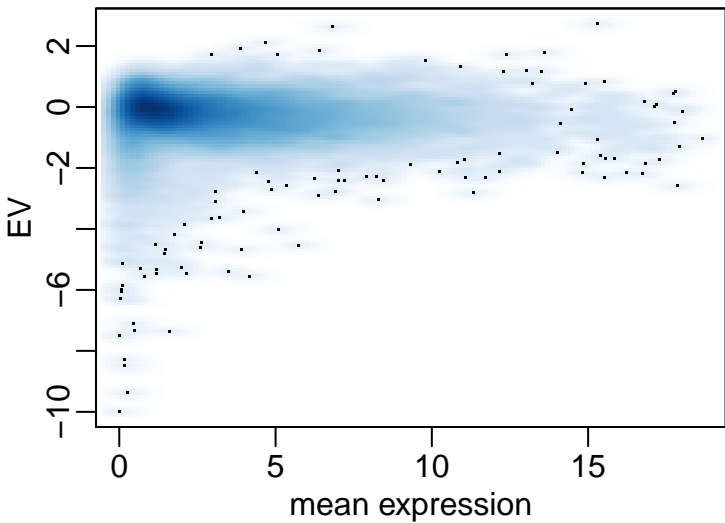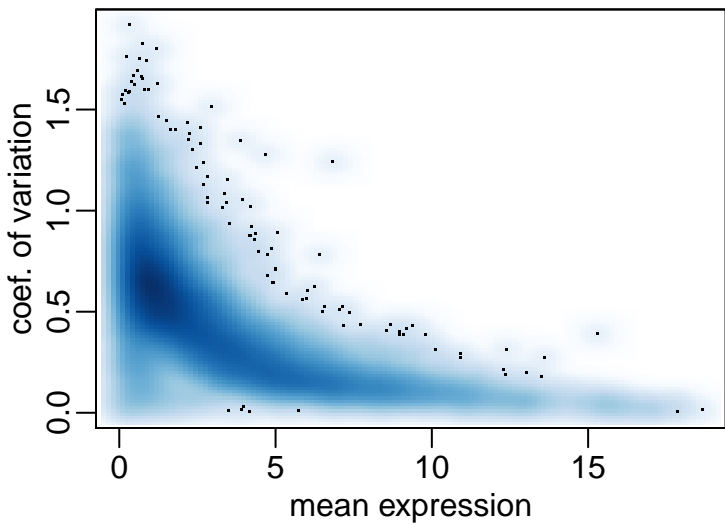

# cerebellum

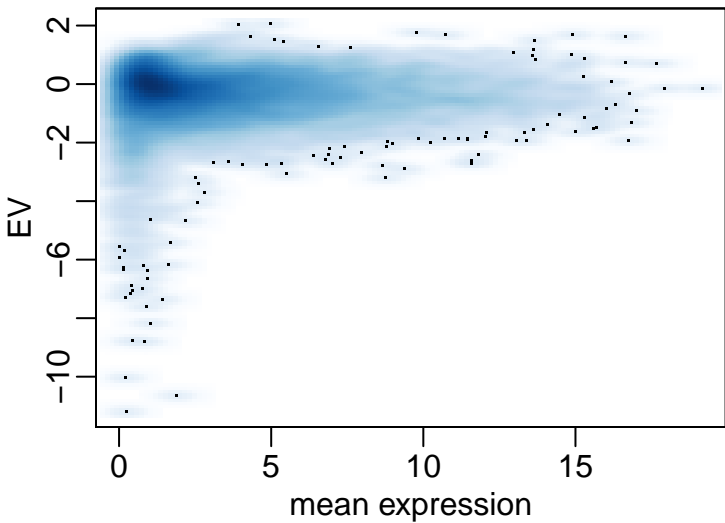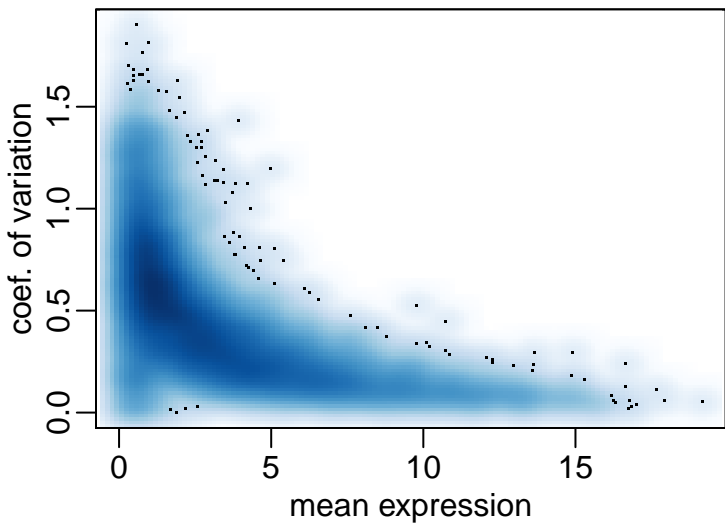

# cervix

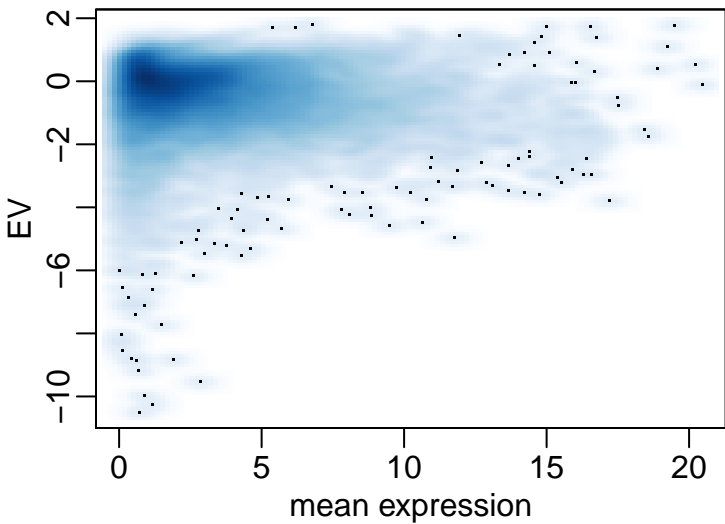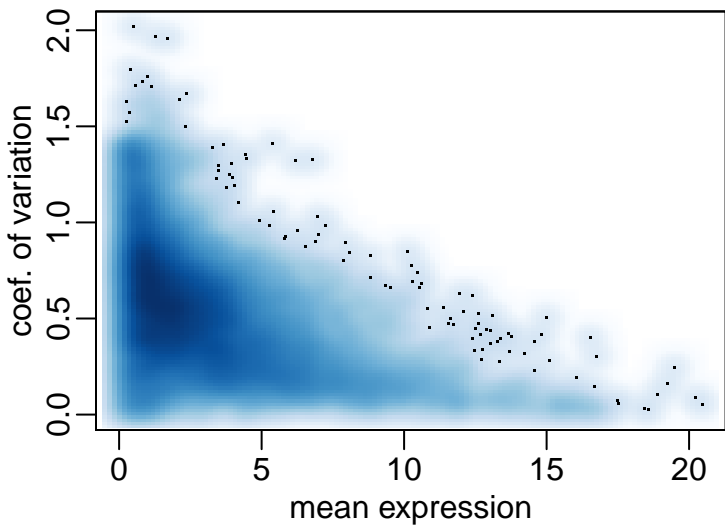

# chorion\_villus\_cells

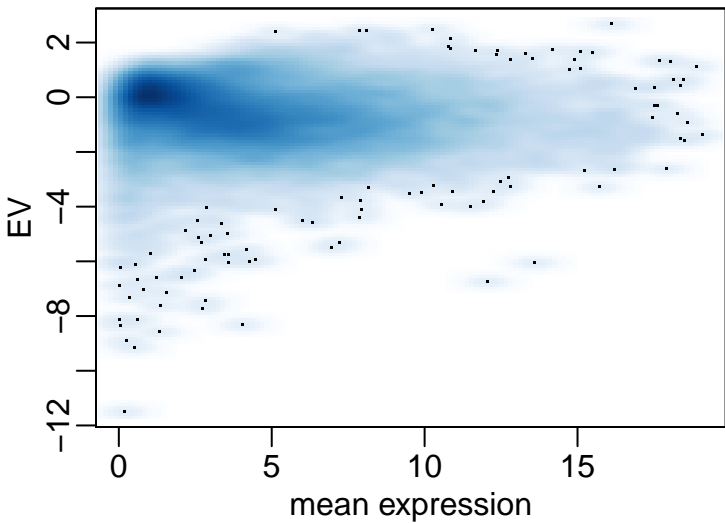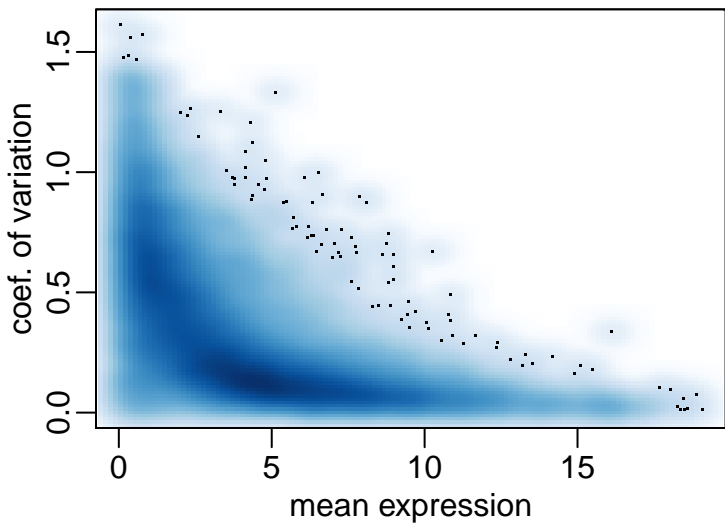

# colon

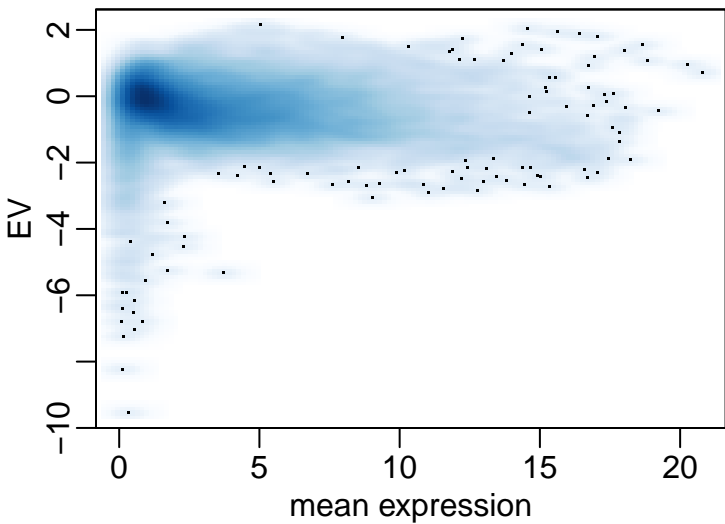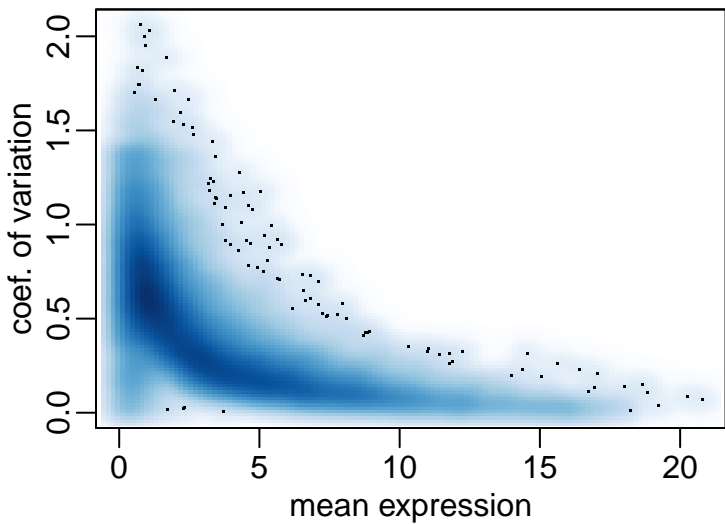



# endometrium

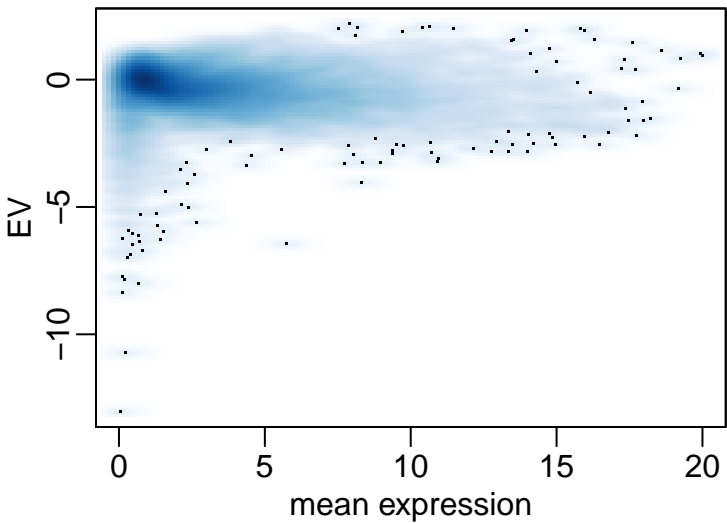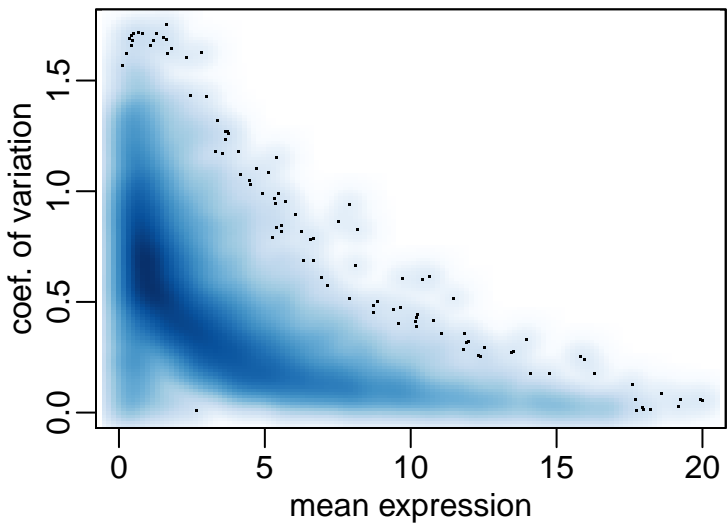

## fetal\_cartilage

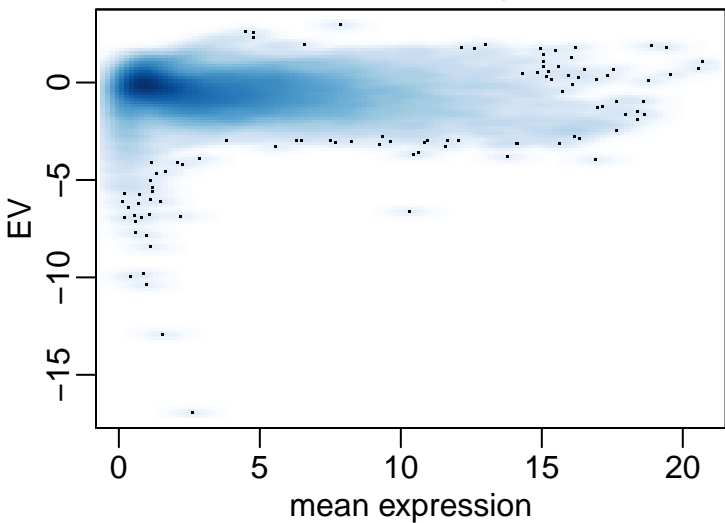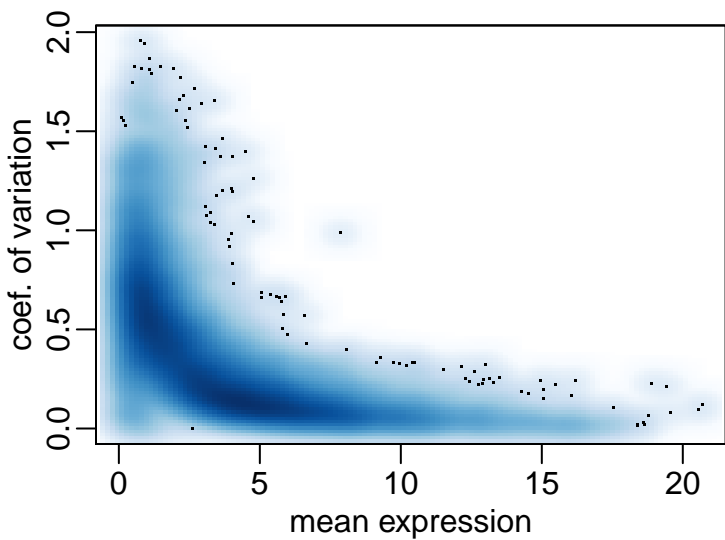

# gingival\_epithelium

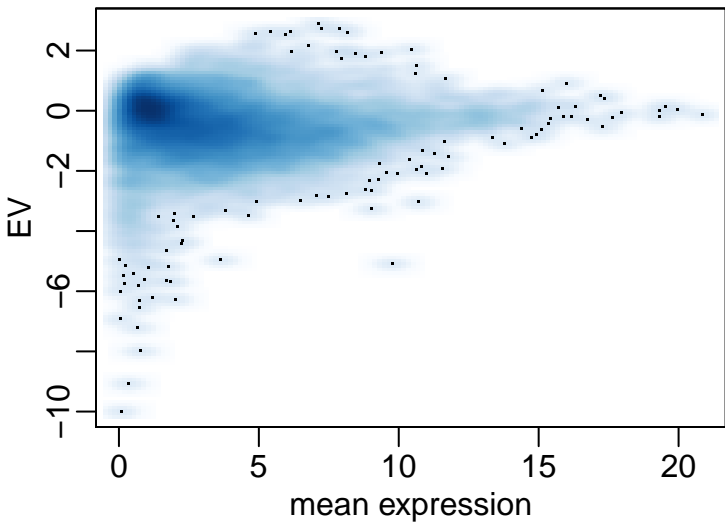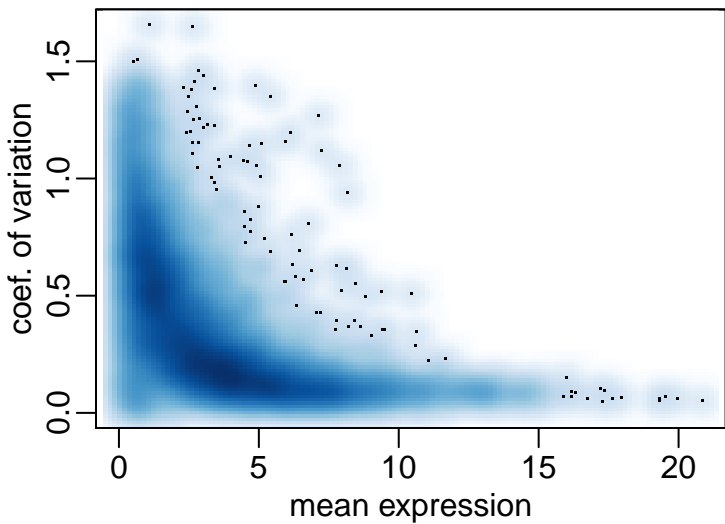

# hippocampus

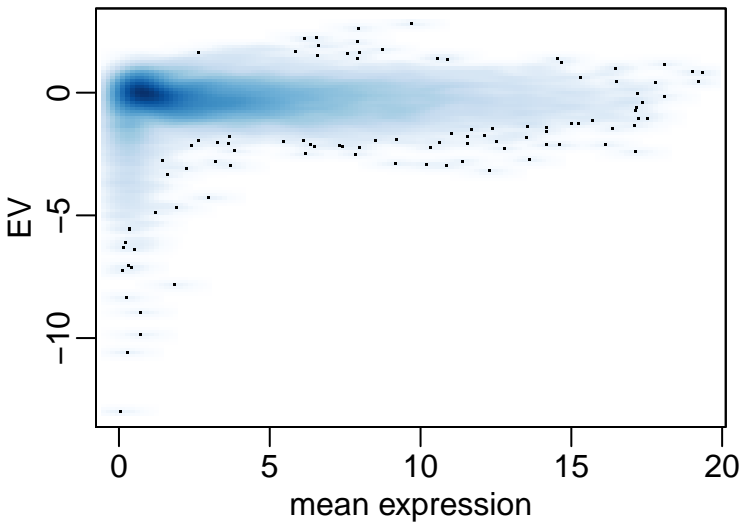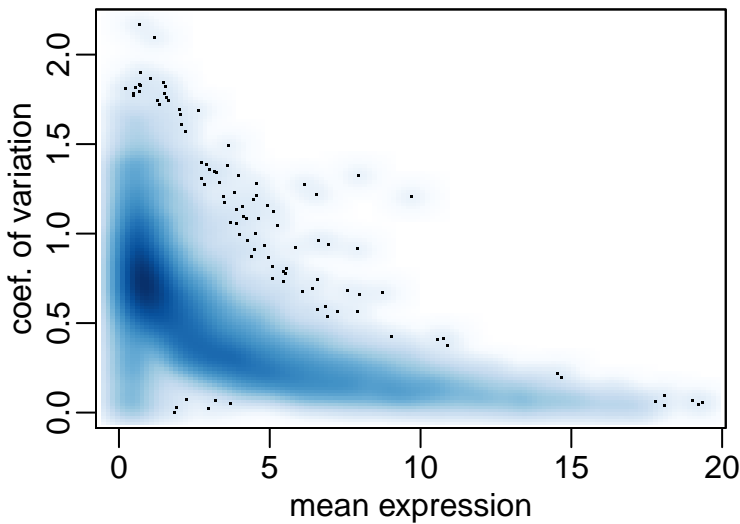

# kidney

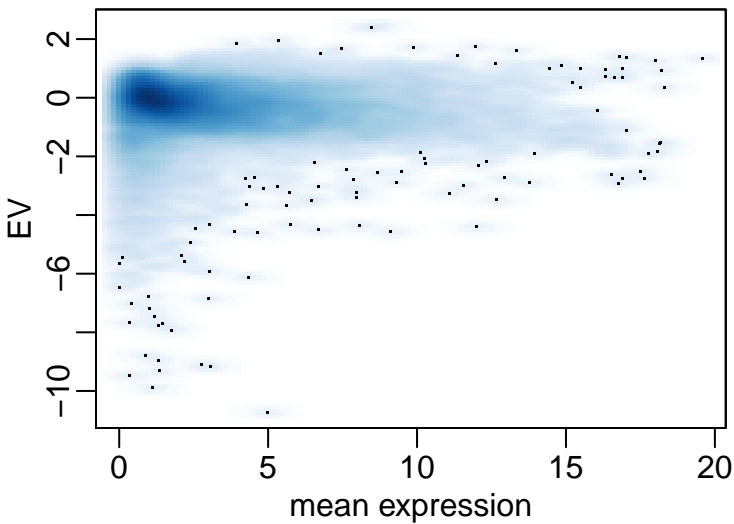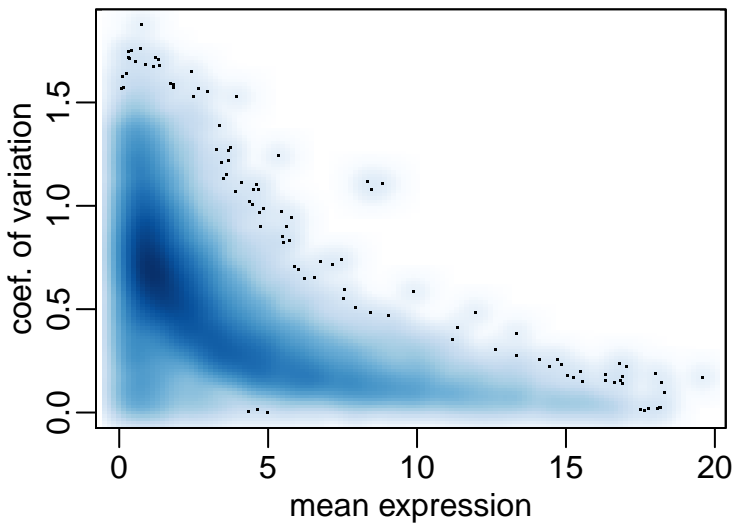

# myometrium

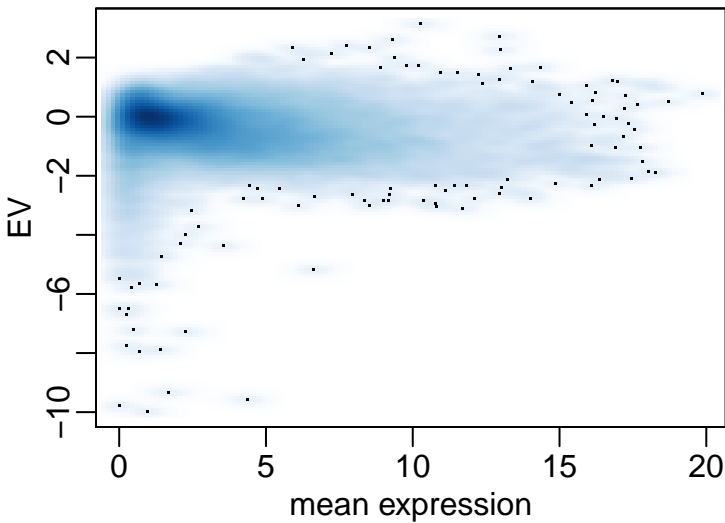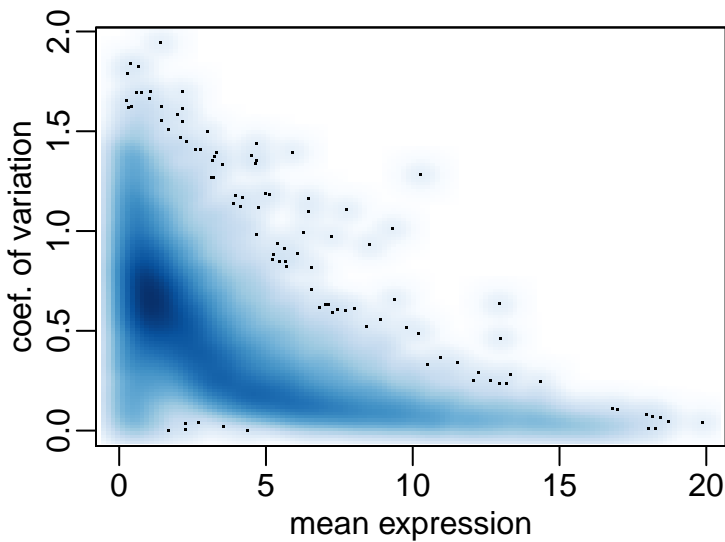

# omental\_adipose\_tissue

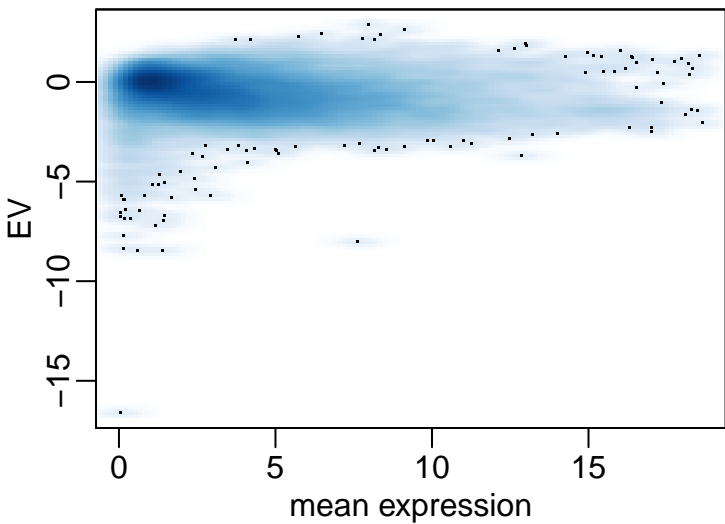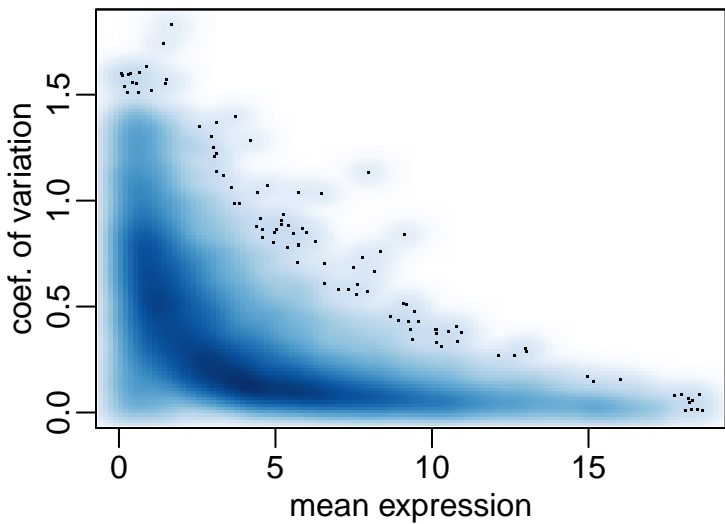

# ovary

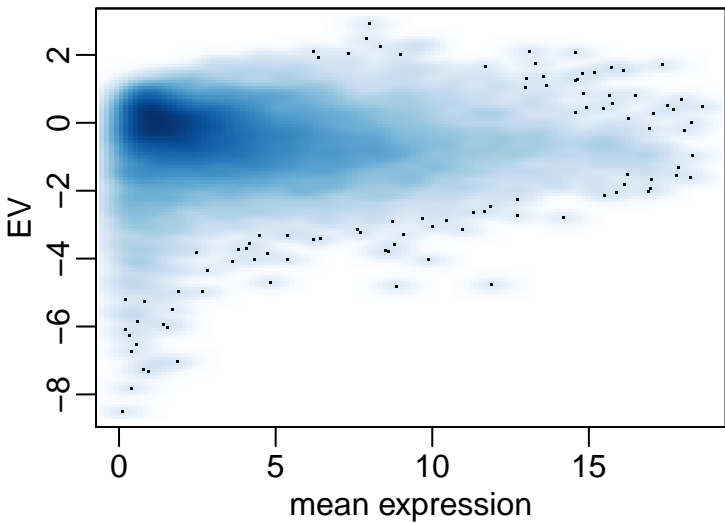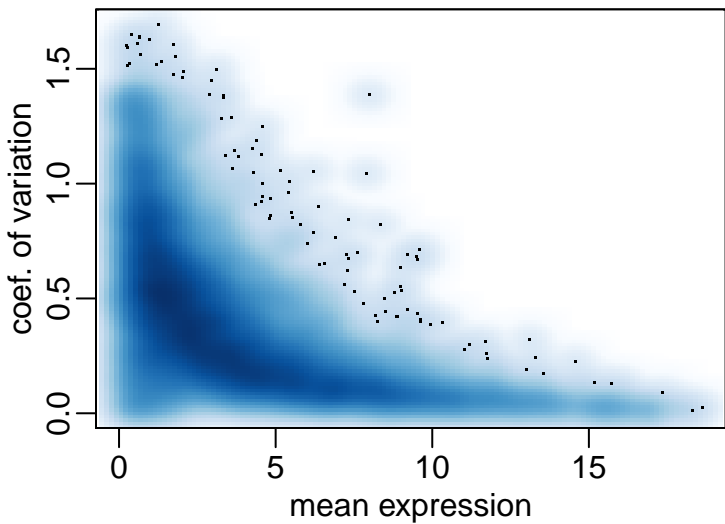



# pbmc

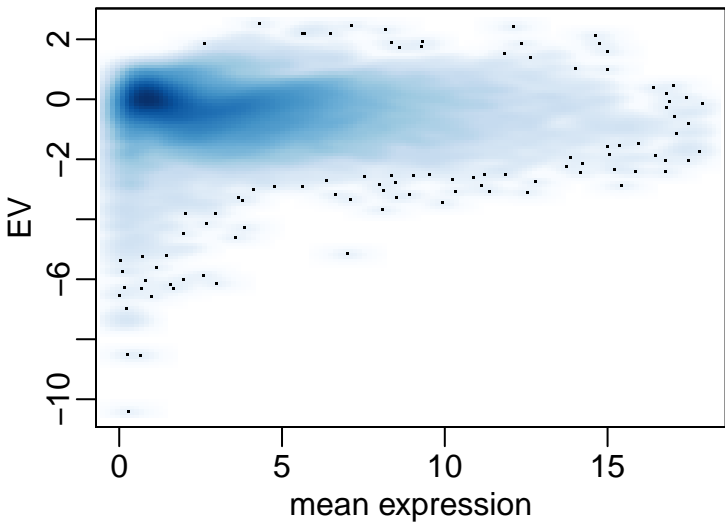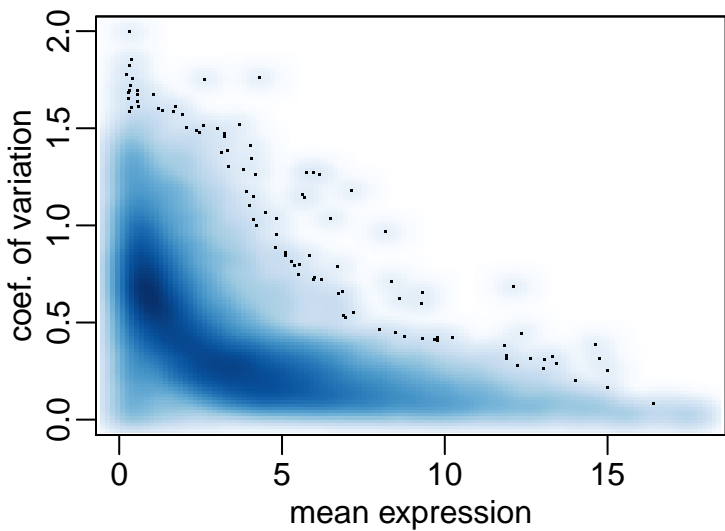

# penis

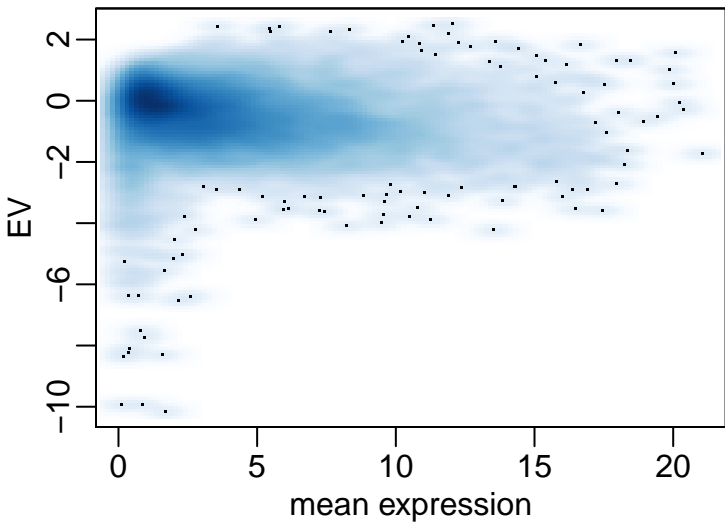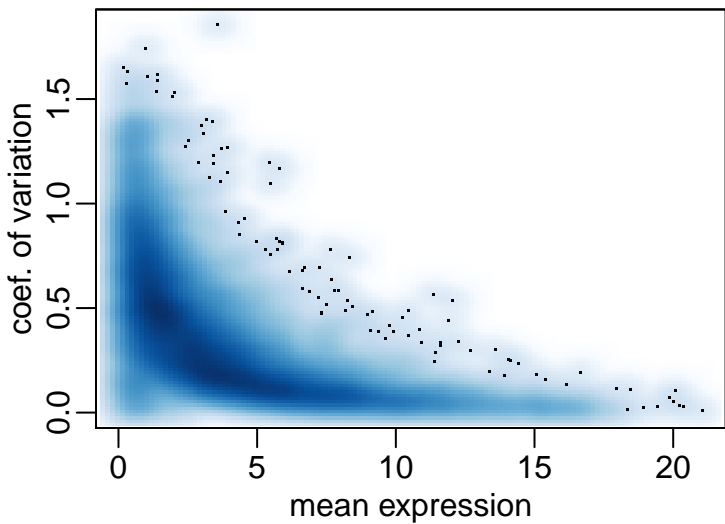

# pituitary

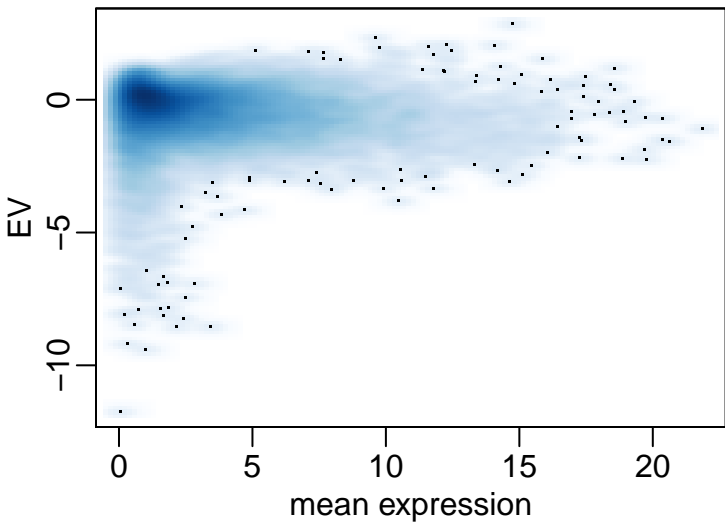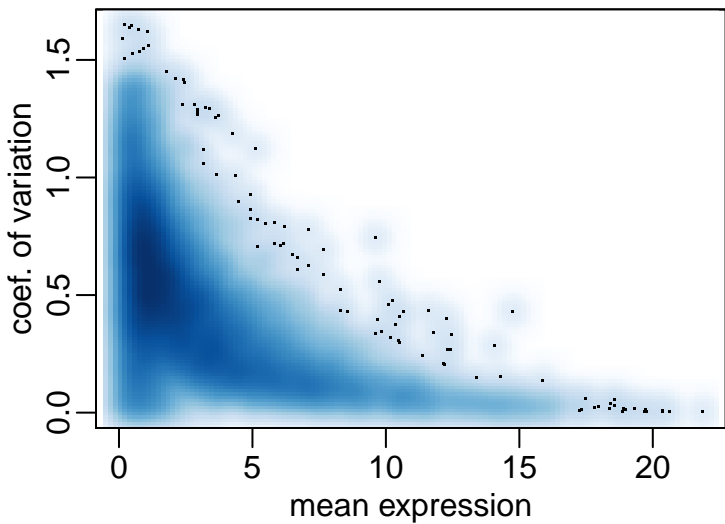

# placenta

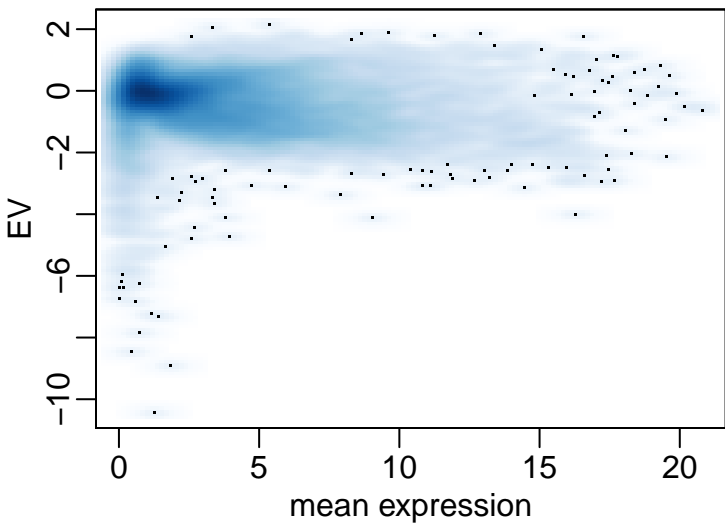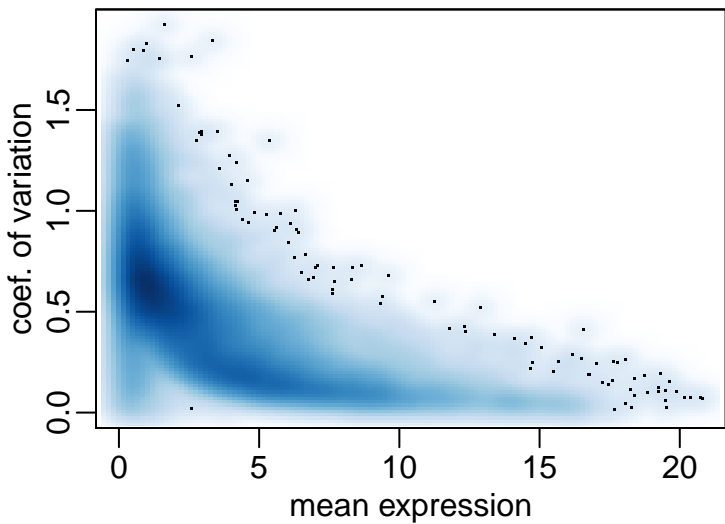

# prostate\_gland

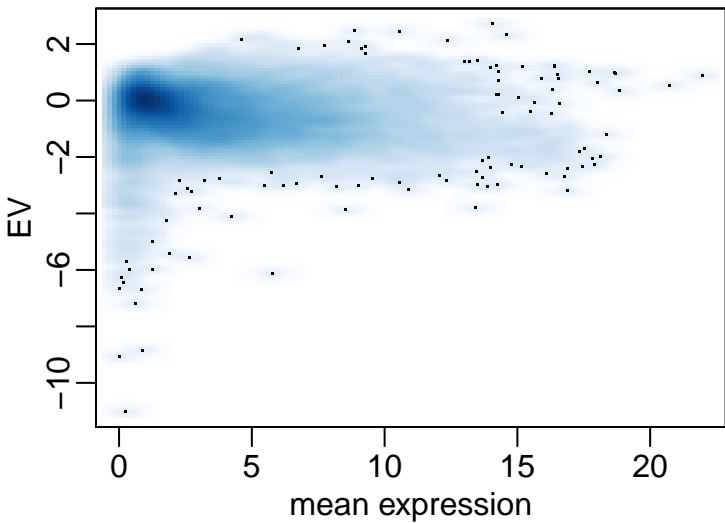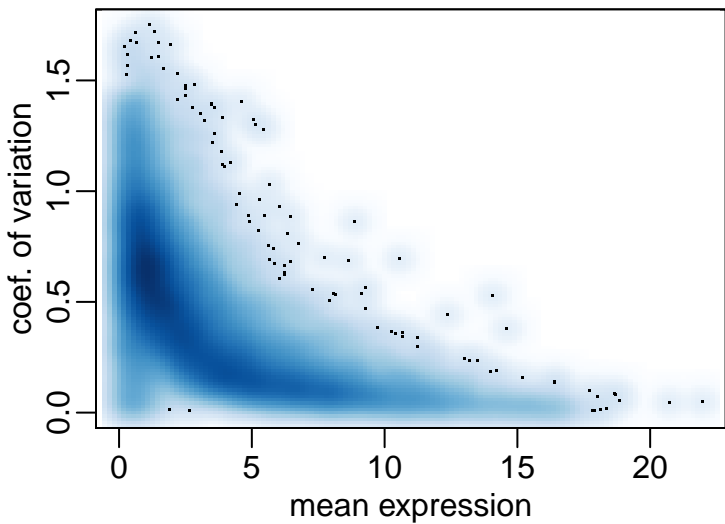

# rectum

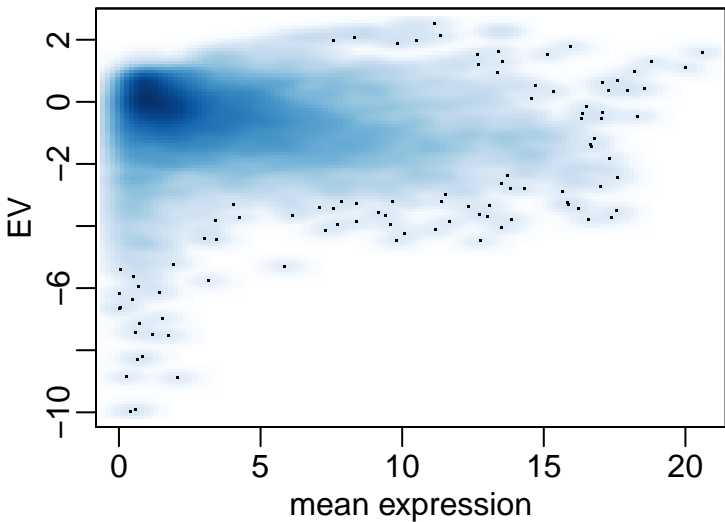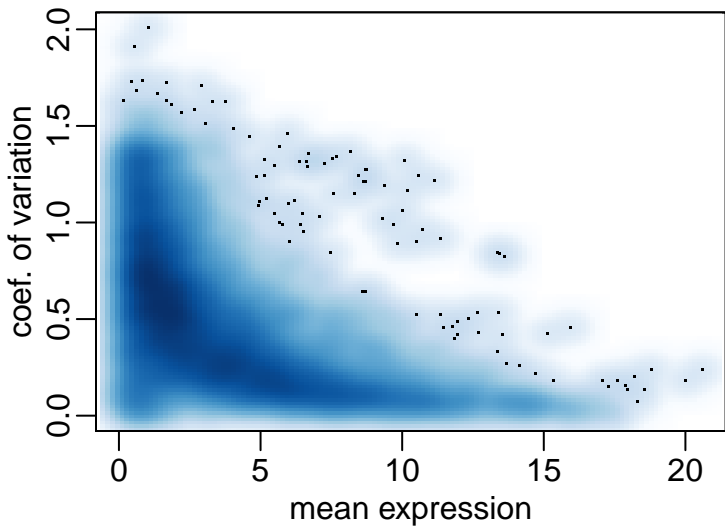

# rectum\_mucosa

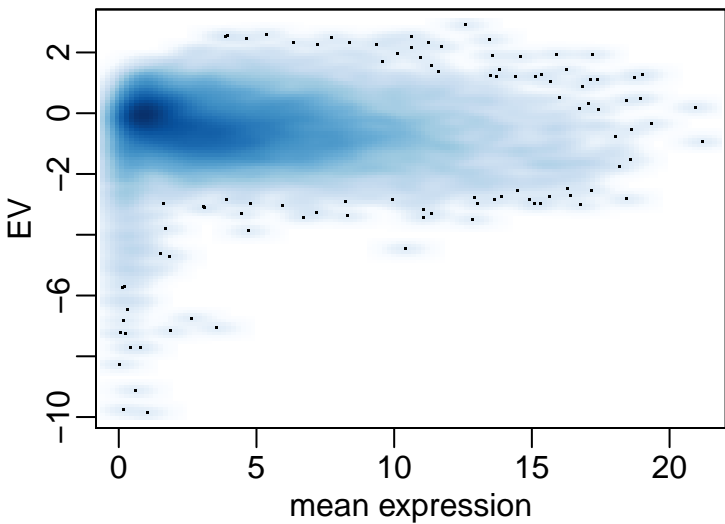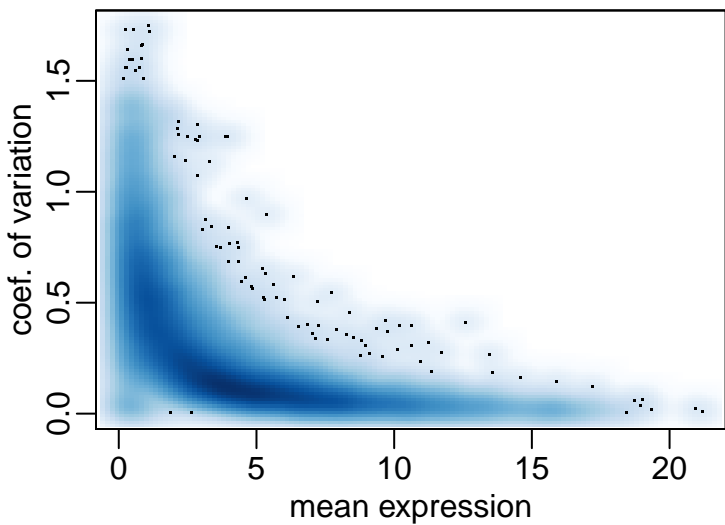

# salivary\_gland

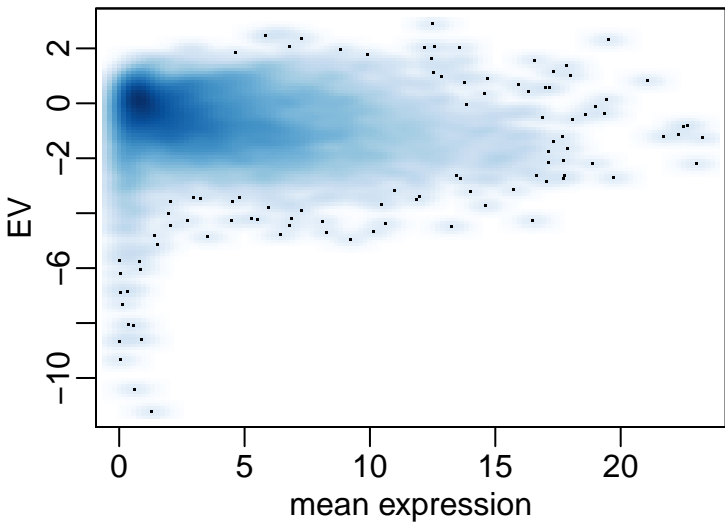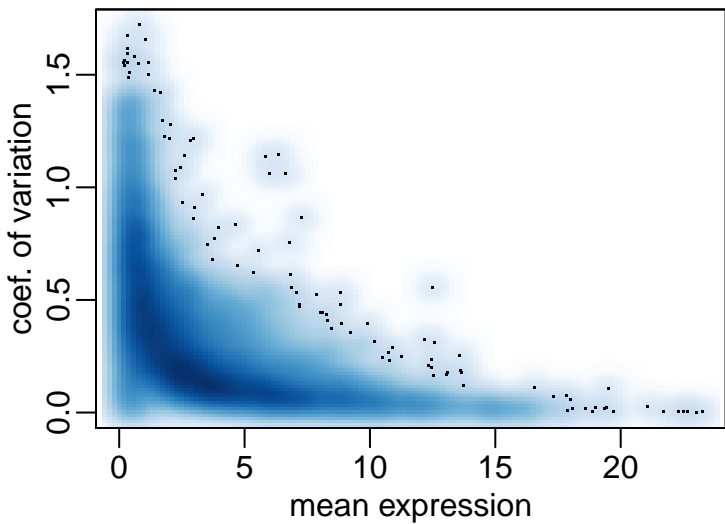



# sigmoid\_colon

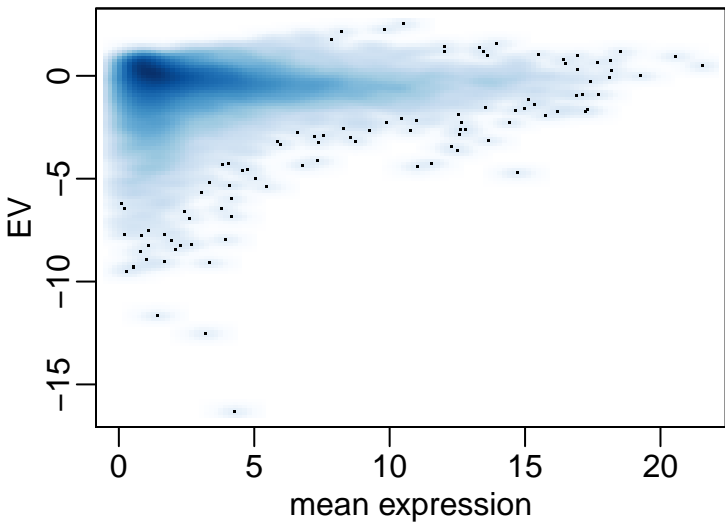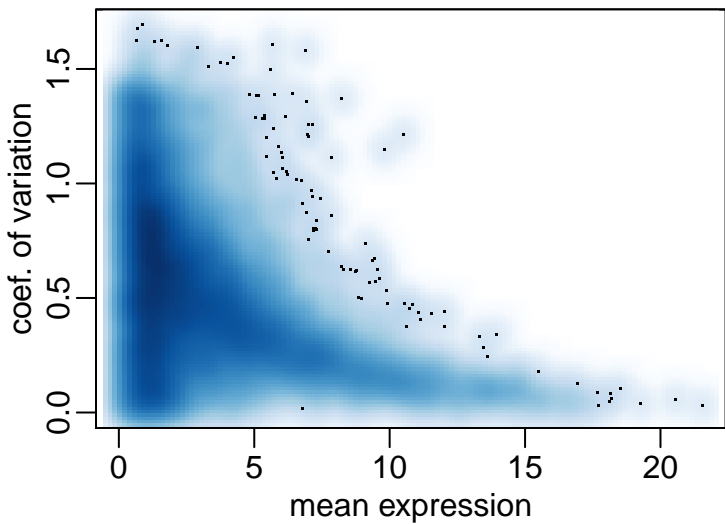

# sinus\_mucosa

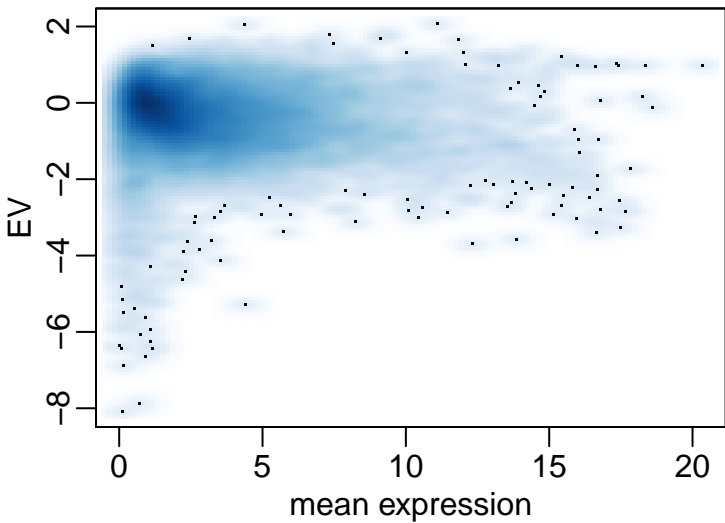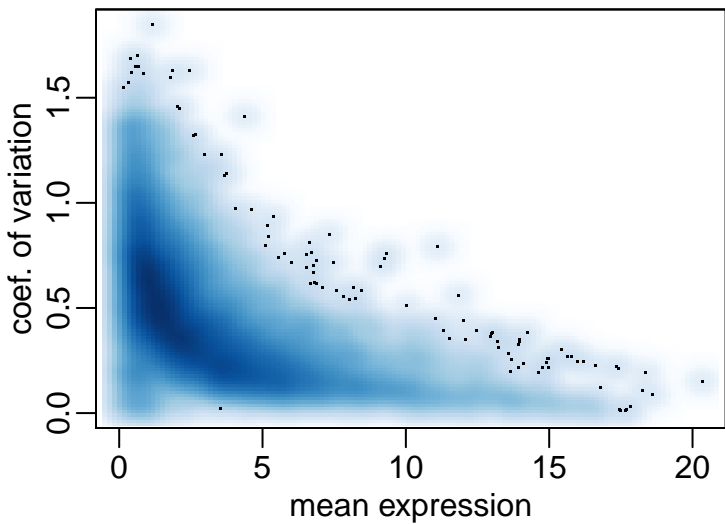

# skeletal\_muscle

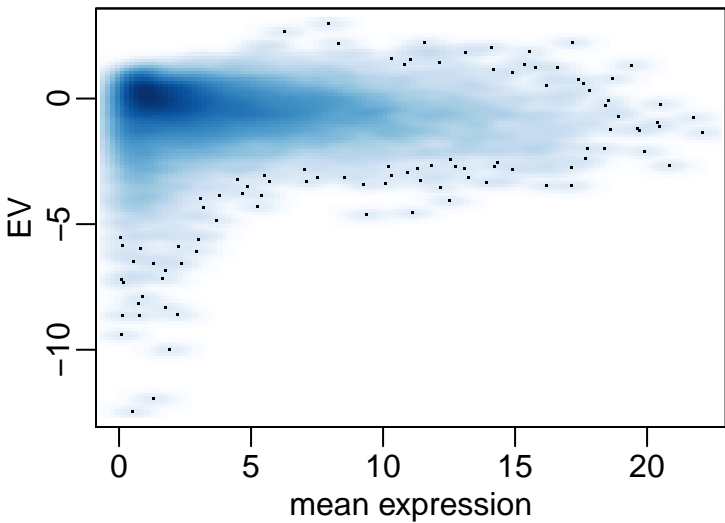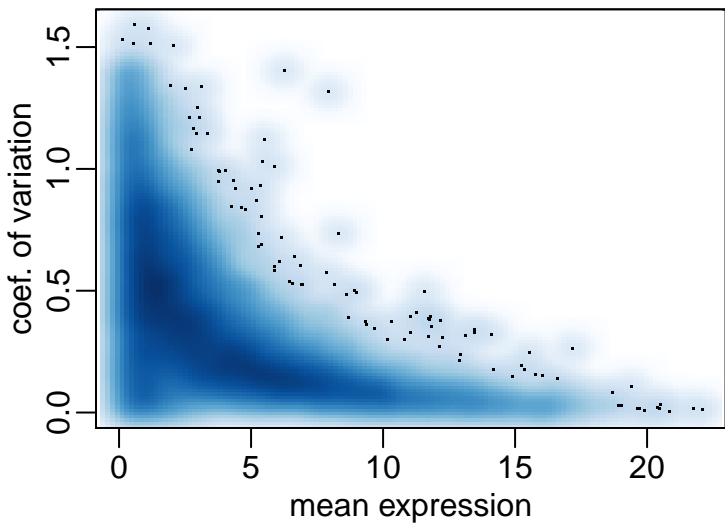

# skin

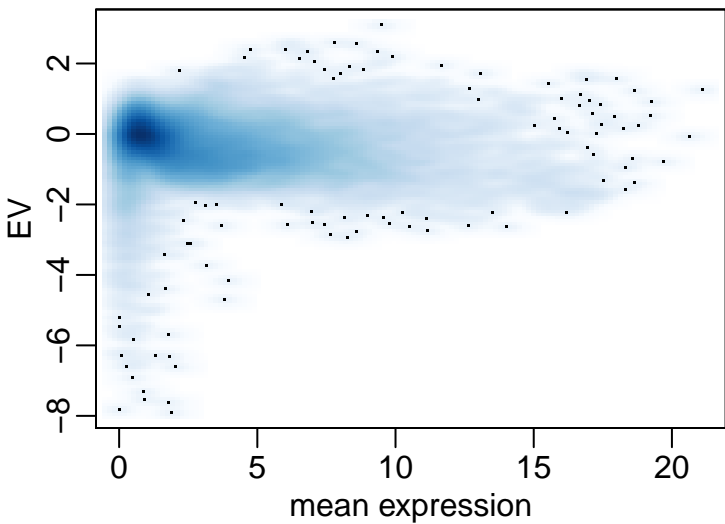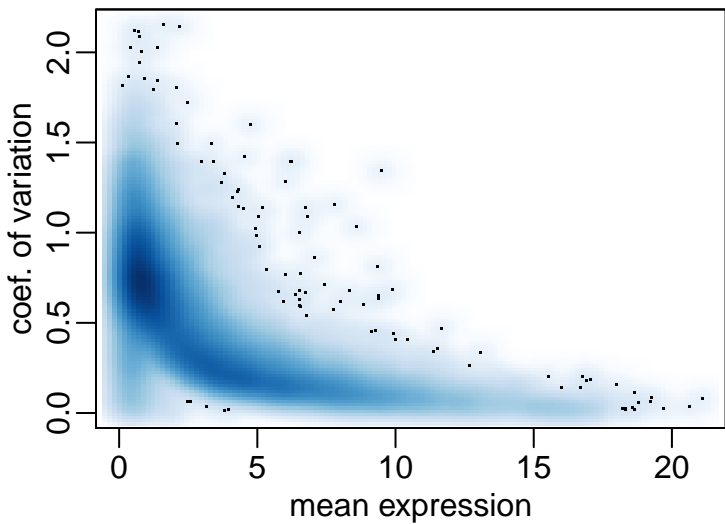

# stomach

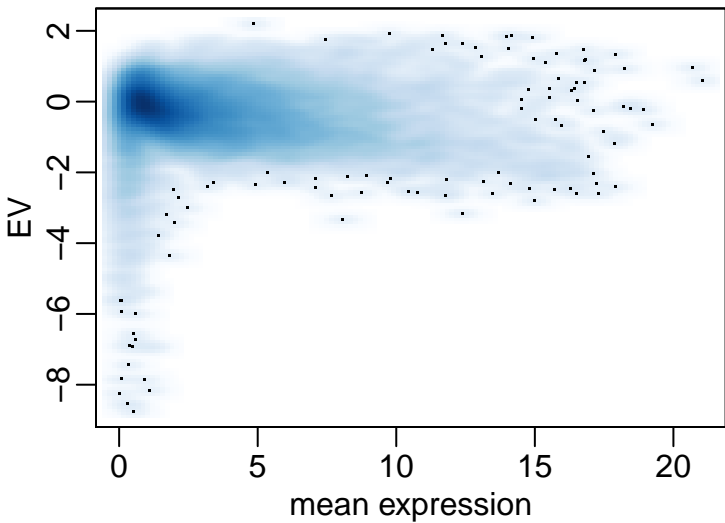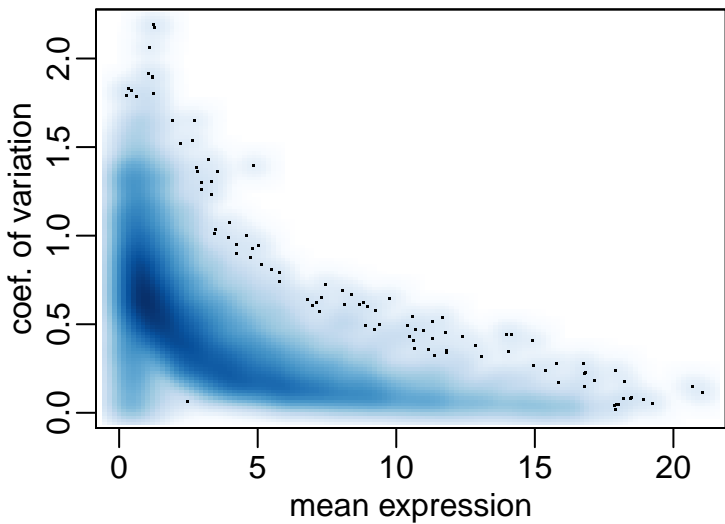

# thyroid

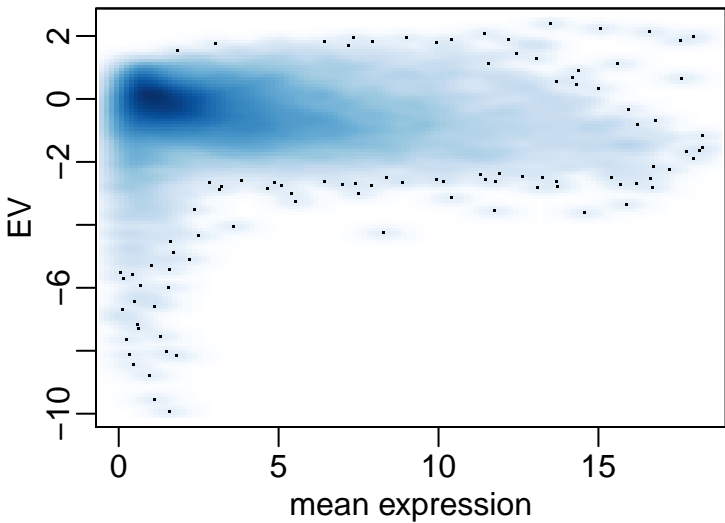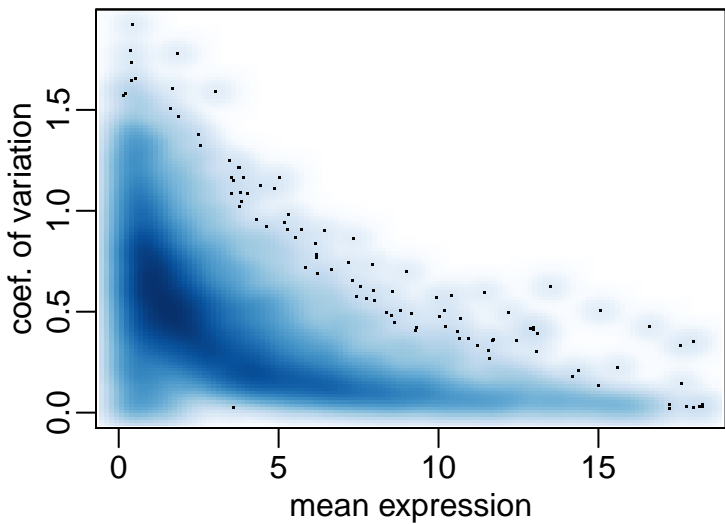

# trigeminal\_ganglia

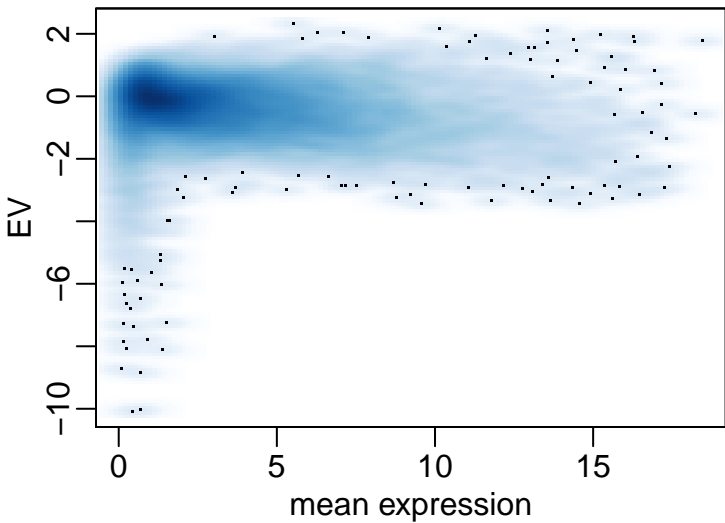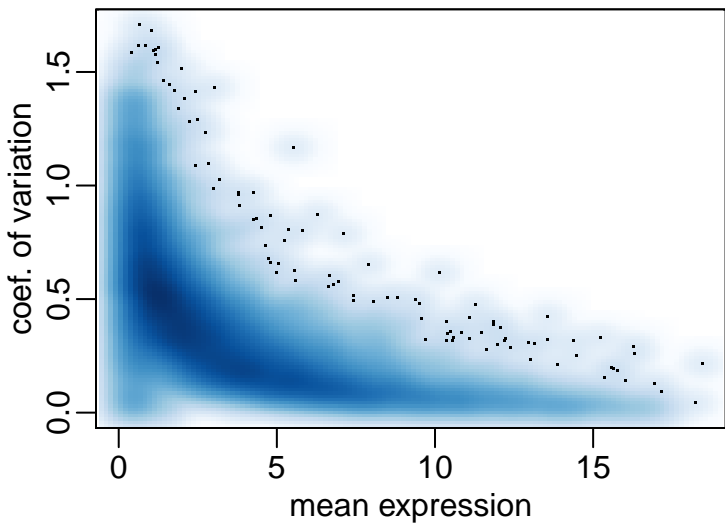

## u251\_cells

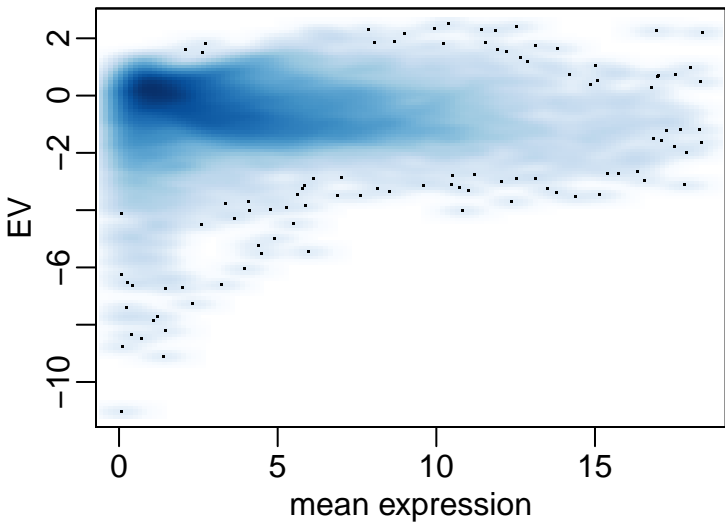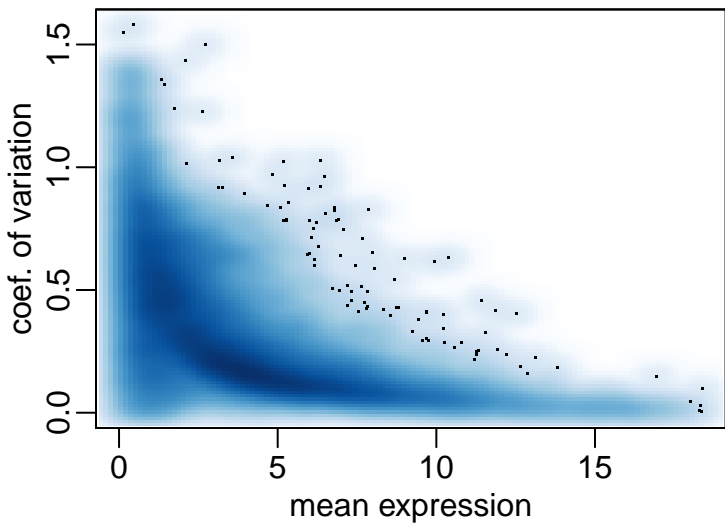



# urethra

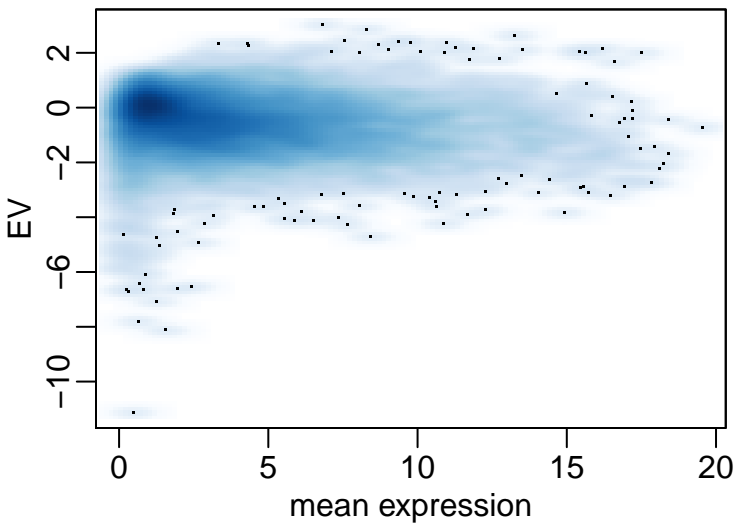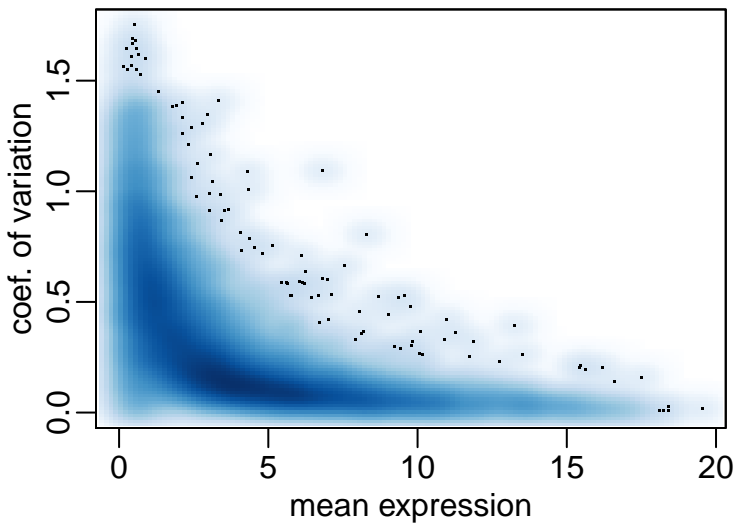

# vulva

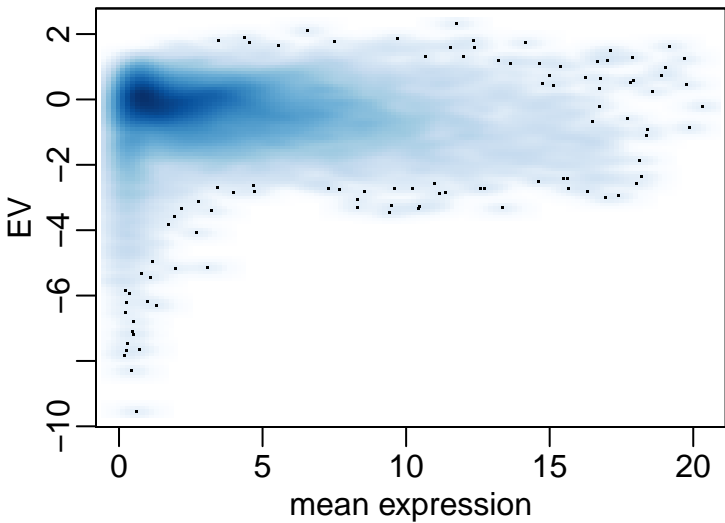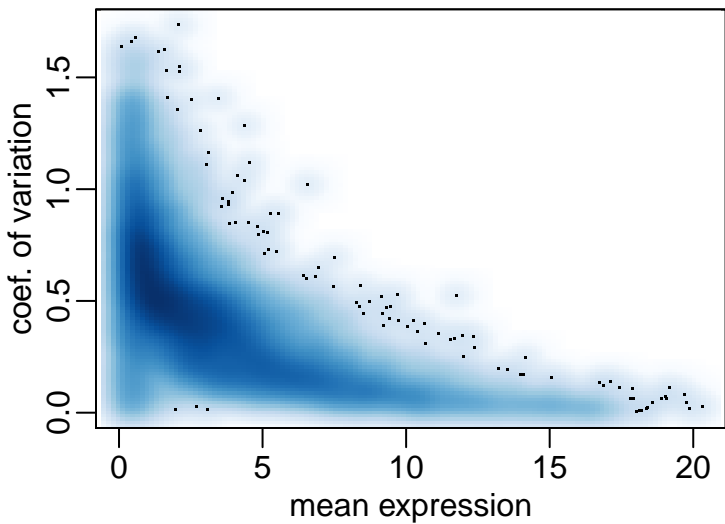

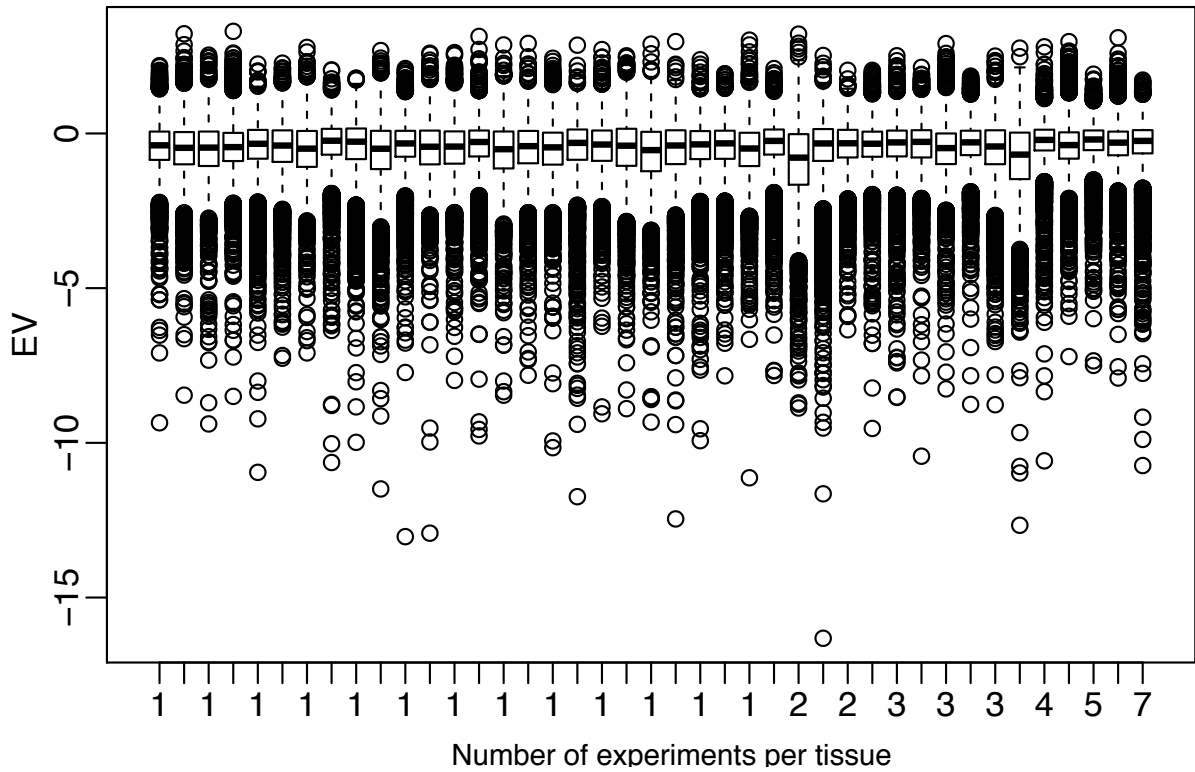

**Figure 2. EV is independent of the number of experiments per tissue in dataset.** We show the distribution of EV per tissue and indicate the number of GEO experiments used to compile the set of microarrays for each tissue. The EV distribution is very similar across tissues regardless of the number of GEO experiments included in the dataset.
